# Supplementary material for: Visible photocatalysis of novel oxime phosphonates: synthesis of β-aminophosphonates
Source: Royal Society of Chemistry journal article supplement (doi:10.1039/c9cc06075h), 2019-01-01
Supplement: c9cc06075h1.pdf [file c9cc06075h1.pdf]

## Supporting information

### New Oxime Phosphonates Participated Visible

### Photocatalysis: Synthesis of $\beta$ -Aminophosphonates

Yong-Hong Li,<sup>†</sup><sup>♀</sup> Chun-Hai Wang,<sup>†</sup><sup>♀</sup> Su-Qian Gao,<sup>†</sup> Feng-Ming Qi,<sup>†</sup> Shang-Dong Yang\*<sup>†</sup><sup>‡</sup>

<sup>†</sup>State Key Laboratory of Applied Organic Chemistry, Lanzhou University, Lanzhou 730000, P. R. China.

<sup>‡</sup> Key Lab of Functional Molecular Engineering of Guangdong Province, South China University of Technology, Guangzhou 510640, P. R. China.

<sup>♀</sup>These authors contributed equally to this work.

### Table of contents

|                                                                 |    |
|-----------------------------------------------------------------|----|
| 1. General information.....                                     | 2  |
| 2. Synthesis of substrates.....                                 | 2  |
| 2.1. Synthesis of alkenes.....                                  | 2  |
| 2.2. Synthesis of phosphorus reagents.....                      | 2  |
| 3. General procedure.....                                       | 3  |
| 3.1. General procedure for Phosphorus radical onto alkenes..... | 3  |
| 4. Mechanism studies.....                                       | 3  |
| 4.1. Radical trapping experiment.....                           | 3  |
| 4.2. Iminyl radical trapping experiment.....                    | 7  |
| 4.3. Clock experiment.....                                      | 9  |
| 4.4. Deuterium-labeled experiment.....                          | 11 |
| 4.5. Luminescence quenching experiments.....                    | 13 |
| 4.6 Cyclic voltammetry for compound <b>2a</b> .....             | 14 |
| 4.7 Irradiation setup picture.....                              | 14 |
| 5. Removing the protecting groups.....                          | 16 |
| 6. Application.....                                             | 18 |
| 5.1. Intramolecular cyclization reaction.....                   | 18 |
| 5.2 Gram-Scale reaction.....                                    | 19 |
| 7. Reference.....                                               | 20 |
| 8. Characterization data.....                                   | 20 |
| 9. Spectra.....                                                 | 35 |

## 1. General information

$^1\text{H}$  NMR (400 MHz) and  $^{13}\text{C}$  NMR (100 MHz) spectra were recorded on a Bruker advance III 400 spectrometer in  $\text{CDCl}_3$  with TMS as internal standard.  $^{31}\text{P}$  NMR (162 MHz) spectra and  $^{19}\text{F}$  NMR (376 MHz) were recorded on the same instrument. Mass spectra were measured using Thermo Scientific DSQ II. The starting materials were purchased from Aldrich, Acros Organics, J&K Chemicals or TCI and used without further purification. Solvents were dried and purified according to the procedure from "Purification of Laboratory Chemicals book". Column chromatography was carried out on silica gel (particle size 200-400 mesh ASTM).

## 2. Synthesis of substrates

### 2.1 Synthesis of alkenes

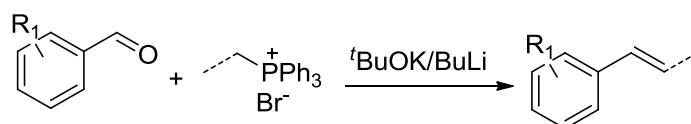

#### The Preparation of Alkenes (Method A)

**Method A:** To a suspension of  $\text{Me/EtPPh}_3\text{Br}$  (26.70/27.75 g, 75.0 mmol, 1.5 equiv.) in THF (120.00 mL),  $t\text{BuOK}$  (8.98 g, 80.0 mmol, 1.6 equiv.) was added portionwise. The reaction was allowed to stir at room temperature for 30 min. It was then cooled to  $0\text{ }^\circ\text{C}$  and a solution of corresponding aldehyde (50.0 mmol, 1.0 equiv.) in THF (50.00 mL) was added dropwise. The mixture was stirred at  $0\text{ }^\circ\text{C}$  for 30 min and then warmed to room temperature for 1.5 h. The reaction was quenched with water. The aqueous phase was extracted with  $\text{Et}_2\text{O}$  three times. The organic fractions were washed with brine, dried over  $\text{Na}_2\text{SO}_4$  and concentrated under reduced pressure. The crude product was purified by column chromatography to afford corresponding alkenes.

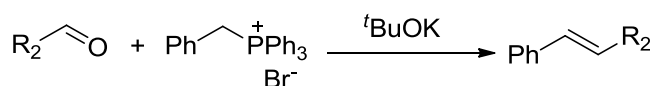

#### The Preparation of Alkenes (Method B)

**Method B:** To a suspension of  $\text{BnPPh}_3\text{Br}$  (25.92 g, 60.0 mmol, 1.5 equiv.) in THF (120.00 mL),  $t\text{BuOK}$  (7.30 g, 80.0 mmol, 1.3 equiv.) was added portionwise. The reaction was allowed to stir at room temperature for 30 min. It was then cooled to  $0\text{ }^\circ\text{C}$  and a solution of corresponding aldehyde (50.0 mmol, 1.0 equiv.) in THF (50.00 mL) was added dropwise. The mixture was stirred at  $0\text{ }^\circ\text{C}$  for 30 min and then warmed to room temperature for 1.5 h. The reaction was quenched with water. The aqueous phase was extracted with  $\text{Et}_2\text{O}$  three times. The organic fractions were washed with brine, dried over  $\text{Na}_2\text{SO}_4$  and concentrated under reduced pressure. The crude product was purified by column chromatography to afford corresponding alkenes.

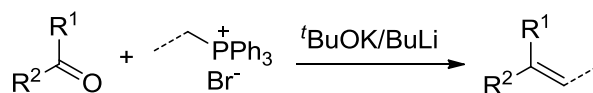

#### The Preparation of Alkenes (Method C)

**Method C:** To a suspension of Me/EtPPh<sub>3</sub>Br (32.40 g, 75.0 mmol, 1.5 equiv.) in THF (120.00 mL), <sup>t</sup>BuOK (8.98 g, 80.0 mmol, 1.5 equiv.) was added portionwise. The reaction was allowed to stir at room temperature for 30 min. It was then cooled to 0 °C and a solution of corresponding ketone (50.0 mmol, 1.0 equiv.) in THF (50.00 mL) was added dropwise. The mixture was warmed to 70 °C for 1 h. The reaction was quenched with water. The aqueous phase was extracted with Et<sub>2</sub>O three times. The organic fractions were washed with brine, dried over Na<sub>2</sub>SO<sub>4</sub> and concentrated under reduced pressure. The crude product was purified by column chromatography to afford corresponding alkenes.

## 2.2. Synthesis of phosphoryl oxime ethers

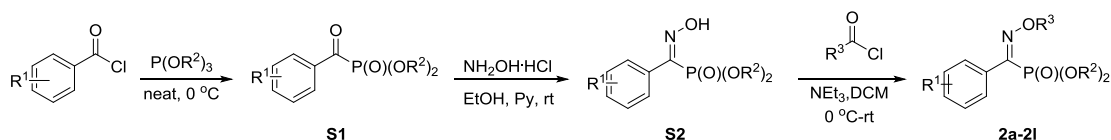

2a-2l were synthesized according to the preference<sup>[1]</sup>.

### Synthesis of S1

To a 100 mL round bottom flask equipped with a magnetic stir bar was charged with benzoyl chloride (1.05 equiv) was added the triethyl phosphate (1.0 equiv) at 0 °C, then the mixture was stirred for 2 h to give the **S1**, which could be used for the next step without further purification.

### Synthesis of S2

The above afforded **S1** was solved with EtOH (40 mL), and to the mixture was added hydroxylamine hydrochloride (1.1 equiv) and pyridine (1.2 equiv). Then the mixture was stirred overnight at rt. Quenched the reaction with 1N HCl (aq), and extracted with EA, washed by water and brine. The organic phase was collected and the solvent was removed under vacuum to give the crude product **S2**, which could be used for the next step without further purification.

### Synthesis of 2a-2l

The above afforded **S2** was solved with DCM (40 mL), and to the mixture was added triethylamine (1.2 equiv) and benzoyl chloride (1.05 equiv) at 0 °C. Then the mixture was allowed to rt and stirred overnight to give the final product after purification by chromatography (the product was storability and stability toward moisture and oxygen.)

## 3. General Procedures.

### 3.1. General procedure for Phosphoryl radical onto alkenes

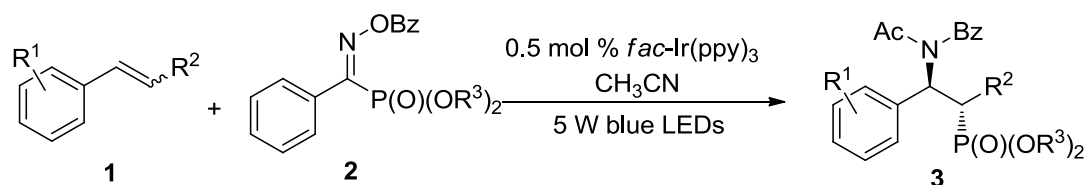

A 10.00 mL round bottom flask equipped with a rubber septum and magnetic stir bar was charged with alkenes (0.6 mmol, 1.5 equiv.), *fac*-Ir(ppy)<sub>3</sub> (0.002 mmol, 0.5 mol %), phosphorus reagents (0.4 mmol, 1.0 equiv.). The flask was evacuated and backfilled with Ar for 3 times. CH<sub>3</sub>CN (2.00 mL, 0.2 M) were added with syringe under Ar. The mixture was then irradiated by a 5 W blue

LED lamp (away from tube 5-10 cm) at room temperature for 8 h (monitored by TLC). After substrate was consumed and the solvent was removed under vacuum, the residue was purified by column chromatography (petroleum: isopropanol = 20:1), to give the product.

### 3.2. Procedure for Phosphoryl radical onto alkenes of 2a

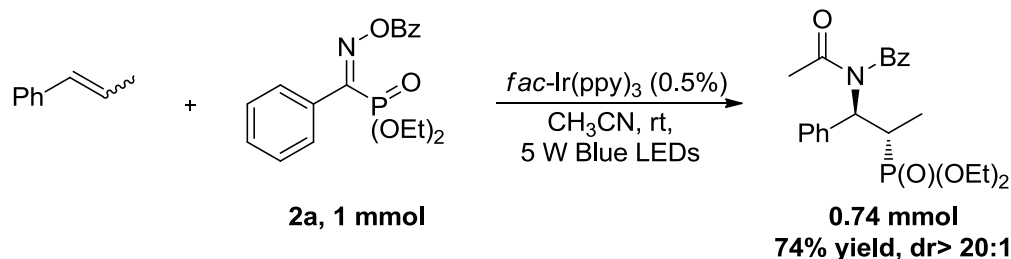

A 10.00 mL round bottom flask equipped with a rubber septum and magnetic stir bar was charged with alkenes (1.5 mmol, 1.5 equiv.), *fac*-Ir(ppy)<sub>3</sub> (0.005 mmol, 0.5 mol %), phosphorus reagents (1.0 mmol, 1.0 equiv.). The flask was evacuated and backfilled with Ar for 3 times. CH<sub>3</sub>CN (5.00 mL, 0.2 M) were added with syringe under Ar. The mixture was then irradiated by a 5 W blue LED lamp (away from tube 5-10 cm) at room temperature for 8 h (monitored by TLC). After substrate was consumed and the solvent was removed under vacuum, the residue was purified by column chromatography (petroleum: isopropanol = 20:1), to give the product **3a** in 78% yield (dr > 20:1).

*diethyl (1-(N-acetylbenzamido)-1-phenylpropan-2-yl)phosphonate (3a)*: yellow liquid, <sup>1</sup>H NMR (400 MHz, CDCl<sub>3</sub>) δ 7.54 (d, *J* = 7.0 Hz, 2H), 7.50 (t, *J* = 7.3 Hz, 1H), 7.42-7.34 (m, 4H), 7.29-7.21 (m, 3H), 5.95 (t, *J* = 7.3 Hz, 1H), 3.96-3.74 (m, 3H), 3.74-3.62 (m, 1H), 3.62-3.46 (m, 1H), 1.79 (s, 3H), 1.41 (dd, *J* = 17.2, 7.2 Hz, 3H), 1.09 (t, *J* = 7.1 Hz, 3H), 1.05 (t, *J* = 7.0 Hz, 3H); <sup>13</sup>C NMR (101 MHz, CDCl<sub>3</sub>) δ 174.52, 172.89, 138.17, 136.57, 132.94, 129.28, 128.84, 128.59, 128.00, 127.95, 125.67, 61.43 (t, *J* = 7.7 Hz), 33.89 (d, *J* = 138.5 Hz), 27.35, 16.15, 16.09, 15.97, 15.90 (dd, *J* = 18.1, 12.1 Hz), 12.74 (d, *J* = 5.5 Hz); <sup>31</sup>P NMR (162 MHz, CDCl<sub>3</sub>) δ 33.35, 30.51. HRMS calcd for C<sub>22</sub>H<sub>28</sub>NNaO<sub>5</sub>P<sup>+</sup>: [M+Na]<sup>+</sup> 440.1597, found 440.1597.

## 4. Mechanism studies.

### 4.1. Radical trapping experiment

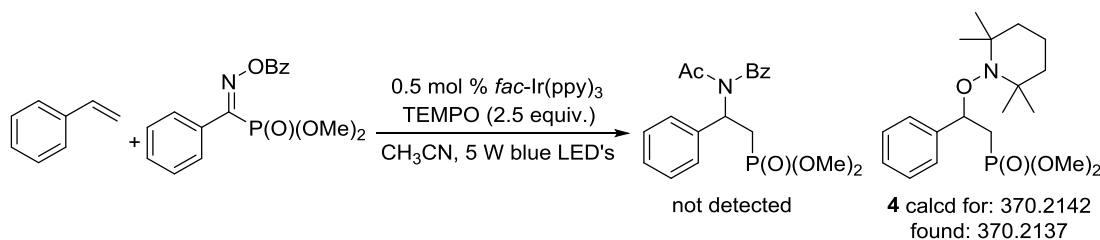

A 10.00 mL round bottom flask equipped with a rubber septum and magnetic stir bar was charged with alkenes (0.6 mmol, 1.5 equiv.), *fac*-Ir(ppy)<sub>3</sub> (0.002 mmol, 0.5 mol %) TEMPO (1 mmol, 2.5 equiv.) and phosphorus reagents (0.4 mmol, 1.0 equiv.). The flask was evacuated and backfilled with Ar for 3 times. CH<sub>3</sub>CN (2.00 mL, 0.2 M) were added with syringe under Ar. The mixture was then irradiated by a 5 W blue LED lamp (away from tube 5-10 cm) at room temperature for 8 h (monitored by TLC). After substrate was consumed, the reaction was completely inhibited by TEMPO and no **3a** was formed. The compound **4** and [4-TEMPOH] were

detected by HRMS.

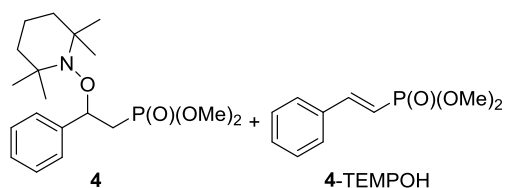

*dimethyl (2-phenyl-2-((2,2,6,6-tetramethylpiperidin-1-yl)oxy)ethyl)phosphonate (4)*: HRMS calcd for  $C_{19}H_{33}NO_4P^+$ :  $[M + H]^+$  370.2142, found 370.2137; **[4-TEMPOH]** calcd for  $C_{10}H_{13}NaO_3P^+$ :  $[M + Na]^+$  370.2142, found 370.2137

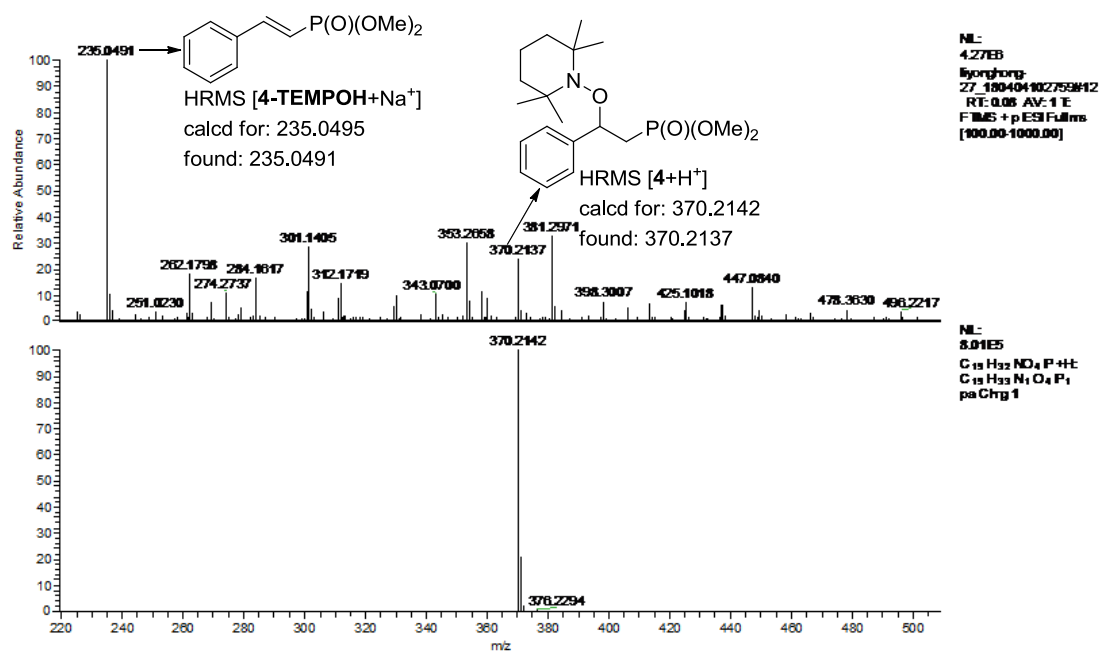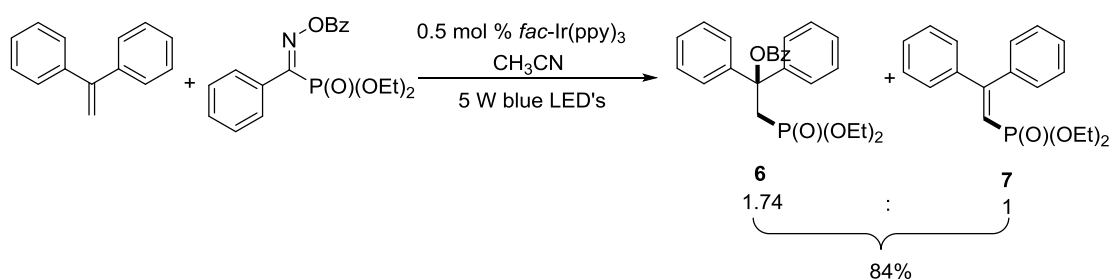

A 10.00 mL round bottom flask equipped with a rubber septum and magnetic stir bar was charged with ethene-1,1-diyldibenzene (0.6 mmol, 1.5 equiv.), *fac*-Ir(ppy)<sub>3</sub> (0.002 mmol, 0.5 mol %) and phosphorus reagents (0.4 mmol, 1.0 equiv.). The flask was evacuated and backfilled with Ar for 3 times. CH<sub>3</sub>CN (2.00 mL, 0.2 M) were added with syringe under Ar. The mixture was then irradiated by a 5 W blue LED lamp (away from tube 5-10 cm) at room temperature for 8 h (monitored by TLC). After substrate was consumed and the solvent was removed under vacuum, the residue was purified by column chromatography (petroleum: isopropanol = 20:1), to give the product.

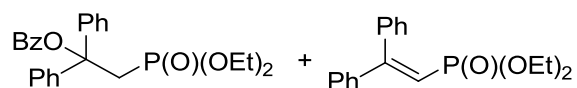

2-(diethoxyphosphoryl)-1,1-diphenylethyl benzoate (6)/diethyl (2,2-diphenylvinyl)phosphonate(7): 131 mg, white solid, total yield: 84%, 1.74:1.  $^1\text{H}$  NMR (400 MHz,  $\text{CDCl}_3$ )  $\delta$  8.19 (d,  $J = 7.1$  Hz, 2H), 7.57 (t,  $J = 7.4$  Hz, 1H), 7.49-7.36 (m, 6H), 7.38 (s, 3H), 7.36-7.26 (m, 8H), 7.21 (t,  $J = 7.3$  Hz, 2H), 6.20 (d,  $J = 15.6$  Hz, 0.6H), 3.99-3.74 (m, 4H), 3.65 (d,  $J = 20.2$  Hz, 2H), 3.63-3.52 (m, 1H), 1.12 (t,  $J = 7.1$  Hz, 4H), 0.91 (t,  $J = 7.1$  Hz, 6H);  $^{13}\text{C}$  NMR (101 MHz,  $\text{CDCl}_3$ )  $\delta$  164.55, 159.96, 159.90, 144.77, 144.69, 141.36, 141.14, 138.72, 138.64, 132.74, 131.21, 129.63, 129.55, 129.53, 129.49, 129.22, 128.49, 128.23, 128.14, 128.12, 128.02, 127.96, 127.65, 127.01, 125.17, 115.41, 113.49, 82.32 (d,  $J = 6.2$  Hz), 61.31 (dd,  $J = 12.2$  Hz, 6.0 Hz), 34.13 (d,  $J = 142.5$  Hz), 15.97 (d,  $J = 6.8$  Hz), 15.75 (d,  $J = 6.6$  Hz);  $^{31}\text{P}$  NMR (162 MHz,  $\text{CDCl}_3$ )  $\delta$  25.07, 16.70.

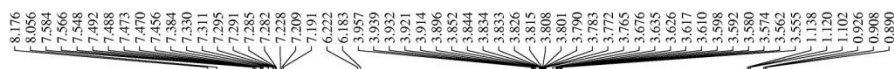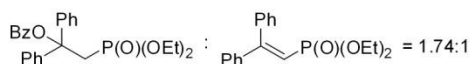

6 : 7

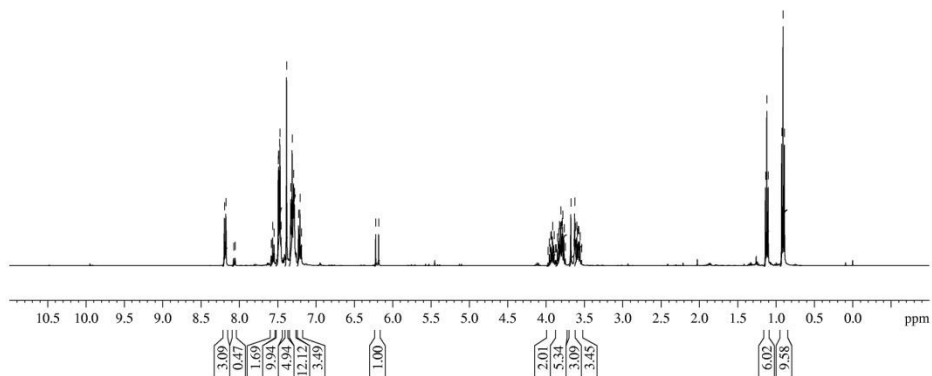

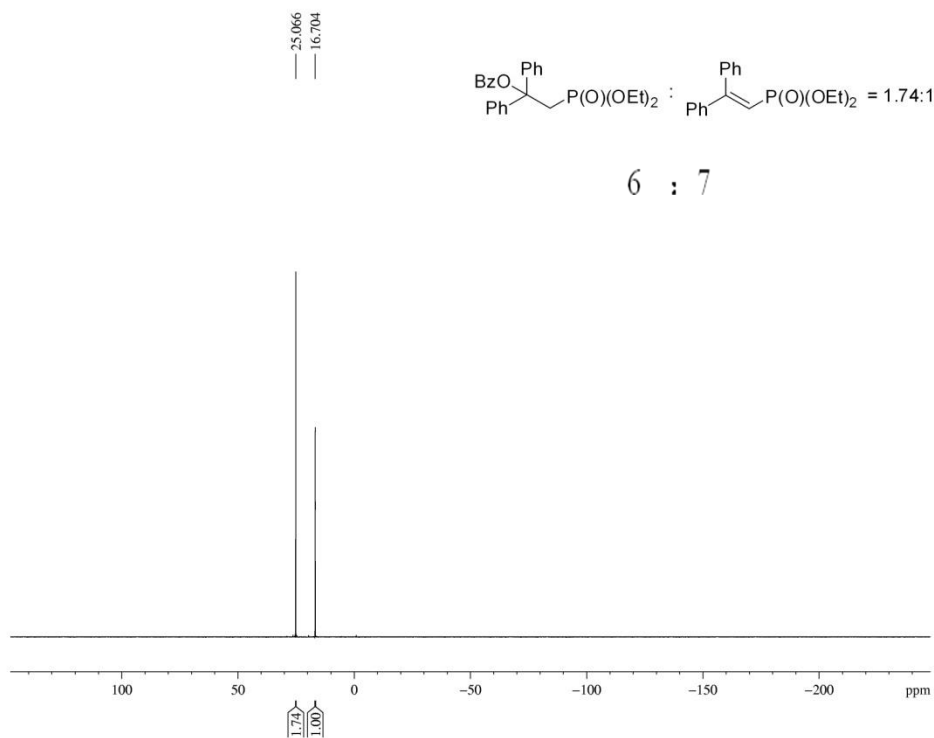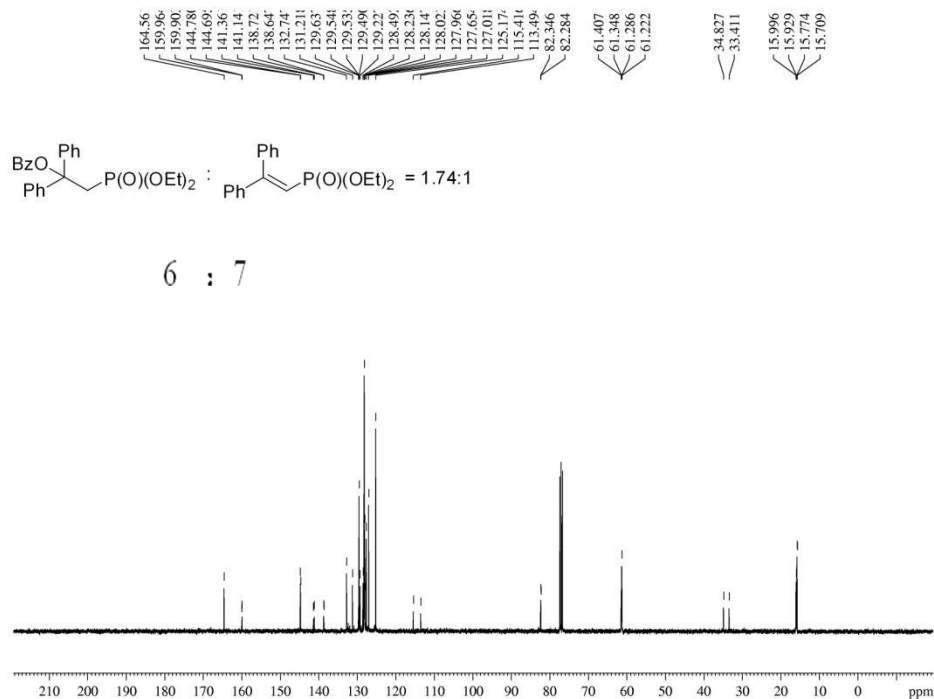

## 4.2. Iminyl radical trapping experiment

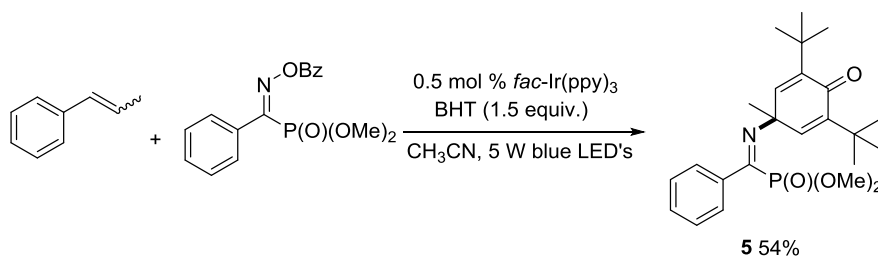

A 10.00 mL round bottom flask equipped with a rubber septum and magnetic stir bar was charged with ethene-1,1-diyldibenzene (0.6 mmol, 1.5 equiv.), *fac*-Ir(ppy)<sub>3</sub> (0.002 mmol, 0.5 mol %), BHT (0.6 mmol, 1.5 equiv.) and phosphorus reagents (0.4 mmol, 1.0 equiv.). The flask was evacuated and backfilled with Ar for 3 times. CH<sub>3</sub>CN (2.00 mL, 0.2 M) were added with syringe under Ar. The mixture was then irradiated by a 5 W blue LED lamp (away from tube 5-10 cm) at room temperature for 8 h (monitored by TLC). After substrate was consumed and the solvent was removed under vacuum, the residue was purified by column chromatography (petroleum: isopropanol = 20:1), to give the product.

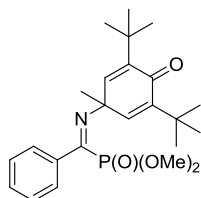

*dimethyl ((2,6-di-tert-butyl-4-methylphenoxy)imino)(phenyl)methylphosphonate* (**5**): 93 mg, yellow liquid, yield: 54%. <sup>1</sup>H NMR (400 MHz, CDCl<sub>3</sub>) δ 7.31 (t, *J* = 7.4 Hz, 1H), 7.21 (t, *J* = 7.6 Hz, 2H), 7.14 (d, *J* = 8.0 Hz, 2H), 6.47 (s, 2H), 3.80 (d, *J* = 10.7 Hz, 6H), 1.60 (s, 3H), 1.03 (s, 18H); <sup>13</sup>C NMR (101 MHz, CDCl<sub>3</sub>) δ 185.56, 171.20 (d, *J* = 217.5 Hz), 143.79, 142.82 (d, *J* = 2.2 Hz), 135.10 (d, *J* = 30.5 Hz), 129.97, 128.06 (d, *J* = 1.8 Hz), 126.82 (d, *J* = 3.9 Hz), 62.84 (d, *J* = 31.6 Hz), 54.23 (d, *J* = 217.5 Hz), 34.33, 32.49, 28.98; <sup>31</sup>P NMR (162 MHz, CDCl<sub>3</sub>) δ 7.44. HRMS calcd for C<sub>24</sub>H<sub>34</sub>NNaO<sub>4</sub>P<sup>+</sup>: [M+Na]<sup>+</sup> 454.2118, found 454.2114.



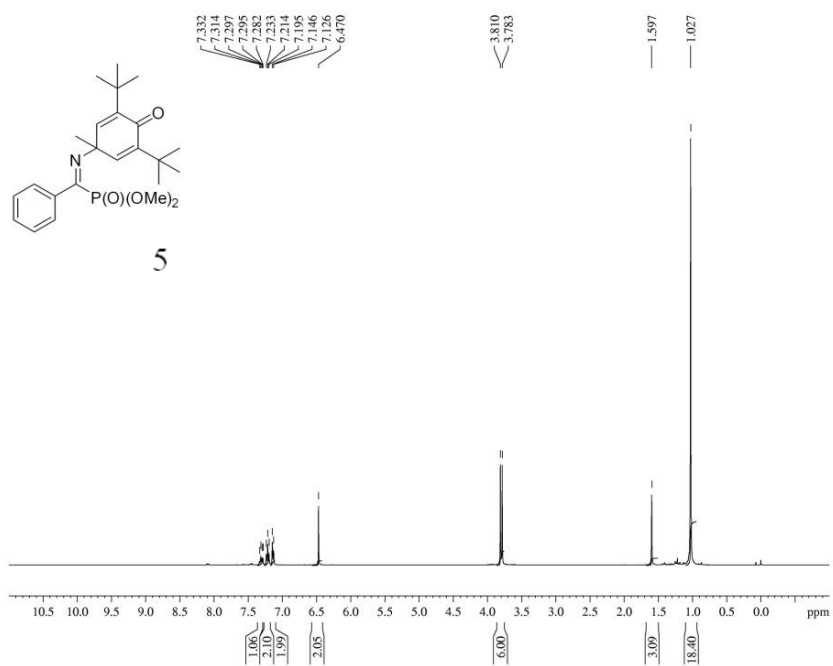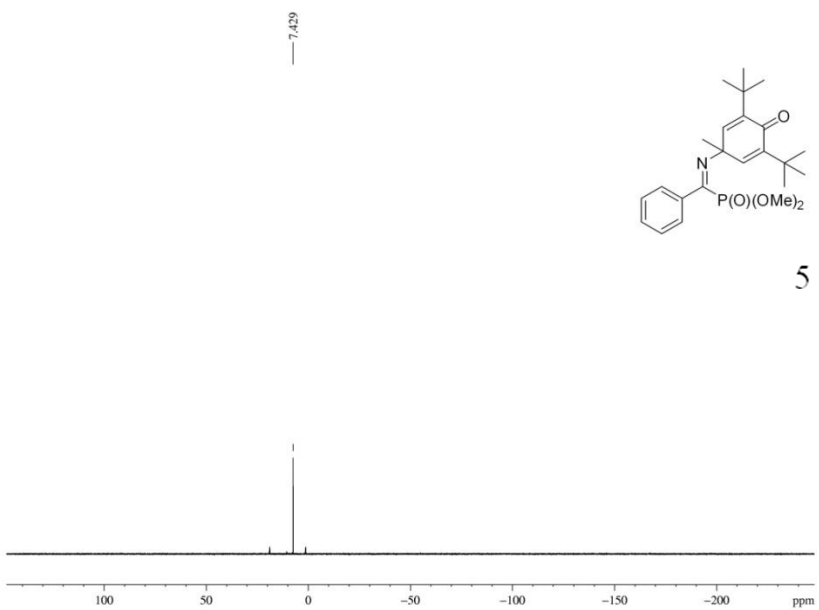

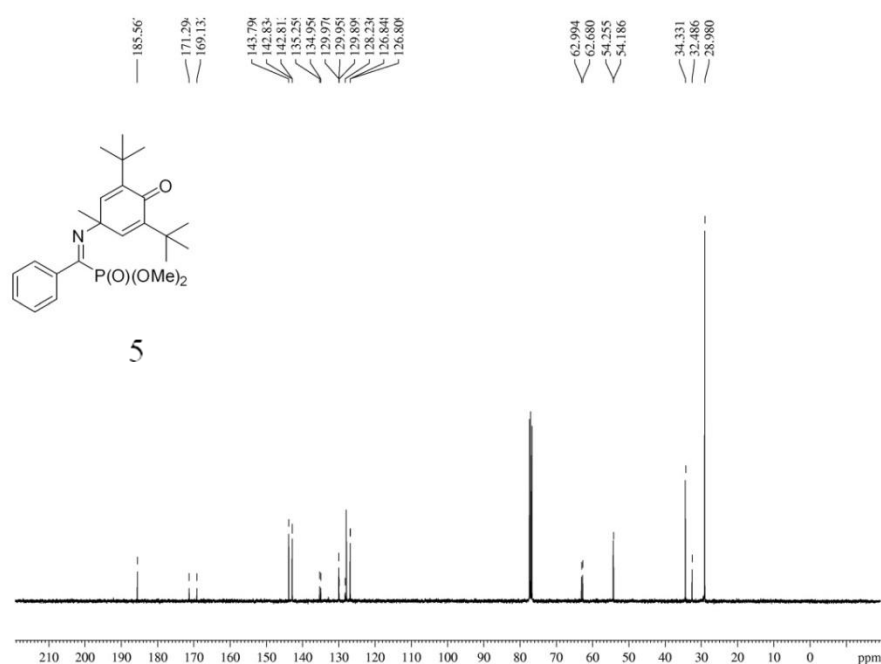

### 4.3. Clock experiment

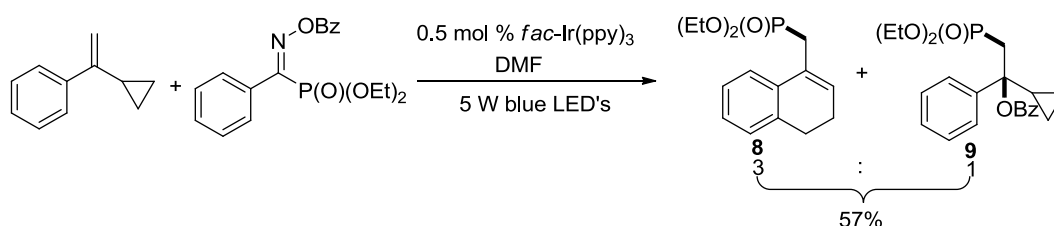

A 10.00 mL round bottom flask equipped with a rubber septum and magnetic stir bar was charged with (1-cyclopropylvinyl)benzene (0.6 mmol, 1.5 equiv.), *fac*-Ir(ppy)<sub>3</sub> (0.002 mmol, 0.5 mol %) and phosphorus reagents (0.4 mmol, 1.0 equiv.). The flask was evacuated and backfilled with Ar for 3 times. DMF (2.00 mL, 0.2 M) were added with syringe under Ar. The mixture was then irradiated by a 5 W blue LED lamp (away from tube 5-10 cm) at room temperature for 8 h (monitored by TLC). After substrate was consumed and the solvent was removed under vacuum, the residue was purified by column chromatography (petroleum: isopropanol = 20:1), to give the product.

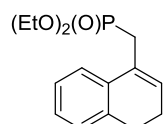

Diethyl ((3,4-dihydronaphthalen-1-yl)methyl)phosphonate (**8**): 50.4 mg, yellow liquid, yield: 45%. <sup>1</sup>H NMR (400 MHz, CDCl<sub>3</sub>) δ 7.42 (d, *J* = 7.3 Hz, 2H), 7.32 (t, *J* = 7.4 Hz, 2H), 5.92 (q, *J* = 6.9 Hz, 1H), 4.05-3.83 (m, 4H), 3.67 (t, *J* = 6.8 Hz, 3H), 3.12 (d, *J* = 22.5 Hz, 2H), 2.78 (qd, *J* = 6.9, 4.7 Hz, 2H), 1.15 (t, *J* = 7.1 Hz, 6H); <sup>31</sup>P NMR (121 MHz, CDCl<sub>3</sub>) δ 27.03. HRMS calcd for C<sub>24</sub>H<sub>34</sub>NNaO<sub>4</sub>P<sup>+</sup>: [M+H]<sup>+</sup> 281.1307, found 281.1303.

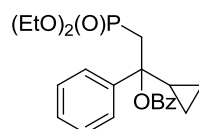

*1-cyclopropyl-2-(diethoxyphosphoryl)-1-phenylethyl benzoate (9)*: 24 mg, yellow liquid, yield: 15%.  $^1\text{H NMR}$  (400 MHz,  $\text{CDCl}_3$ )  $\delta$  8.11 (d,  $J = 7.6$  Hz, 2H), 7.57 (t,  $J = 7.3$  Hz, 1H), 7.46 (t,  $J = 7.5$  Hz, 2H), 7.38-7.21 (m, 5H), 4.07-3.76 (m, 4H), 3.39 (dd,  $J = 18.7, 15.4$  Hz, 1H), 3.13 (dd,  $J = 21.4, 15.3$  Hz, 1H), 2.18-1.99 (m, 1H), 1.16 (t,  $J = 7.0$  Hz, 3H), 0.98 (t,  $J = 7.1$  Hz, 3H), 0.60 (dd,  $J = 12.2, 5.3$  Hz, 1H), 0.48 (dt,  $J = 9.8, 5.1$  Hz, 2H), 0.23-0.13 (m, 1H);  $^{31}\text{P NMR}$  (162 MHz,  $\text{CDCl}_3$ )  $\delta$  25.94. HRMS calcd for  $\text{C}_{24}\text{H}_{34}\text{NNaO}_4\text{P}^+$ :  $[\text{M}+\text{Na}]^+$  454.2118, found 454.2114.

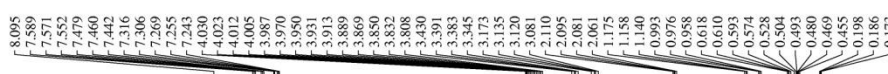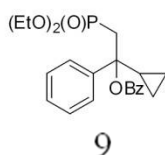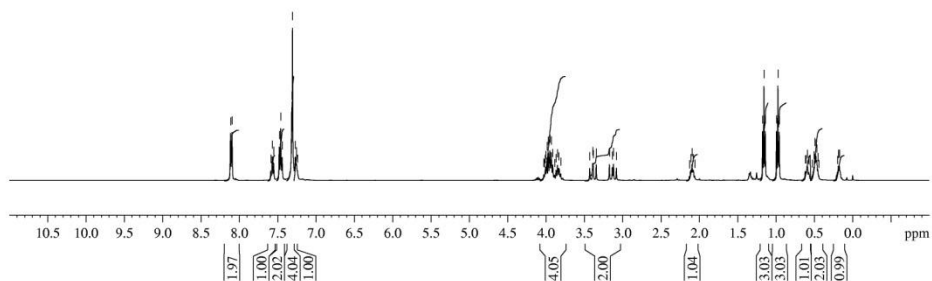

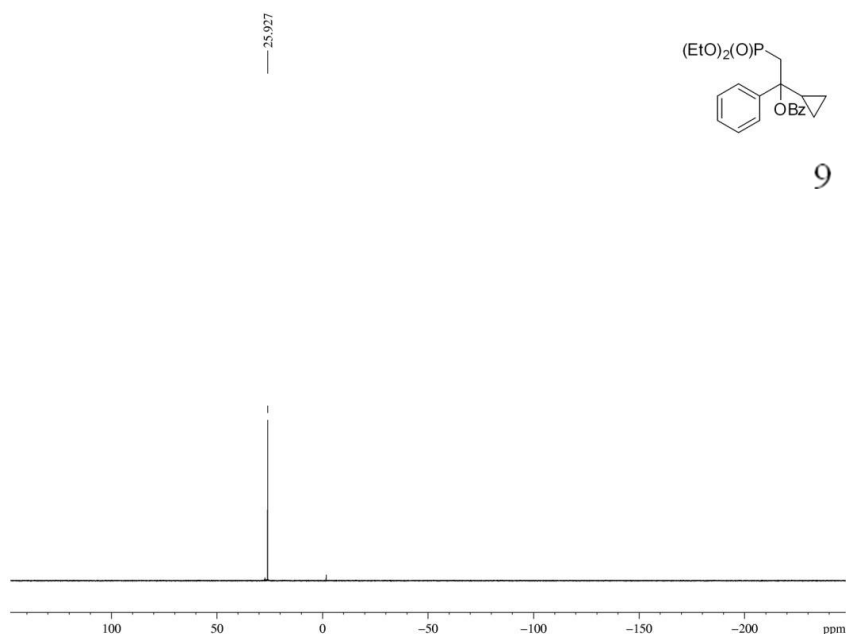

9

#### 4.4. Deuterium-labeled experiment

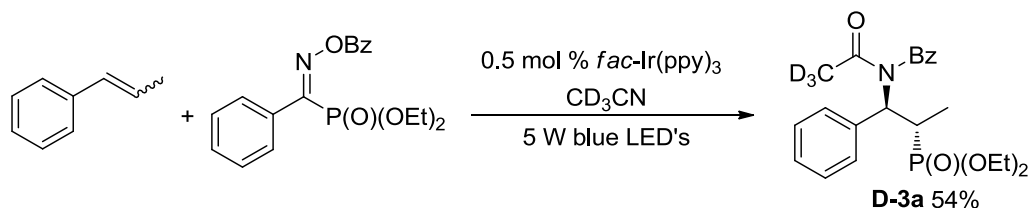

A 10.00 mL round bottom flask equipped with a rubber septum and magnetic stir bar was charged with prop-1-en-1-ylbenzene (0.6 mmol, 1.5 equiv.), *fac*-Ir(ppy)<sub>3</sub> (0.002 mmol, 0.5 mol %) and phosphorus reagents (0.4 mmol, 1.0 equiv.). The flask was evacuated and backfilled with Ar for 3 times. CD<sub>3</sub>CN (2.00 mL, 0.2 M) were added with syringe under Ar. The mixture was then irradiated by a 5 W blue LED lamp (away from tube 5-10 cm) at room temperature for 8 h (monitored by TLC). After substrate was consumed and the solvent was removed under vacuum, the residue was purified by column chromatography (petroleum: isopropanol = 20:1), to give the product.

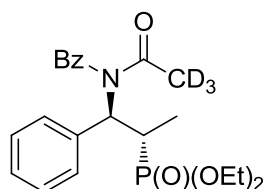

diethyl (1-(*N*-(acetyl-*d*3)benzamido)-1-phenylpropan-2-yl)phosphonate (**D-3a**): 90.7 mg, yellow liquid, yield: 54%, dr = 24:1. <sup>1</sup>H NMR (400 MHz, CDCl<sub>3</sub>) δ 7.75-7.21 (m, 10H), 5.97-5.91 (t, *J* = 24 Hz, 1H), 3.92-3.50 (m, 5H), 1.41-1.37 (dd, *J* = 8 Hz, 3H), 1.11-1.03 (td, *J* = 16.0 Hz, 6H); <sup>13</sup>C NMR (101 MHz, CDCl<sub>3</sub>) δ 174.55, 172.96, 138.30, 136.67, 132.93, 129.36, 128.86, 128.65, 127.97, 61.54 (t, *J*<sub>C-P</sub> = 7.1 Hz), 34.69, 33.31, 16.17 (dd, *J*<sub>C-P</sub> = 16.2 Hz), 12.81 (d, *J*<sub>C-P</sub> = 5.1 Hz); <sup>31</sup>P NMR (162 MHz, CDCl<sub>3</sub>) δ 30.46. HRMS calcd for C<sub>22</sub>H<sub>25</sub>D<sub>3</sub>NO<sub>5</sub>P: [M+H]<sup>+</sup> 421.1893, found 421.2439.

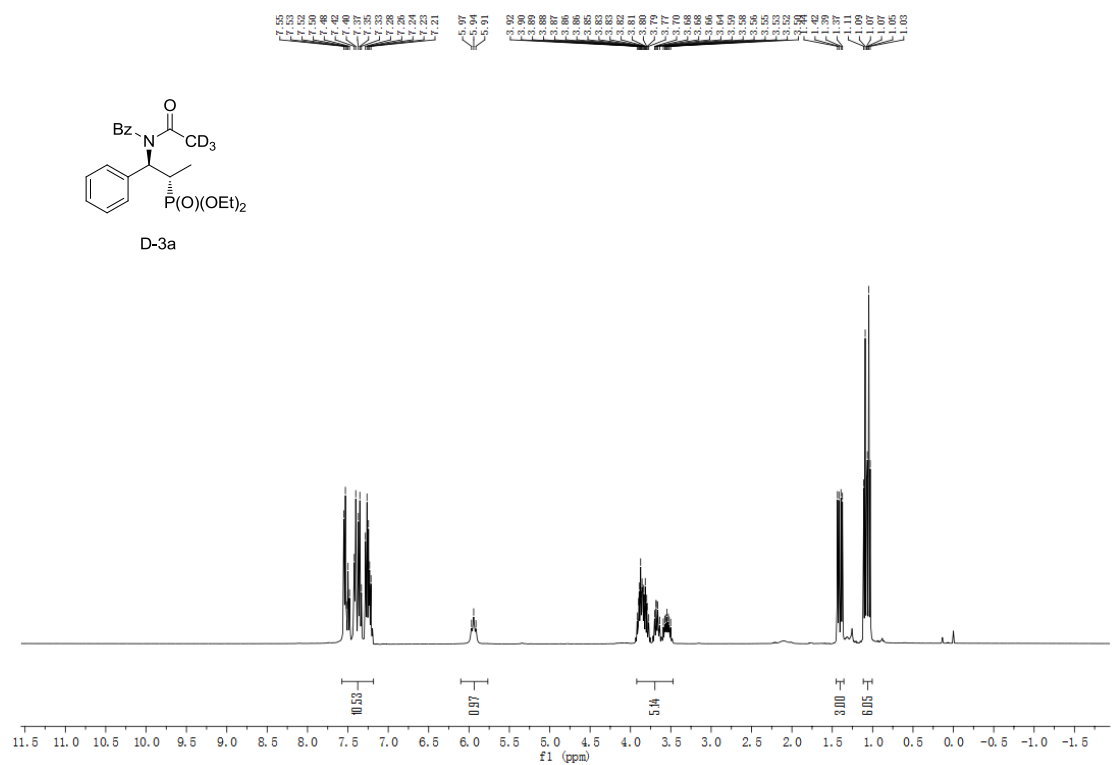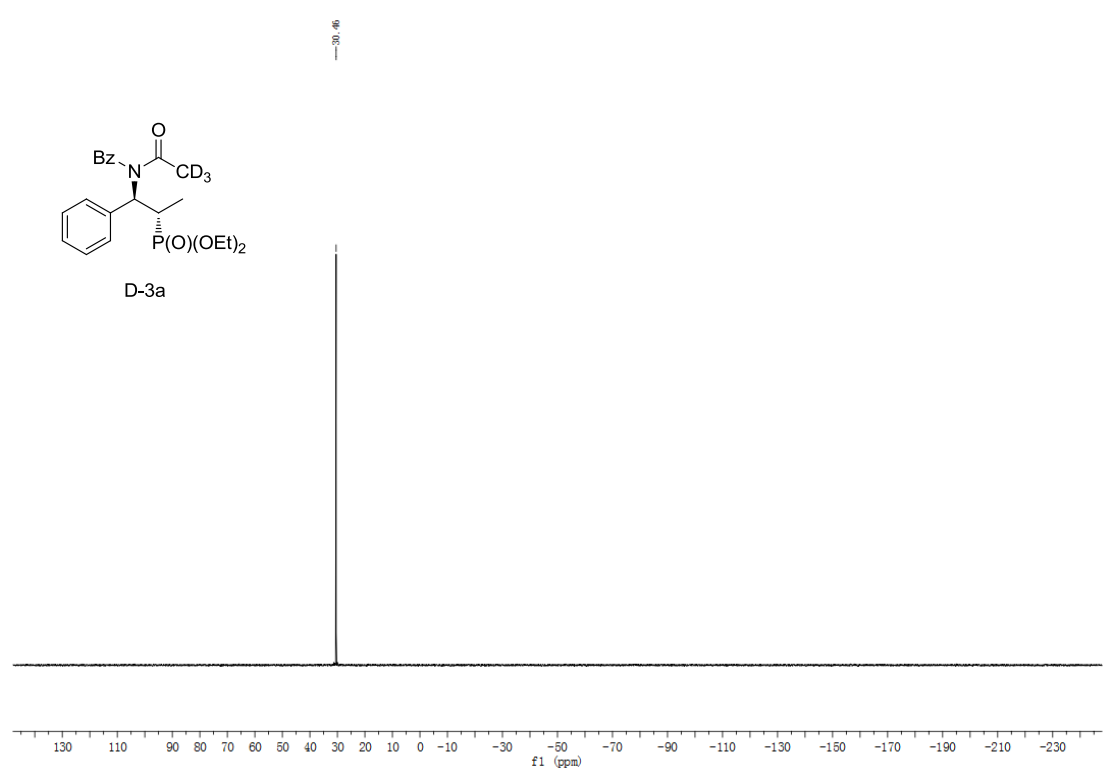

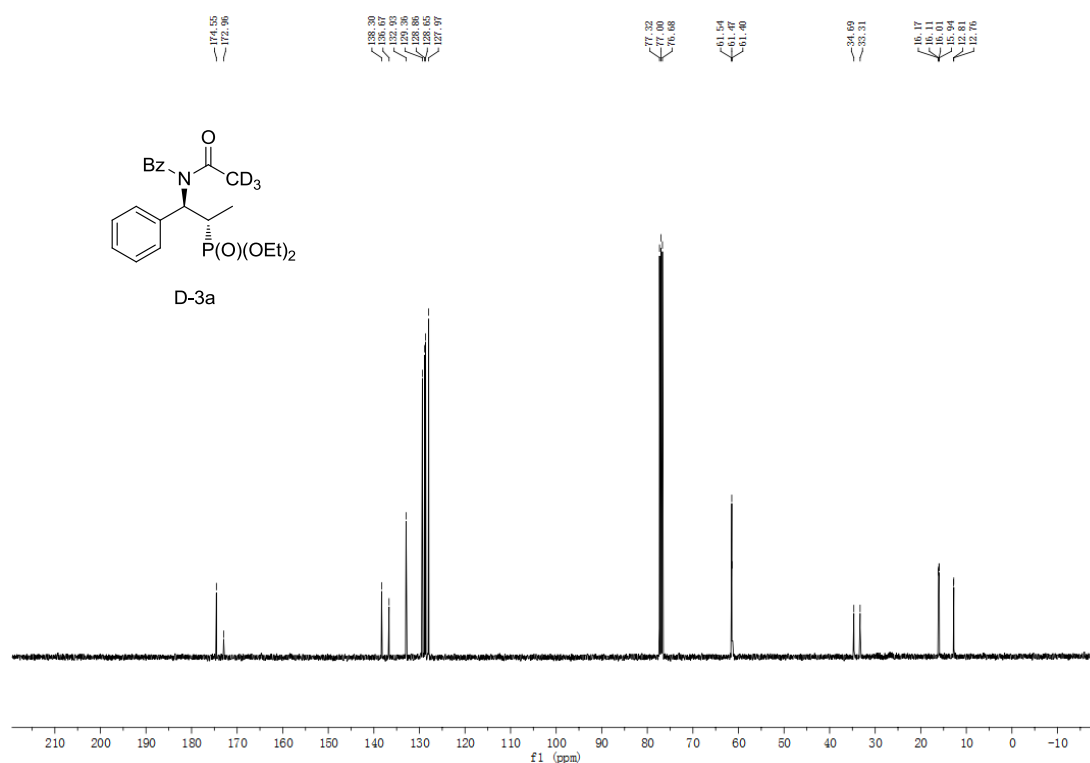

#### 4.6. Luminescence quenching experiments

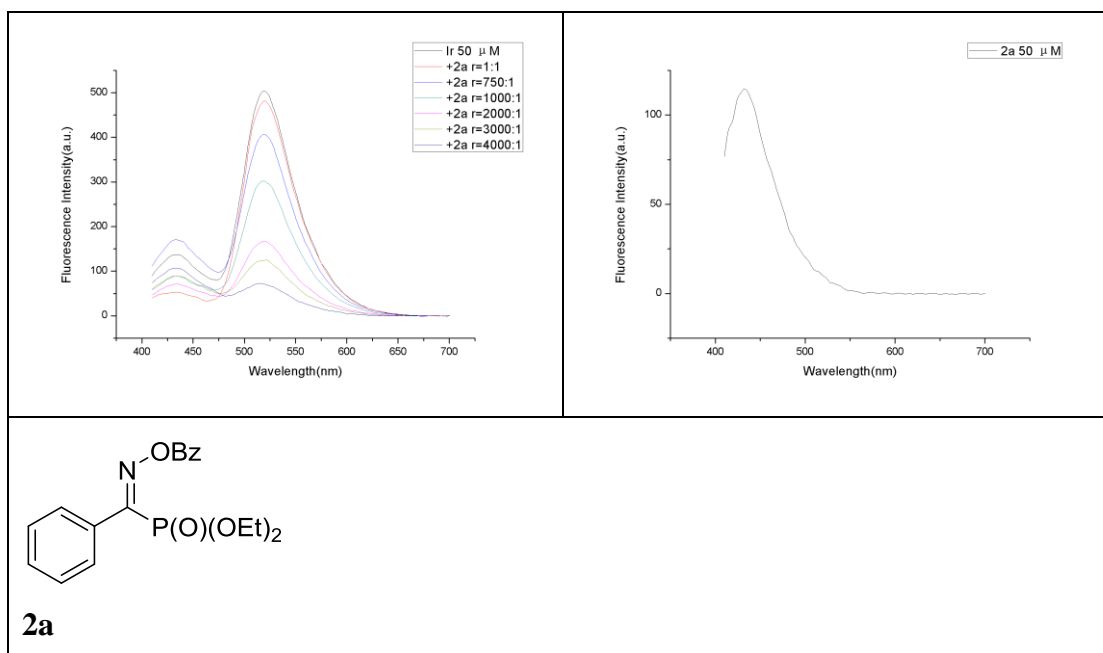

**Figure S1**

Fluorescence spectra were collected on Cary Eclipse Fluorescence Spectrophotometer. All *fac*-Ir(ppy)<sub>3</sub> solutions were excited at 382 nm and the emission intensity at 522 nm was observed. In a typical experiment, the emission spectrum of a  $1 \times 10^{-5}$  M solution of *fac*-Ir(ppy)<sub>3</sub> in CH<sub>3</sub>CN was collected. A significant decrease of *fac*-Ir(ppy)<sub>3</sub> luminescence was successfully observed in the presence of **2a** (Figure S1). This result suggested that it was the substrate **2a** that quenched the excited photocatalyst \**fac*-Ir(ppy)<sub>3</sub>.

#### 4.6 Cyclic voltammetry for compound 2a

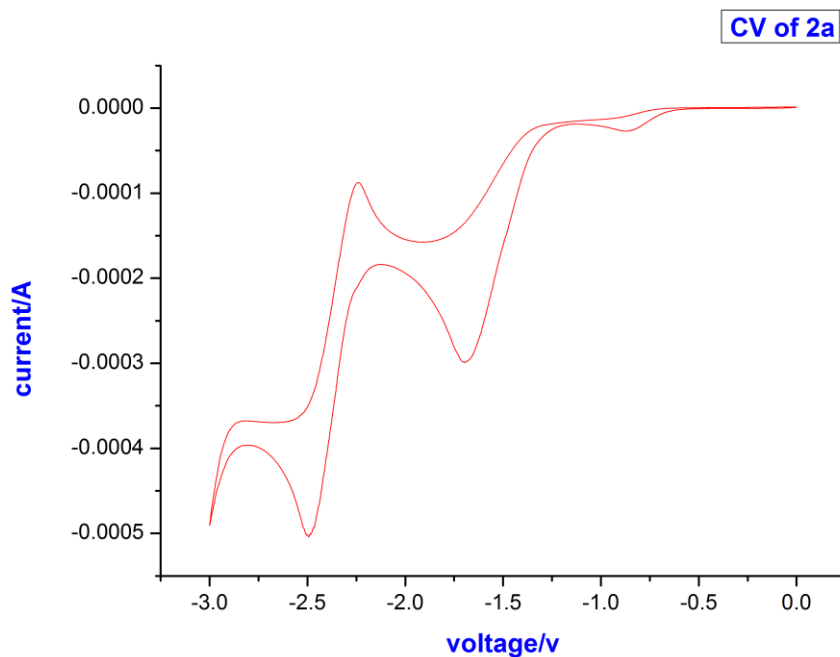

$$E_{2a} = -1.69 \text{ and } -2.48 \text{ versus SCE}$$

Cyclic voltammetry (CV) was taken using a CHI660D potentiostat. CV measurement of **2a** was carried out in 0.1 M of  $\text{Bu}_4\text{NPF}_6/\text{MeCN}$  at a scan rate of 100 mV/s. The working electrode is a glassy carbon, the counter electrode is a Pt wire, and the reference is SCE. Hence,  $E_{2a} = -1.69$  and  $-2.48$  versus SCE.  $E_{1/2}(\text{fac-Ir}(\text{ppy})_3^+/\text{fac-Ir}(\text{ppy})_3^*) = -1.73$  versus SCE. These results suggested the excited photocatalyst  $\text{Ir}(\text{ppy})_3^*$  reduces the o-benzoyl oxime substrate **2a**.

#### 4.7 Irradiation setup picture

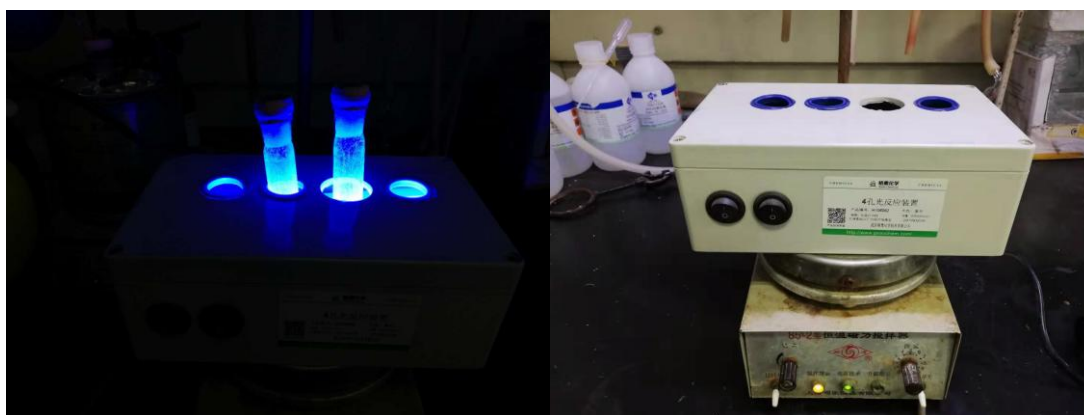

## 5. Removing the protecting groups

### 5.1 removing the Bz group<sup>2</sup>

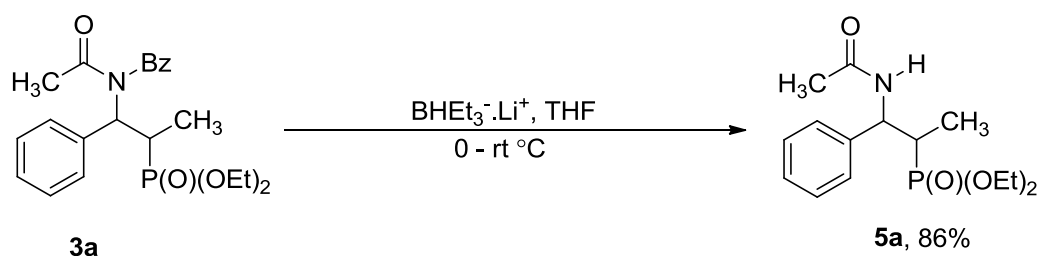

A 5.00 mL round bottom flask equipped with a rubber septum and magnetic stir bar was charged with diethyl (1-(*N*-acetylbenzamido)-1-phenylpropan-2-yl)phosphonate **3a** (0.3 mmol, 1.0 equiv.), 1.5ml  $\text{LiEt}_3\text{BH}$  (1M in THF) were dropwise added with syringe under Ar at 0 °C. Then stir at room temperature for 3h (monitored by TLC). After substrate was consumed and the solvent was removed under vacuum, the residue was purified by column chromatography (ethyl acetate: MeOH = 20:1) to give the product **5a** (colorless oil, 86 % yield).

#### Diethyl (1-(*N*-acetylamino)-1-phenylpropan-2-yl)phosphonate (**5a**)

$^1\text{H}$  NMR (400 MHz,  $\text{CDCl}_3$ )  $\delta$  7.47 (d,  $J = 8.3$  Hz, 1H), 7.30 (d,  $J = 4.3$  Hz, 4H), 7.29 – 7.18 (m, 1H), 5.29 (ddd,  $J = 25.0, 8.4, 4.4$  Hz, 1H), 4.13 – 4.02 (m, 2H), 3.98 – 3.89 (m, 1H), 3.89 – 3.80 (m, 1H), 2.39 – 2.27 (m, 1H), 2.03 (s, 3H), 1.31 (t,  $J = 7.1$  Hz, 3H), 1.15 – 1.04 (m, 6H).  $^{13}\text{C}$  NMR (101 MHz,  $\text{CDCl}_3$ )  $\delta$  169.43 (s), 139.12 (d,  $J = 8.4$  Hz), 128.12 (s), 127.36 (s), 127.14 (s), 61.84 (dd,  $J = 38.7, 7.0$  Hz), 53.29 (d,  $J = 3.6$  Hz), 36.79 (d,  $J = 138.9$  Hz), 23.43 (s), 16.27 (dd,  $J = 36.6, 6.0$  Hz), 10.98 (d,  $J = 4.5$  Hz).  $^{13}\text{C}$  NMR (101 MHz,  $\text{CDCl}_3$ )  $\delta$  169.43 (s), 139.12 (d,  $J = 8.4$  Hz), 128.12 (s), 127.36 (s), 127.14 (s), 61.84 (dd,  $J = 38.7, 7.0$  Hz), 53.29 (d,  $J = 3.6$  Hz), 36.79 (d,  $J = 138.9$  Hz), 23.43 (s), 16.27 (dd,  $J = 36.6, 6.0$  Hz), 10.98 (d,  $J = 4.5$  Hz). IRMS calcd for  $\text{C}_{15}\text{H}_{24}\text{NNaO}_4\text{P}^+$ :  $[\text{M}+\text{Na}]^+$ : 336.1341, found 336.2203.

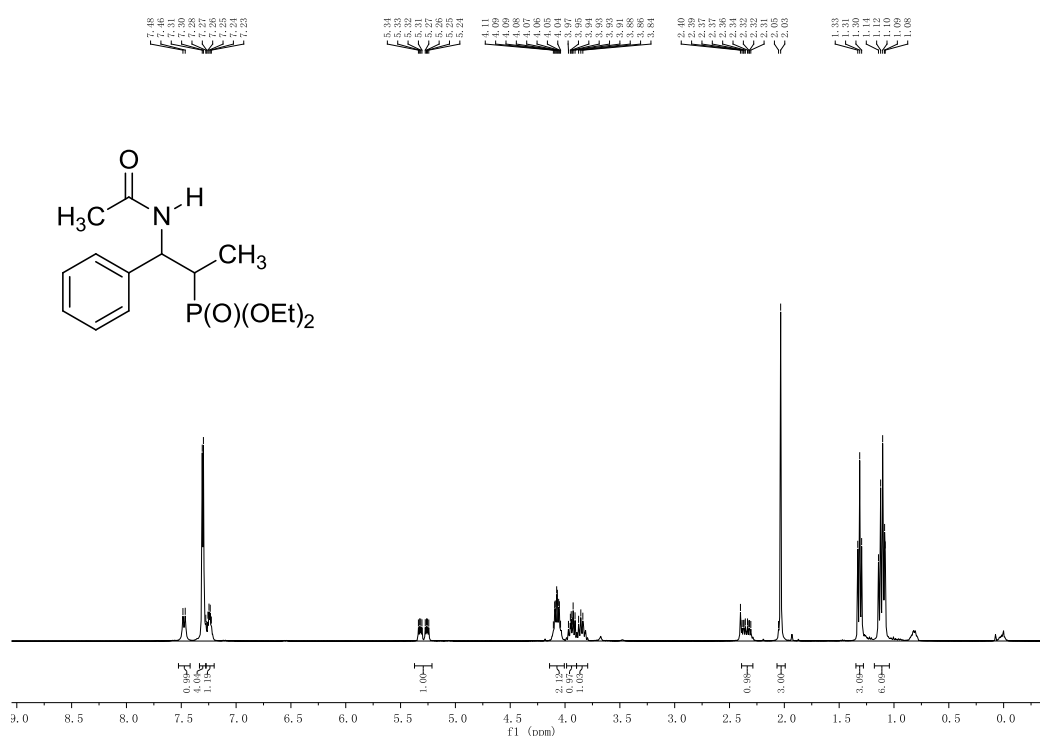



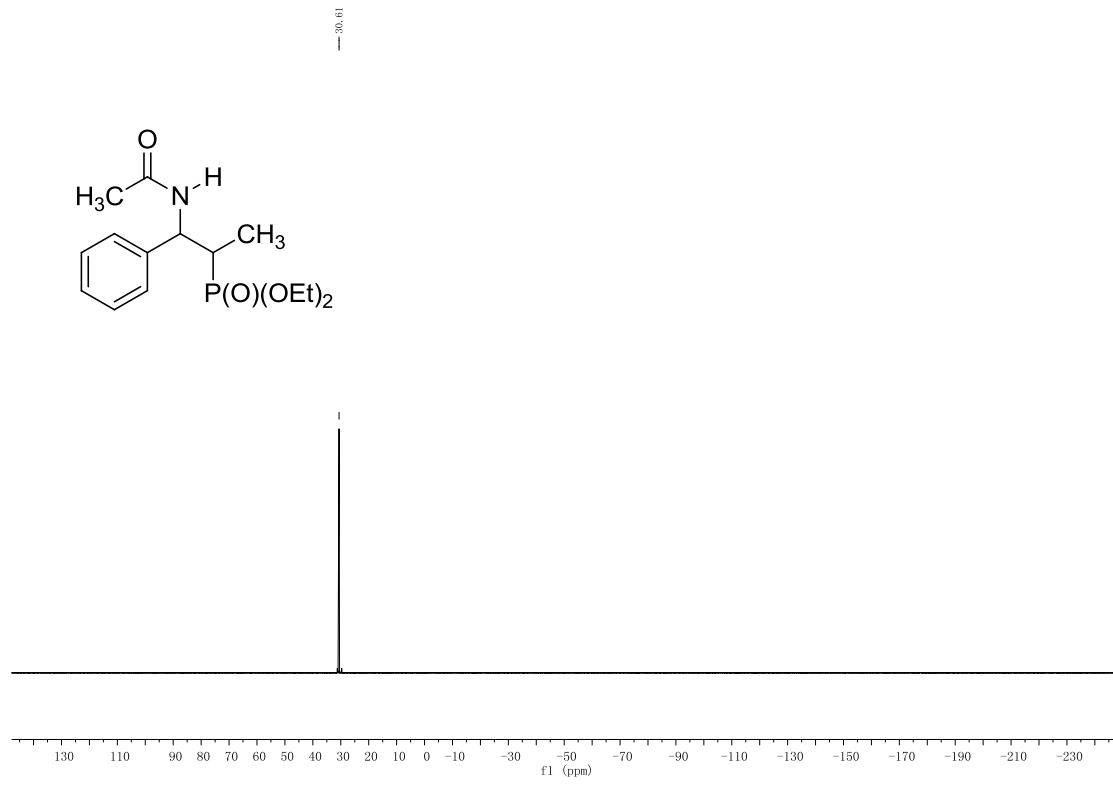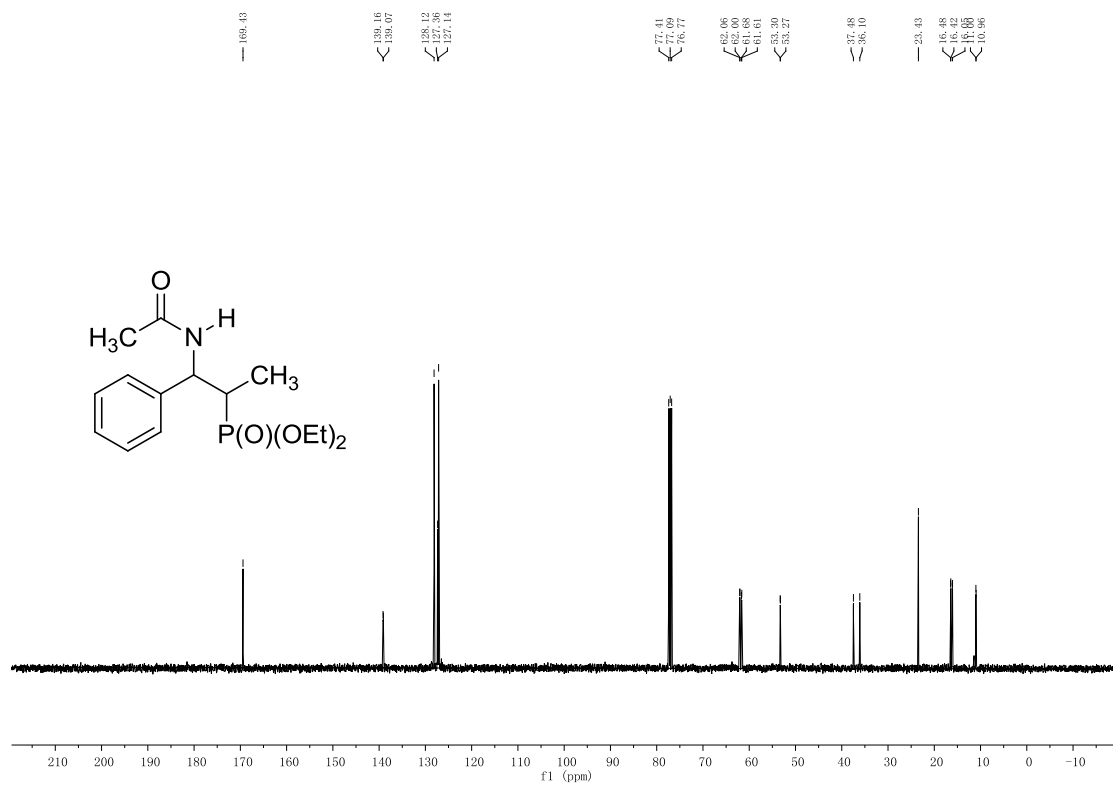

## 5.2 hydrolysis of phosphonate

The procedure is same as our former report for published in *Chem. Eur. J.* **2018**, *24*, 14363.

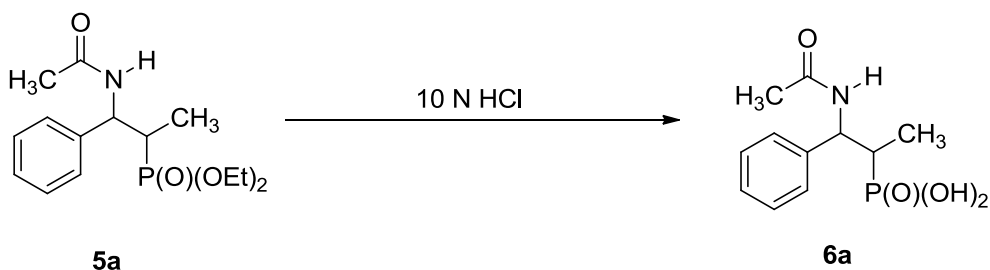

## 6. Applications

### 6.1. Intramolecular cyclization reaction

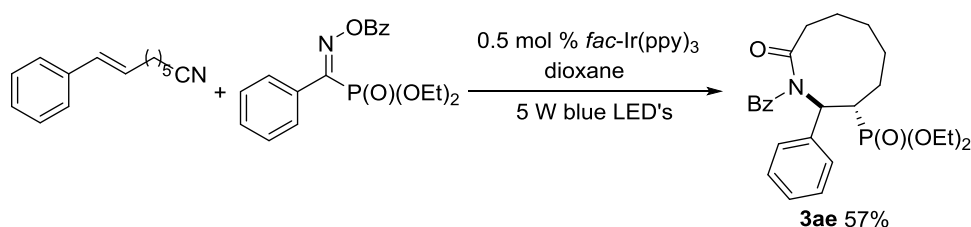

A 10.00 mL round bottom flask equipped with a rubber septum and magnetic stir bar was charged with 4-phenylbut-3-enenitrile (0.6 mmol, 1.5 equiv.), *fac*-Ir(ppy)<sub>3</sub> (0.002 mmol, 0.5 mol %) and phosphorus reagents (0.4 mmol, 1.0 equiv.). The flask was evacuated and backfilled with Ar for 3 times. dioxane (2.00 mL, 0.2 M) were added with syringe under Ar. The mixture was then irradiated by a 5 W blue LED lamp (away from tube 5-10 cm) at room temperature for 8 h (monitored by TLC). After substrate was consumed and the solvent was removed under vacuum, the residue was purified by column chromatography (petroleum: isopropanol = 20:1), to give the product.

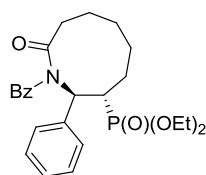

*diethyl (1-benzoyl-9-oxo-2-phenylazonan-3-yl)phosphonate (3ae)*: eluent (petroleum: isopropanol = 20:1), 98 mg, yellow liquid, yield: 57%, dr = 5:1. <sup>1</sup>H NMR (400 MHz, CDCl<sub>3</sub>) δ 8.12-8.14 (m, 2H), 7.53-7.62 (m, 1H), 7.48 (d, *J* = 7.4 Hz, 2H), 7.38-7.32 (m, 4H), 7.30-7.26 (m, 1H), 6.50 (dd, *J* = 8.9, 4.0 Hz, 1H), 4.11-3.95 (m, 1H), 2.34 (ddt, *J* = 21.6, 7.6, 4.2 Hz, 1H), 2.22 (t, *J* = 7.1 Hz, 2H), 2.01-1.88 (m, 1H), 1.82-1.67 (m, 1H), 1.58-1.49 (m, 3H), 1.38-1.28 (m, 3H), 1.24 (t, *J* = 7.0 Hz, 3H), 1.17 (t, *J* = 7.1 Hz, 3H); <sup>13</sup>C NMR (101 MHz, CDCl<sub>3</sub>) δ 164.97, 139.01 (d, *J* = 11.7 Hz), 133.12, 130.02, 129.93, 129.74, 129.69, 128.39, 128.38, 127.81, 127.24, 125.81, 119.57, 73.69 (d, *J* = 2.2 Hz), 61.94 (d, *J* = 25.8, 7.0 Hz), 43.84, 42.46, 28.27, 27.27 (d, *J* = 4.4 Hz), 24.78, 23.68 (d, *J* = 2.3 Hz), 16.84, 16.30 (d, *J* = 4.5 Hz), 16.24 (d, *J* = 4.7 Hz); <sup>31</sup>P NMR (162 MHz, CDCl<sub>3</sub>) δ 28.94. HRMS calcd for C<sub>23</sub>H<sub>30</sub>NNaO<sub>5</sub>P<sup>+</sup>: [M+Na]<sup>+</sup> 454.1754, found 454.1750.

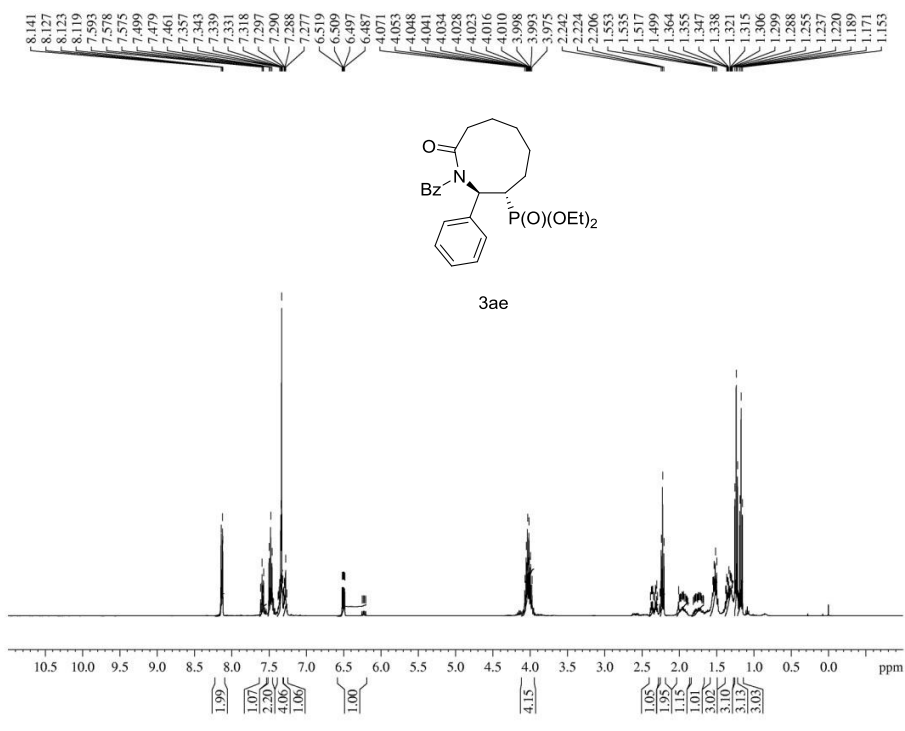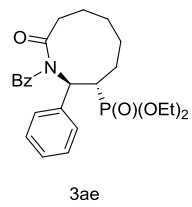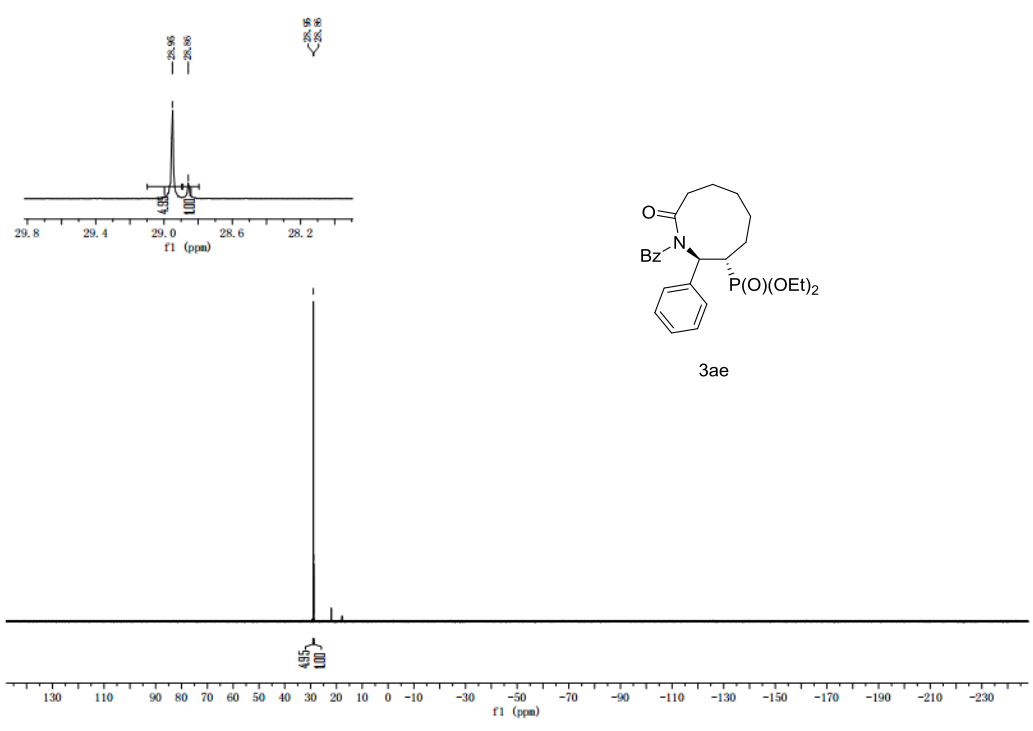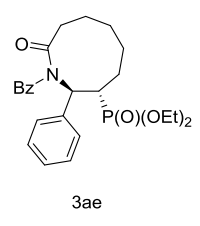

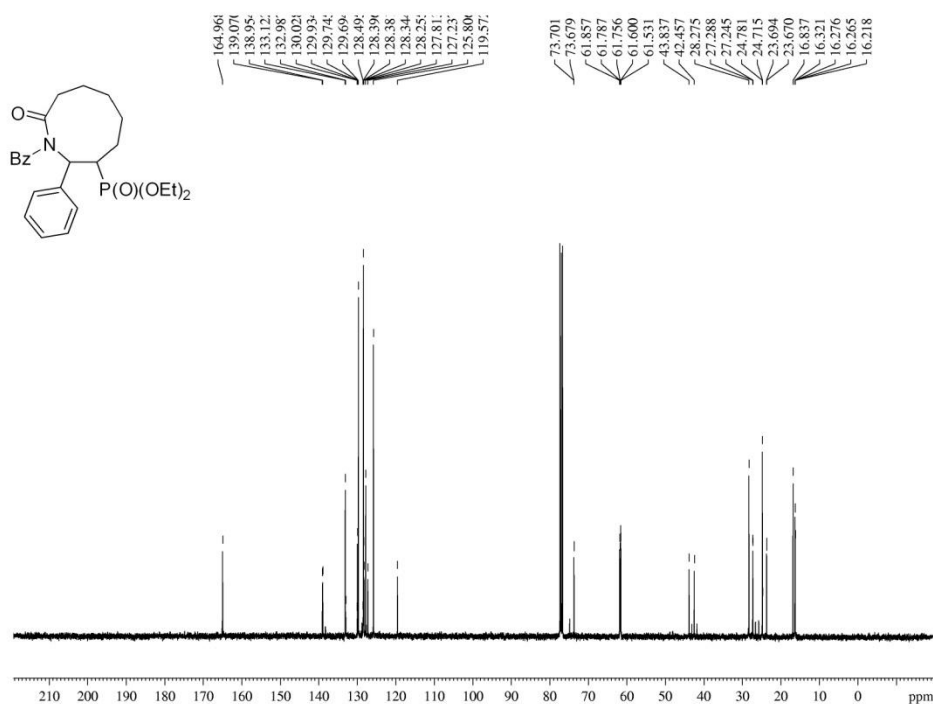

## 7. Reference

1.T.-I. Chudakova; Y.-V. Rassuakanaya; A.-A. Sinitsa; P.-P. Onyško, *Russian Journal of General Chemistry*. **2009**, 79, 195.

2. H. Tanaka, K. Ogasawara, *Tetrahedron Letters*, **2002**, 43, 4417.

## 8. Characterization data

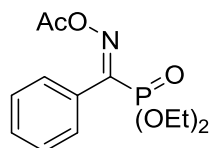

*diethyl((acetoxymino)(phenyl)methyl)phosphonate (2c)*:  $^1\text{H}$  NMR (600 MHz,  $\text{CDCl}_3$ )  $\delta$  7.59-7.55 (m, 2H), 7.45-7.39 (m, 3H), 4.28-4.13 (m, 4H), 2.12 (s, 2H), 1.33-1.25 (m, 6H);  $^{13}\text{C}$  NMR (152 MHz,  $\text{CDCl}_3$ )  $\delta$  167.8, 159.9, 158.1, 152.1, 150.6, 130.2, 129.8, 129.7, 129.2, 129.0, 128.9, 128.6, 128.3, 128.0, 64.3, 63.2, 19.3, 16.1. Eluent (petroleum: isopropanol = 20:1).

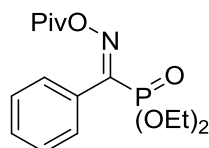

*diethyl((pivaloyloxymino)(phenyl)methyl)phosphonate (2d)*:  $^1\text{H}$  NMR (600 MHz,  $\text{CDCl}_3$ )  $\delta$  7.70-7.53 (m, 2H), 7.45-7.44 (m, 3H), 4.29-4.09 (m, 4H), 1.37-1.30 (m, 6H), 1.12 (s, 6H);  $^{13}\text{C}$  NMR (152 MHz,  $\text{CDCl}_3$ )  $\delta$  174.3, 160.9, 160.3, 159.6, 159.3, 132.4, 130.5, 130.2, 129.3, 129.1, 128.3, 128.1, 64.4, 63.1, 38.5, 26.9, 16.1. Eluent (petroleum: isopropanol = 20:1).

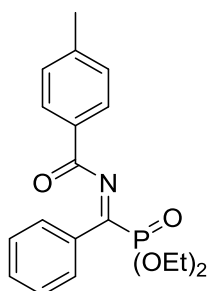

diethyl (((4-methylbenzoyl)imino)(phenyl)methyl)phosphonate (**2e**):  $^1\text{H}$  NMR (600 MHz,  $\text{CDCl}_3$ )  $\delta$  8.19-7.97 (m, 1H), 7.72-7.65 (m, 3H), 7.49-7.48 (m, 2H), 7.47-7.42 (m, 1H), 7.32-7.31 (m, 1H), 7.19-7.18 (m, 1H), 4.34-4.12 (m, 4H), 2.44-2.37 (m, 3H), 1.38-1.23 (m, 6H);  $^{13}\text{C}$  NMR (152 MHz,  $\text{CDCl}_3$ )  $\delta$  169.4, 163.1, 160.7, 144.7, 144.5, 143.8, 132.3, 130.5, 130.3, 130.2, 130.0, 129.7, 129.4, 129.3, 129.2, 129.1, 128.9, 128.4, 128.3, 127.1, 125.2, 125.1, 64.5, 21.7, 16.1. Eluent (petroleum: isopropanol = 20:1).

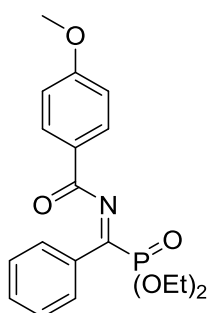

diethyl (((4-methoxybenzoyl)imino)(phenyl)methyl)phosphonate (**2f**):  $^1\text{H}$  NMR (600 MHz,  $\text{CDCl}_3$ )  $\delta$  8.27-8.25 (m, 1H), 7.79-7.72 (m, 3H), 7.50-7.42 (m, 3H), 7.01-6.99 (m, 1H), 6.87-6.85 (m, 1H), 4.33-4.10 (m, 4H), 3.88-3.82 (m, 3H), 1.38-1.26 (m, 6H);  $^{13}\text{C}$  NMR (152 MHz,  $\text{CDCl}_3$ )  $\delta$  164.0, 163.8, 162.7, 160.4, 159.4, 159.1, 132.3, 132.0, 131.8, 130.5, 130.3, 129.3, 129.1, 128.4, 128.3, 120.0, 113.9, 113.5, 64.4, 63.4, 55.4, 16.1. Eluent (petroleum: isopropanol = 20:1).

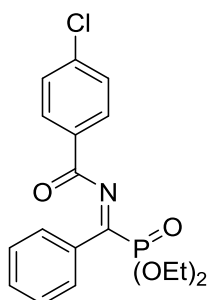

diethyl (((4-chlorobenzoyl)imino)(phenyl)methyl)phosphonate (**2g**):  $^1\text{H}$  NMR (600 MHz,  $\text{CDCl}_3$ )  $\delta$  7.75-7.74 (m, 2H), 7.64-7.63 (m, 2H), 7.57-7.50 (m, 3H), 7.37-7.36 (m, 2H), 4.33-4.30 (m, 4H), 1.38-1.36 (m, 6H);  $^{13}\text{C}$  NMR (152 MHz,  $\text{CDCl}_3$ )  $\delta$  162.2, 161.4, 160.1, 140.2, 131.4, 131.0, 129.3, 129.2, 128.9, 128.6, 128.4, 128.3, 126.5, 64.6, 16.2. Eluent (petroleum: isopropanol = 20:1).

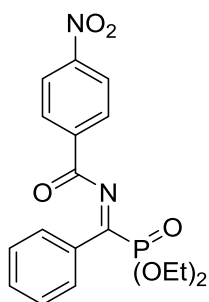

*diethyl (((4-nitrobenzoyl)imino)(phenyl)methyl)phosphonate (2h)*:  $^1\text{H}$  NMR (600 MHz,  $\text{CDCl}_3$ )  $\delta$  8.50-8.49 (m, 1H), 8.37-8.36 (m, 1H), 8.25-8.24 (m, 1H), 7.58-7.57 (m, 1H), 7.73-7.72 (m, 1H), 7.64-7.41 (m, 4H), 4.33-4.12 (m, 4H), 1.38-1.27 (m, 6H);  $^{13}\text{C}$  NMR (152 MHz,  $\text{CDCl}_3$ )  $\delta$  162.4, 162.3, 161.3, 161.2, 161.1, 150.9, 150.8, 133.5, 131.4, 130.9, 130.8, 130.7, 129.2, 129.1, 128.7, 128.6, 128.5, 128.2, 123.8, 64.6, 63.7, 63.3, 16.2. Eluent (petroleum: isopropanol = 20:1).

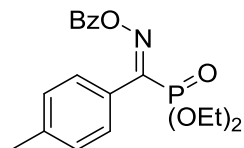

*Diethyl (((benzoyloxy)imino)(p-tolyl)methyl)phosphonate (2i)*:  $^1\text{H}$  NMR (600 MHz,  $\text{CDCl}_3$ )  $\delta$  8.31-8.29 (m, 1H), 7.88-7.86 (m, 1H), 7.67-7.60 (m, 2H), 7.54-7.50 (m, 1H), 7.43-7.39 (m, 1H), 7.31-7.24 (m, 2H), 4.34-4.13 (m, 4H), 2.42-2.39 (m, 3H), 1.38-1.26 (m, 6H);  $^{13}\text{C}$  NMR (152 MHz,  $\text{CDCl}_3$ )  $\delta$  168.6, 163.0, 162.9, 160.8, 159.8, 159.4, 140.9, 140.8, 133.6, 133.5, 132.8, 130.1, 129.8, 129.6, 129.1, 129.0, 128.5, 128.1, 128.0, 127.9, 126.1, 64.4, 63.3, 21.4, 16.1. Eluent (petroleum: isopropanol = 20:1).

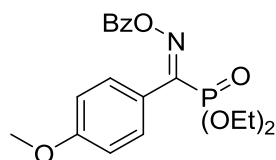

*diethyl(((benzoyloxy)imino)(4-methoxyphenyl)methyl)phosphonate (2j)*:  $^1\text{H}$  NMR (600 MHz,  $\text{CDCl}_3$ )  $\delta$  8.30-7.89 (m, 2H), 7.78-7.73 (m, 2H), 7.63-7.50 (m, 2H), 7.44-7.41 (m, 1H), 7.01-6.94 (m, 2H), 4.34-4.13 (m, 4H), 3.88-3.85 (m, 3H), 1.39-1.27 (m, 6H);  $^{13}\text{C}$  NMR (152 MHz,  $\text{CDCl}_3$ )  $\delta$  163.2, 163.1, 161.8, 161.2, 160.3, 160.1, 159.3, 158.7, 133.7, 133.6, 132.9, 131.0, 130.9, 130.8, 130.1, 129.7, 128.6, 128.2, 124.6, 124.4, 121.3, 121.2, 113.8, 64.4, 63.3, 55.3, 16.2. Eluent (petroleum: isopropanol = 20:1).

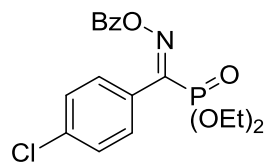

*diethyl(((benzoyloxy)imino)(4-chlorophenyl)methyl)phosphonate (2k)*:  $^1\text{H}$  NMR (600 MHz,  $\text{CDCl}_3$ )  $\delta$  8.29-8.09 (m, 1H), 7.84-7.83 (m, 1H), 7.74-7.73 (m, 1H), 7.65-7.63 (m, 1H), 7.59-7.57 (m, 1H), 7.54-7.41 (m, 4H), 4.35-4.15 (m, 4H), 1.39-1.28 (m, 6H);  $^{13}\text{C}$  NMR (152 MHz,  $\text{CDCl}_3$ )  $\delta$  169.8, 162.9, 162.8, 159.8, 158.9, 158.5, 137.2, 136.7, 133.9, 133.8, 133.3, 131.0, 130.8, 130.6, 130.3, 130.2, 130.0, 129.9, 129.1, 128.8, 128.7, 128.5, 128.3, 127.8, 127.6, 127.5, 64.7, 63.6, 16.2. Eluent (petroleum: isopropanol = 20:1).

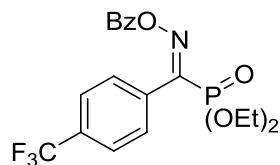

*diethyl (((benzoyloxy)imino)(4-(trifluoromethyl)phenyl)methyl)phosphonate (2l)*:  $^1\text{H}$  NMR (600 MHz,  $\text{CDCl}_3$ )  $\delta$  8.30-7.40 (m, 9H), 4.36-4.17 (m, 4H), 1.40-1.29 (m, 6H);  $^{13}\text{C}$  NMR (152 MHz,  $\text{CDCl}_3$ )  $\delta$  17.0, 162.9, 162.7, 159.9, 158.9, 158.5, 134.0, 133.9, 133.4, 132.9, 132.5, 132.3, 132.1, 130.3, 130.1, 129.7, 129.6, 129.2, 128.9, 128.8, 128.4, 127.7, 125.5, 125.3, 125.2, 124.6, 122.8, 64.8, 64.6, 16.2. Eluent (petroleum: isopropanol = 20:1).

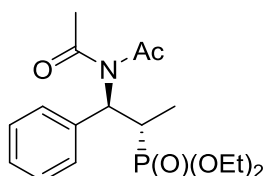

*diethyl (1-(N-acetylacetamido)-1-phenylpropan-2-yl)phosphonate (2ac)*: eluent (petroleum: isopropanol = 20:1), 95.2 mg, yellow liquid, yield: 67%, dr > 50:1.  $^1\text{H}$  NMR (400 MHz,  $\text{CDCl}_3$ )  $\delta$  7.53-7.50 (m, 2H), 7.33-7.27 (m, 3H), 5.32-5.26 (q,  $J = 12.0$  Hz, 1H), 3.98-3.91 (m, 2H), 3.78-3.74 (m, 1H), 3.55-3.48 (m, 2H), 2.41 (s, 6H), 1.28-1.23 (dd,  $J = 20.0$  Hz, 3H), 1.16-1.13 (dd,  $J = 4.0$  Hz, 3H), 1.01-0.98 (t,  $J = 8.0$  Hz, 3H);  $^{13}\text{C}$  NMR (101 MHz,  $\text{CDCl}_3$ )  $\delta$  174.20, 138.10, 129.34, 127.96 ( $J = 2.02$  Hz), 61.75 ( $J = 7.07$  Hz), 61.50 ( $J = 7.07$  Hz), 33.71, 33.23, 26.95, 16.11 (q,  $J = 12.1$  Hz), 12.43 (d,  $J = 5.05$  Hz);  $^{31}\text{P}$  NMR (162 MHz,  $\text{CDCl}_3$ )  $\delta$  31.30. HRMS calcd for  $\text{C}_{17}\text{H}_{26}\text{NO}_5\text{P}$ :  $[\text{M}+\text{H}]^+$  356.1549, found 356.1581.

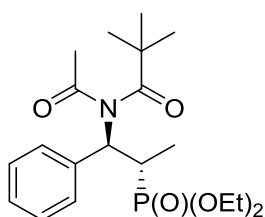

*N-acetyl-N-(2-((diethylperoxy)(oxo)-14-phosphanyl)-1-phenylpropyl)pivalamide (2ad)*: eluent (petroleum: isopropanol = 20:1), 102.0 mg, yellow liquid, yield: 64%, dr = 8.7:1.  $^1\text{H}$  NMR (400 MHz,  $\text{CDCl}_3$ )  $\delta$  7.34-7.28 (m, 5H), 5.16-5.11 (t,  $J = 12.0$  Hz, 1H), 3.98-3.84 (m, 2H), 3.79-3.73 (m, 1H), 3.55-3.37 (m, 2H), 2.42 (s, 3H), 1.41-1.35 (t,  $J = 16.0$  Hz, 3H), 1.14-1.17 (dd,  $J = 4.0$  Hz, 3H), 0.98-0.95 (t,  $J = 8.0$  Hz, 3H), 0.82 (s, 3H);  $^{13}\text{C}$  NMR (101 MHz,  $\text{CDCl}_3$ )  $\delta$  190.87, 173.04, 137.41, 129.48, 128.46, 128.22, 128.04, 127.20, 62.36, 61.73, 61.46, 43.99, 35.70, 34.34, 27.50, 23.61, 16.13 (t,  $J = 14\text{Hz}$ ), 12.41 (d,  $J = 6$  Hz);  $^{31}\text{P}$  NMR (162 MHz,  $\text{CDCl}_3$ )  $\delta$  31.05, 30.62. HRMS calcd for  $\text{C}_{20}\text{H}_{32}\text{NO}_5\text{P}$ :  $[\text{M}+\text{H}]^+$  398.2018, found 398.2064.

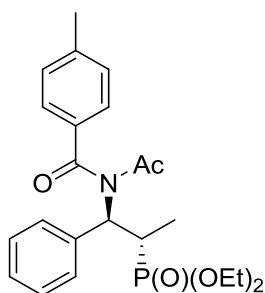

*diethyl (1-(N-acetyl-4-methylbenzamido)-1-phenylpropan-2-yl)phosphonate (2ae)*: eluent (petroleum: isopropanol = 20:1), 51.7 mg, yellow liquid, yield: 30%, dr = 14:1.  $^1\text{H}$  NMR (400 MHz,  $\text{CDCl}_3$ )  $\delta$  7.54-7.52 (d,  $J = 6.0$  Hz, 2H), 7.32-7.20 (m, 5H), 7.15-7.13 (d,  $J = 6.0$  Hz, 2H), 5.95 (m, 1H), 3.90-3.66 (m, 5H), 2.35 (s, 3H), 1.79 (s, 3H), 1.43-1.37 (dd,  $J = 12.0$  Hz, 3H), 1.11-1.03 (td,  $J = 12.0$  Hz, 6H);  $^{13}\text{C}$  NMR (101 MHz,  $\text{CDCl}_3$ )  $\delta$  174.51, 172.73, 144.02, 138.27, 133.84, 129.53, 129.53, 129.31, 128.87, 127.92, 127.89, 61.53 (td,  $J = 17.2$  Hz), 34.74 (d,  $J = 139.4$  Hz), 27.20, 21.53, 16.15 (dd,  $J = 17.2$  Hz), 12.76 (d,  $J = 5.1$  Hz);  $^{31}\text{P}$  NMR (162 MHz,  $\text{CDCl}_3$ )  $\delta$  30.60. HRMS calcd for  $\text{C}_{23}\text{H}_{30}\text{NO}_5\text{P}$ :  $[\text{M}+\text{H}]^+$  432.1832, found 432.1834.

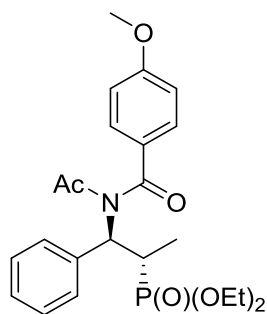

diethyl (1-(N-acetyl-4-methoxybenzamido)-1-phenylpropan-2-yl)phosphonate (**2af**): eluent (petroleum: isopropanol = 20:1), 80.5 mg, yellow liquid, yield: 45%, dr = 14:1.  $^1\text{H}$  NMR (400 MHz,  $\text{CDCl}_3$ )  $\delta$  7.52-7.50 (d,  $J$  = 6.0 Hz, 2H), 7.39-7.37 (d,  $J$  = 6.0 Hz, 2H), 7.24-7.19 (m, 3H), 6.82-6.80 (d,  $J$  = 6.0 Hz, 2H), 5.95 (m, 1H), 3.92-3.48 (m, 8H), 1.81 (s, 3H), 1.44-1.38 (dd,  $J$  = 12.0 Hz, 3H), 1.11-1.03 (td,  $J$  = 12.0 Hz, 6H);  $^{13}\text{C}$  NMR (101 MHz,  $\text{CDCl}_3$ )  $\delta$  173.93, 172.21, 163.49, 138.18, 131.14, 129.19, 128.72, 127.87, 127.83, 114.04, 61.46 (dd,  $J$  = 9.1 Hz), 55.36, 34.81 (d,  $J$  = 38.4 Hz), 16.08 (dd,  $J$  = 16.2 Hz), 12.67 (d,  $J$  = 6.1 Hz);  $^{31}\text{P}$  NMR (162 MHz,  $\text{CDCl}_3$ )  $\delta$  30.64. HRMS calcd for  $\text{C}_{23}\text{H}_{30}\text{NO}_6\text{P}$ :  $[\text{M}+\text{H}]^+$  448.1811, found 448.1814.

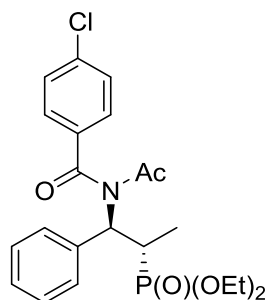

diethyl (1-(N-acetyl-4-chlorobenzamido)-1-phenylpropan-2-yl)phosphonate (**2ag**): eluent (petroleum: isopropanol = 20:1), 117.3 mg, yellow liquid, yield: 68%, dr > 20:1.  $^1\text{H}$  NMR (400 MHz,  $\text{CDCl}_3$ )  $\delta$  7.52-7.50 (m, 2H), 7.36-7.22 (m, 7H), 5.93-5.88 (t,  $J$  = 12.0 Hz, 1H), 3.91-3.80 (m, 3H), 3.69-3.63 (m, 1H), 3.56-3.47 (m, 1H), 1.85 (s, 1H), 1.43-1.37 (dd,  $J$  = 16.0 Hz, 3H), 1.10-1.04 (m, 6H);  $^{13}\text{C}$  NMR (101 MHz,  $\text{CDCl}_3$ )  $\delta$  173.51, 172.39, 139.42, 138.02, 134.84, 129.92, 129.15, 128.04 (t,  $J$  = 4.1 Hz), 61.52, 34.91, 33.07, 27.10, 16.10 (t,  $J$  = 13.1 Hz), 12.73 (d,  $J$  = 8.1 Hz);  $^{31}\text{P}$  NMR (162 MHz,  $\text{CDCl}_3$ )  $\delta$  30.28. HRMS calcd for  $\text{C}_{22}\text{H}_{27}\text{ClNO}_5\text{P}$ :  $[\text{M}+\text{H}]^+$  452.1315, found 432.1429.

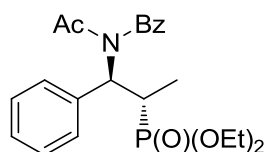

diethyl (1-(N-acetylbenzamido)-1-phenylpropan-2-yl)phosphonate (**3a**): eluent (petroleum: isopropanol = 20:1), 105 mg, yellow liquid, yield: 74%, dr > 20:1.  $^1\text{H}$  NMR (400 MHz,  $\text{CDCl}_3$ )  $\delta$  7.54 (d,  $J$  = 7.0 Hz, 2H), 7.50 (t,  $J$  = 7.3 Hz, 1H), 7.42-7.34 (m, 4H), 7.29-7.21 (m, 3H), 5.95 (t,  $J$  = 7.3 Hz, 1H), 3.96-3.74 (m, 3H), 3.74-3.62 (m, 1H), 3.62-3.46 (m, 1H), 1.79 (s, 3H), 1.41 (dd,  $J$  = 17.2, 7.2 Hz, 3H), 1.09 (t,  $J$  = 7.1 Hz, 3H), 1.05 (t,  $J$  = 7.0 Hz, 3H);  $^{13}\text{C}$  NMR (101 MHz,  $\text{CDCl}_3$ )  $\delta$  174.52, 172.89, 138.17, 136.57, 132.94, 129.28, 128.84, 128.59, 128.00, 127.95, 125.67, 61.43 (t,  $J$  = 7.7 Hz), 33.89 (d,  $J$  = 138.5 Hz), 27.35, 16.15, 16.09, 15.97, 15.90 (dd,  $J$  = 18.1, 12.1 Hz), 12.74 (d,  $J$  = 5.5 Hz);  $^{31}\text{P}$  NMR (162 MHz,  $\text{CDCl}_3$ )  $\delta$  33.35, 30.51. HRMS calcd for  $\text{C}_{22}\text{H}_{28}\text{NNaO}_5\text{P}^+$ :  $[\text{M}+\text{Na}]^+$  440.1597, found 440.1597.



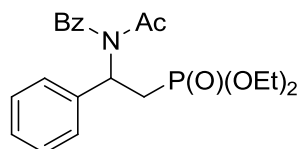

diethyl (2-(*N*-acetylbenzamido)-2-phenylethyl)phosphonate (**3b**): eluent (petroleum: isopropanol = 20:1), 108 mg, yellow liquid, yield: 67%,  $^1\text{H}$  NMR (400 MHz,  $\text{CDCl}_3$ )  $\delta$  7.63 (d,  $J = 7.6$  Hz, 2H), 7.50 (d,  $J = 7.5$  Hz, 3H), 7.38 (t,  $J = 7.6$  Hz, 2H), 7.31 (t,  $J = 7.4$  Hz, 2H), 7.24 (d,  $J = 7.1$  Hz, 1H), 6.14 (td,  $J = 10.4, 4.6$  Hz, 1H), 4.15-3.99 (m, 4H), 3.40 (td,  $J = 16.0, 10.7$  Hz, 1H), 2.66-2.46 (m, 1H), 1.84 (s, 3H), 1.27 (dd,  $J = 12.5, 6.9$  Hz, 6H);  $^{13}\text{C}$  NMR (101 MHz,  $\text{CDCl}_3$ )  $\delta$  173.51, 173.47, 139.08, 138.93, 136.54, 132.22, 128.38, 128.36, 127.97, 127.38, 61.43 (dd,  $J = 37.2$  Hz, 6.5 Hz), 54.24 (d,  $J = 3.1$  Hz), 28.76, 27.80, 27.35, 15.96 (dd,  $J = 5.8$  Hz, 4.2 Hz);  $^{31}\text{P}$  NMR (162 MHz,  $\text{CDCl}_3$ )  $\delta$  27.74. HRMS calcd for  $\text{C}_{21}\text{H}_{26}\text{NNaO}_5\text{P}^+$ :  $[\text{M}+\text{Na}]^+$  426.1441, found 426.1443.

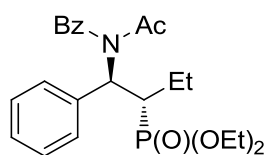

diethyl (1-(*N*-acetylbenzamido)-1-phenylbutan-2-yl)phosphonate (**3c**): eluent (petroleum: isopropanol = 20:1), 98 mg, yellow liquid, yield: 62%, dr = 12:1.  $^1\text{H}$  NMR (400 MHz,  $\text{CDCl}_3$ )  $\delta$  7.60 (d,  $J = 6.8$  Hz, 2H), 7.51 (t,  $J = 7.2$  Hz, 1H), 7.38 (t,  $J = 16.0$  Hz, 2H), 7.38 (dt,  $J = 16.2$  Hz, 2H), 7.31-7.22 (m, 3H), 6.07-5.94 (m, 1H), 3.96-3.72 (m, 3H), 3.66-3.41 (m, 2H), 2.08-1.72 (m, 2H), 1.75 (s, 3H), 1.18 (t,  $J = 7.5$  Hz, 3H), 1.08 (q,  $J = 7.2$  Hz, 6H);  $^{13}\text{C}$  NMR (101 MHz,  $\text{CDCl}_3$ )  $\delta$  174.40, 173.35, 138.48, 136.80, 132.90, 129.47, 128.86, 128.53, 127.92, 127.90, 61.15 (t,  $J = 7.7$  Hz), 59.92, 40.16 (t,  $J = 136.4$  Hz), 27.83, 20.76 (d,  $J = 4.6$  Hz), 16.02 (dd,  $J = 12.9$  Hz, 6.0 Hz), 11.10 (d,  $J = 2.2$  Hz);  $^{31}\text{P}$  NMR (162 MHz,  $\text{CDCl}_3$ )  $\delta$  33.12, 29.82. HRMS calcd for  $\text{C}_{23}\text{H}_{30}\text{NNaO}_5\text{P}^+$ :  $[\text{M}+\text{Na}]^+$  454.1754, found 454.1750.

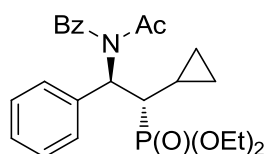

diethyl (1-(*N*-acetylbenzamido)-1-phenylbutan-2-yl)phosphonate (**3d**): eluent (petroleum: isopropanol = 20:1), 110 mg, yellow liquid, yield: 70%, dr >20:1.  $^1\text{H}$  NMR (400 MHz,  $\text{CDCl}_3$ )  $\delta$  7.49 (d,  $J = 7.3$  Hz, 2H), 7.41 (d,  $J = 7.6$  Hz, 2H), 7.33 (t,  $J = 7.1$  Hz, 2H), 7.23 (t,  $J = 7.6$  Hz, 2H), 7.17 (t,  $J = 6.9$  Hz, 1H), 6.23 (t,  $J = 10.9$  Hz, 1H), 4.00-3.84 (m, 2H), 3.84-3.75 (m, 1H), 3.69 (ddd,  $J = 16.8, 9.3, 7.5$  Hz, 1H), 2.81 (dt,  $J = 17.1, 11.3$  Hz, 1H), 1.80 (s, 3H), 1.09 (t,  $J = 7.0$  Hz, 3H), 1.04 (t,  $J = 7.0$  Hz, 3H), 1.00-0.88 (m, 1H), 0.74-0.63 (m, 3H), 0.54-0.50 (m, 1H);  $^{13}\text{C}$  NMR (101 MHz,  $\text{CDCl}_3$ )  $\delta$  174.47, 172.79, 137.71, 136.94, 132.66, 129.70, 128.68, 128.42, 127.62, 127.49, 61.32 (t,  $J = 6.4$  Hz), 60.61 (t,  $J = 8.9$  Hz), 43.46 (d,  $J = 137.3$  Hz), 27.48, 16.00 (dd,  $J = 12.1$  Hz, 6.3 Hz), 9.74 (d,  $J = 5.6$  Hz), 4.97 (d,  $J = 14.6$  Hz), 4.07;  $^{31}\text{P}$  NMR (162 MHz,  $\text{CDCl}_3$ )  $\delta$  30.94, 28.19. HRMS calcd for  $\text{C}_{24}\text{H}_{30}\text{NNaO}_5\text{P}^+$ :  $[\text{M}+\text{Na}]^+$  466.1754, found 466.1753.

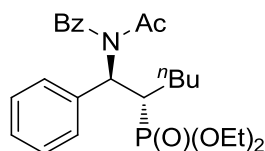

diethyl (1-(*N*-acetylbenzamido)-1-phenylhexan-2-yl)phosphonate (**3e**): eluent (petroleum: isopropanol = 20:1), 129 mg, yellow liquid, yield: 51%, dr = 12:1.  $^1\text{H}$  NMR (400 MHz,  $\text{CDCl}_3$ )  $\delta$  7.59 (d,  $J = 7.0$  Hz, 2H), 7.51 (t,  $J = 7.2$  Hz, 1H), 7.41 (d,  $J = 7.2$  Hz, 2H), 7.36 (d,  $J = 7.2$  Hz, 2H), 7.30-7.21 (m, 3H), 5.98 (t,  $J = 10.9$  Hz, 1H), 3.94-3.83 (m, 1H), 3.83-3.72 (m, 2H), 3.63-3.45 (m, 2H), 1.91-1.67 (m, 2H), 1.76 (s, 3H), 1.60 (dt,  $J = 14.7, 7.4$  Hz, 2H), 1.39-1.26 (m, 2H), 1.07 (td,  $J = 7.0, 1.5$  Hz, 6H), 0.91 (t,  $J = 7.3$  Hz, 3H);  $^{13}\text{C}$  NMR (101 MHz,  $\text{CDCl}_3$ )  $\delta$  174.36, 173.29, 138.47, 136.69, 132.91, 129.44, 128.80, 128.53, 127.88, 127.85, 61.07 (t,  $J = 6.8$  Hz), 60.22, 38.85 (d,  $J = 136.6$  Hz), 28.60 (d,  $J = 1.8$  Hz), 27.76, 27.47 (d,  $J = 4.4$  Hz), 23.17, 16.00 (dd,  $J = 10.5$  Hz, 6.5 Hz), 13.79;  $^{31}\text{P}$  NMR (162 MHz,  $\text{CDCl}_3$ )  $\delta$  33.20, 29.92. HRMS calcd for  $\text{C}_{25}\text{H}_{34}\text{NNaO}_5\text{P}^+$ :  $[\text{M}+\text{Na}]^+$  482.2067, found 482.2066.

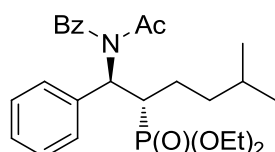

diethyl (1-(*N*-acetylbenzamido)-4-methyl-1-phenylpentan-2-yl)phosphonate (**3f**): eluent (petroleum: isopropanol = 20:1), 94 mg, yellow liquid, yield: 57%, dr = 12:1.  $^1\text{H}$  NMR (400 MHz,  $\text{CDCl}_3$ )  $\delta$  7.54 (d,  $J = 7.2$  Hz, 2H), 7.49 (t,  $J = 7.2$  Hz, 1H), 7.39 (d,  $J = 7.0$  Hz, 2H), 7.37 – 7.31 (m, 2H), 7.25 (t,  $J = 7.3$  Hz, 2H), 7.19 (t,  $J = 7.2$  Hz, 1H), 5.96 (t,  $J = 11.1$  Hz, 1H), 3.94-3.78 (m, 2H), 3.78-3.60 (m, 2H), 3.60-3.44 (m, 1H), 2.19-2.03 (m, 1H), 1.95-1.78 (m, 1H), 1.77 (s, 3H), 1.45-1.27 (m, 1H), 1.13 (t,  $J = 7.1$  Hz, 3H), 1.01 (t,  $J = 7.0$  Hz, 3H), 0.98 (dd,  $J = 13.9, 6.7$  Hz, 6H);  $^{13}\text{C}$  NMR (101 MHz,  $\text{CDCl}_3$ )  $\delta$  174.30, 172.91, 138.33, 136.69, 132.86, 129.45, 128.79, 128.54, 127.79, 127.75, 61.26 (dd,  $J = 11.6$  Hz, 7.0 Hz), 60.89 (d,  $J = 7.0$  Hz), 37.59, 36.70 (d,  $J = 4.2$  Hz), 36.23, 27.52, 26.13 (d,  $J = 2.6$  Hz), 23.87, 21.52, 16.02 (dd,  $J = 21.5, 6.3$  Hz);  $^{31}\text{P}$  NMR (162 MHz,  $\text{CDCl}_3$ )  $\delta$  33.55, 30.05. HRMS calcd for  $\text{C}_{25}\text{H}_{34}\text{NNaO}_5\text{P}^+$ :  $[\text{M}+\text{Na}]^+$  482.2067, found 482.2070.

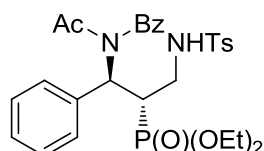

Diethyl (1-(*N*-acetylbenzamido)-3-(4-methylphenylsulfonamido)-1-phenylpropan-2-yl)phosphonate (**3g**): eluent (petroleum: isopropanol = 20:1), 105.5 mg, yellow liquid, yield: 45%, dr = 17:1.  $^1\text{H}$  NMR (400 MHz,  $\text{CDCl}_3$ )  $\delta$  7.78 (d,  $J = 8.1$  Hz, 2H), 7.59 (t,  $J = 6.7$  Hz, 2H), 7.48 (t,  $J = 4.4$  Hz, 1H), 7.36-7.31 (m, 6H), 7.28-7.24 (m, 3H), 6.13 (s, 1H), 5.93 (q,  $J = 6.7$  Hz, 1H), 3.81-3.62 (m, 4H), 3.54-3.45 (m, 2H), 3.36-3.28 (m, 1H), 2.42 (s, 3H), 1.81 (s, 3H), 0.97 (t,  $J = 7.1$  Hz, 3H), 0.94 (t,  $J = 7.0$  Hz, 3H);  $^{13}\text{C}$  NMR (101 MHz,  $\text{CDCl}_3$ )  $\delta$  174.85, 173.62, 143.22, 137.21, 136.66, 136.26, 132.98, 129.55, 129.07, 128.83, 128.50, 128.30, 128.14, 127.20, 62.09 (dd,  $J = 32.0, 7.0$  Hz), 41.78 (d,  $J = 6.7$  Hz), 39.06, 37.70, 27.71, 21.43, 15.85 (dd,  $J = 5.5, 5.2$  Hz);  $^{31}\text{P}$  NMR (162 MHz,  $\text{CDCl}_3$ )  $\delta$  27.98, 26.32. HRMS calcd for  $\text{C}_{29}\text{H}_{35}\text{N}_2\text{NaO}_7\text{PS}^+$ :  $[\text{M}+\text{H}]^+$  609.1795, found 609.1791.

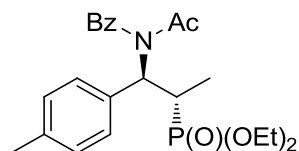

diethyl (1-(*N*-acetylbenzamido)-1-(*p*-tolyl)propan-2-yl)phosphonate (**3h**): eluent (petroleum: isopropanol = 20:1), 122 mg, yellow liquid, yield: 71%, dr = 4:1.  $^1\text{H}$  NMR (400 MHz,  $\text{CDCl}_3$ )  $\delta$  7.48 (t,  $J = 7.3$  Hz, 1H), 7.42 (d,  $J = 8.0$  Hz, 4H), 7.34 (t,  $J = 7.6$  Hz, 2H), 7.06 (d,  $J = 7.9$  Hz, 2H), 5.90 (t,  $J = 11.3$  Hz, 1H), 4.00-3.77 (m, 3H), 3.77-3.63 (m, 1H), 3.63-3.46 (m, 1H), 2.26 (s, 3H), 1.79 (s, 3H), 1.41 (dd,  $J = 17.3, 7.2$  Hz, 1H), 1.11 (t,  $J = 7.0$  Hz, 3H), 1.07 (t,  $J = 7.0$  Hz, 3H);  $^{13}\text{C}$  NMR (101 MHz,  $\text{CDCl}_3$ )  $\delta$  174.47, 172.95, 137.50, 136.66, 135.20, 132.79, 132.69, 129.82, 129.20, 128.77, 128.64, 128.61, 128.54, 128.10, 125.58, 61.62 (d,  $J = 6.2$  Hz), 39.42, 38.06, 33.57 (d,  $J = 136.4$  Hz), 27.24, 20.94, 16.37, 16.32, 16.10 (dd,  $J = 13.2$  Hz, 6.4 Hz), 15.86, 12.74, 12.71 (d,  $J = 5.6$  Hz);  $^{31}\text{P}$  NMR (162 MHz,  $\text{CDCl}_3$ )  $\delta$  33.47, 30.66. HRMS calcd for  $\text{C}_{23}\text{H}_{30}\text{NNaO}_5\text{P}^+$ :  $[\text{M} + \text{Na}]^+$  454.1754, found 454.1750.

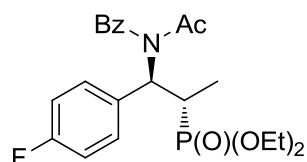

diethyl (1-(*N*-acetylbenzamido)-1-(4-fluorophenyl)propan-2-yl)phosphonate (**3i**): eluent (petroleum: isopropanol = 20:1), 123.5 mg, yellow liquid, yield: 71%, dr = 5:1.  $^1\text{H}$  NMR (400 MHz,  $\text{CDCl}_3$ )  $\delta$  7.53 (m, 3H), 7.37 (m, 4H), 6.96 (t,  $J = 8.7$  Hz, 2H), 5.92 (t,  $J = 10.9$  Hz, 1H), 3.98-3.79 (m, 3H), 3.78-3.68 (m, 1H), 3.59-3.38 (m, 1H), 1.78 (s, 3H), 1.38 (dd,  $J = 17.2, 7.2$  Hz, 3H), 1.11 (q,  $J = 7.0$  Hz, 6H);  $^{13}\text{C}$  NMR (101 MHz,  $\text{CDCl}_3$ )  $\delta$  174.34, 172.98, 163.46, 161.01, 136.49, 134.29, 134.25, 133.06, 131.25, 131.17, 128.93, 128.60, 127.37, 127.29, 114.92, 114.81, 114.70, 114.60, 61.55 (d,  $J = 6.9$  Hz), 38.58 (d,  $J = 136.5$  Hz), 34.16 (d,  $J = 136.5$  Hz), 27.39, 16.37 (t,  $J = 5.4$  Hz), 16.08 (dd,  $J = 16.4$  Hz, 6.4 Hz), 12.71 (t,  $J = 5.7$  Hz);  $^{31}\text{P}$  NMR (162 MHz,  $\text{CDCl}_3$ )  $\delta$  33.00, 30.24;  $^{19}\text{F}$  NMR (376 MHz,  $\text{CDCl}_3$ )  $\delta$  -113.97, -115.74. HRMS calcd for  $\text{C}_{22}\text{H}_{27}\text{FNNaO}_5\text{P}^+$ :  $[\text{M} + \text{Na}]^+$  458.1503, found 458.1502.

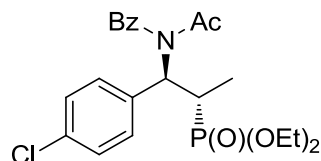

diethyl (1-(*N*-acetylbenzamido)-1-(4-chlorophenyl)propan-2-yl)phosphonate (**3j**): eluent (petroleum: isopropanol = 20:1), 148 mg, yellow liquid, yield: 82%, dr = 7:1.  $^1\text{H}$  NMR (400 MHz,  $\text{CDCl}_3$ )  $\delta$  7.51 (d,  $J = 8.4$  Hz, 3H), 7.44 (d,  $J = 7.9$  Hz, 2H), 7.39 (d,  $J = 7.8$  Hz, 2H), 7.31 (s, 1H), 7.24 (d,  $J = 8.4$  Hz, 2H), 5.90 (t,  $J = 10.9$  Hz, 1H), 3.96-3.81 (m, 3H), 3.81-3.67 (m, 1H), 3.58-3.40 (m, 1H), 1.78 (s, 3H), 1.38 (dd,  $J = 17.7, 7.0$  Hz, 3H), 1.12 (t,  $J = 7.1$  Hz, 3H), 1.10 (t,  $J = 7.1$  Hz, 3H);  $^{13}\text{C}$  NMR (101 MHz,  $\text{CDCl}_3$ )  $\delta$  174.10, 172.92, 136.84, 136.35, 133.59, 132.99, 130.79, 128.87, 128.52, 128.01, 127.93, 127.12, 61.48 (dd,  $J = 7.0$  Hz, 2.7 Hz), 38.44 (d,  $J = 136.8$  Hz), 33.85 (d,  $J = 139.0$  Hz), 27.35, 16.27 (d,  $J = 4.6$  Hz), 15.95 (dd,  $J = 9.9$  Hz, 6.2 Hz), 12.58 (d,  $J = 5.7$  Hz);  $^{31}\text{P}$  NMR (162 MHz,  $\text{CDCl}_3$ )  $\delta$  32.80, 30.00. HRMS calcd for  $\text{C}_{22}\text{H}_{27}\text{ClNNaO}_5\text{P}^+$ :  $[\text{M} + \text{Na}]^+$  474.1208, found 474.1208.

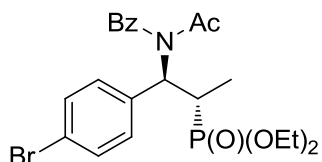

diethyl (1-(*N*-acetylbenzamido)-1-(4-bromophenyl)propan-2-yl)phosphonate (**3k**): eluent (petroleum: isopropanol = 20:1), 142.5 mg, yellow liquid, yield: 72%, dr = 7:1.  $^1\text{H}$  NMR (400 MHz,  $\text{CDCl}_3$ )  $\delta$  7.46 (d,  $J$  = 7.2 Hz, 1H), 7.46-7.37 (m, 8H), 5.87 (t,  $J$  = 11.1 Hz, 1H), 3.96-3.82 (m, 3H), 3.82-3.70 (m, 1H), 3.56-3.40 (m, 1H), 1.77 (s, 3H), 1.37 (dd,  $J$  = 17.2, 7.2 Hz, 3H), 1.12 (t,  $J$  = 7.0 Hz, 3H), 1.09 (t,  $J$  = 7.0 Hz, 3H);  $^{13}\text{C}$  NMR (101 MHz,  $\text{CDCl}_3$ )  $\delta$  174.17, 173.05, 137.39, 136.41, 133.08, 131.21, 131.00, 129.81, 128.95, 128.62, 128.10, 127.54, 121.94, 68.71 (d,  $J$  = 5.5 Hz), 33.88 (d,  $J$  = 139.0 Hz), 27.44, 16.34 (d,  $J$  = 4.9 Hz), 16.02 (dd,  $J$  = 11.0 Hz, 6.3 Hz), 12.63 (d,  $J$  = 5.7 Hz);  $^{31}\text{P}$  NMR (162 MHz,  $\text{CDCl}_3$ )  $\delta$  32.86, 30.06. HRMS calcd for  $\text{C}_{22}\text{H}_{27}\text{BrNNaO}_5\text{P}^+$ :  $[\text{M}+\text{Na}]^+$  518.0702, found 518.0702.

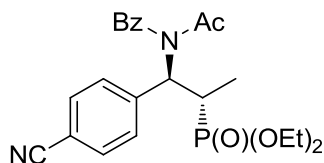

diethyl (1-(*N*-acetylbenzamido)-1-(4-cyanophenyl)propan-2-yl)phosphonate (**3l**): eluent (petroleum: isopropanol = 20:1), 83 mg, yellow liquid, yield: 47%, dr = 2:1.  $^1\text{H}$  NMR (400 MHz,  $\text{CDCl}_3$ )  $\delta$  7.89 (d,  $J$  = 8.3 Hz, 1H), 7.71 (d,  $J$  = 8.3 Hz, 1H), 7.66 (d,  $J$  = 8.4 Hz, 1H), 7.62-7.50 (m, 2 H), 7.45-7.36 (m, 4H), 5.98 (d,  $J$  = 10.9 Hz, 1H), 3.98-3.72 (m, 4H), 3.65-3.42 (m, 1H), 1.77 (s, 3H), 1.38 (dd,  $J$  = 17.2, 7.3 Hz, 3H), 1.22-1.03 (m, 6H);  $^{13}\text{C}$  NMR (101 MHz,  $\text{CDCl}_3$ )  $\delta$  200.38, 174.19, 173.95, 173.10, 143.52, 143.16, 136.35, 136.18, 136.12, 133.39, 133.18, 131.72, 130.30, 129.63, 129.11, 129.00, 128.61, 127.63, 118.58, 111.64, 61.73 (dd,  $J$  = 6.9 Hz, 4.5 Hz), 61.62 (dd,  $J$  = 7.6 Hz, 2.2 Hz), 33.62 (d,  $J$  = 139.1 Hz), 32.92 (d,  $J$  = 139.1 Hz), 31.72, 27.65, 27.52, 16.12 (dd,  $J$  = 11.0 Hz, 5.8 Hz), 16.11 (dd,  $J$  = 15.3 Hz, 5.8 Hz), 12.59 (d,  $J$  = 5.8 Hz), 8.07;  $^{31}\text{P}$  NMR (162 MHz,  $\text{CDCl}_3$ )  $\delta$  32.68, 32.43, 29.91, 29.50. HRMS calcd for  $\text{C}_{23}\text{H}_{27}\text{N}_2\text{NaO}_5\text{P}^+$ :  $[\text{M}+\text{Na}]^+$  465.1550, found 465.1560.

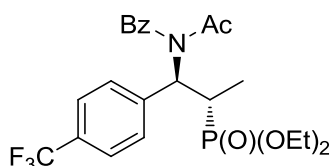

diethyl(1-(*N*-acetylbenzamido)-1-(4-(trifluoromethyl)phenyl)propan-2-yl)phosphonate(**3m**): eluent (petroleum: isopropanol = 20:1), 56 mg, yellow liquid, yield: 29%, dr = 8:1.  $^1\text{H}$  NMR (400 MHz,  $\text{CDCl}_3$ )  $\delta$  7.71 (d,  $J$  = 8.2 Hz, 2H), 7.55-7.50 (m, 3H), 7.46-7.37 (m, 4H), 5.96 (t,  $J$  = 11.1 Hz, 1H), 3.97-3.82 (m, 3H), 3.82-3.70 (m, 1H), 3.62-3.45 (m, 1H), 1.78 (s, 3H), 1.39 (dd,  $J$  = 17.3, 7.2 Hz, 3H), 1.10 (t,  $J$  = 7.1 Hz, 3H), 1.05 (t,  $J$  = 7.1 Hz, 3H);  $^{13}\text{C}$  NMR (101 MHz,  $\text{CDCl}_3$ )  $\delta$  174.14, 173.21, 142.38, 136.38, 133.24, 130.53, 130.21, 129.95, 129.89, 129.57, 129.07, 128.69, 128.15, 127.27, 126.17, 125.33, 125.02, 124.91, 124.87, 124.83, 122.62, 61.70 (dd,  $J$  = 7.0 Hz, 4.5 Hz), 33.77 (d,  $J$  = 139.2 Hz), 27.63, 16.01 (dd,  $J$  = 13.4 Hz, 7.0 Hz), 12.66 (d,  $J$  = 5.7 Hz);  $^{31}\text{P}$

NMR (162 MHz, CDCl<sub>3</sub>) δ 32.74, 29.79; <sup>19</sup>F NMR (376 MHz, CDCl<sub>3</sub>) δ -62.43, -62.69. HRMS calcd for C<sub>23</sub>H<sub>27</sub>F<sub>3</sub>NNaO<sub>3</sub>P<sup>+</sup>: [M+Na]<sup>+</sup> 508.1471, found 508.1469.

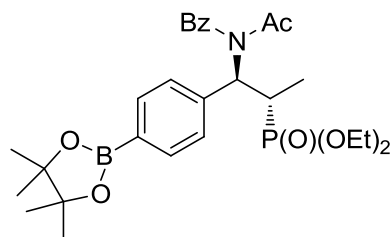

*diethyl (1-(N-acetylbenzamido)-1-(4-(4,4,5,5-tetramethyl-1,3,2-dioxaborolan-2-yl)phenyl)propan-2-yl)phosphonate (3n)*: eluent (petroleum: isopropanol = 20:1), 87 mg, yellow liquid, yield: 40%, dr = 13:1. <sup>1</sup>H NMR (400 MHz, CDCl<sub>3</sub>) δ 7.71 (d, *J* = 8.0 Hz, 2H), 7.54 (d, *J* = 8.0 Hz, 2H), 7.46 (dd, *J* = 3.7, 1.4 Hz, 1H), 7.41 (d, *J* = 7.2 Hz, 2H), 7.36 (d, *J* = 7.4 Hz, 2H), 5.95 (t, *J* = 11.1 Hz, 1H), 3.94-3.81 (m, 2H), 3.81-3.65 (m, 2H), 3.64-3.46 (m, 1H), 1.77 (s, 3H), 1.40 (dd, *J* = 17.3, 7.2 Hz, 3H), 1.31 (s, 12H), 1.11 (t, *J* = 7.1 Hz, 3H), 1.04 (t, *J* = 7.1 Hz, 3H); <sup>13</sup>C NMR (101 MHz, CDCl<sub>3</sub>) δ 174.32, 173.00, 141.17, 136.61, 134.41, 132.88, 132.04, 131.94, 128.87, 128.64, 128.47, 128.35, 83.65, 61.50 (dd, *J* = 7.1 Hz, 3.3 Hz), 33.76 (d, *J* = 138.7 Hz), 27.37, 24.74 (d, *J* = 6.1 Hz), 16.04 (dd, *J* = 15.7 Hz, 6.4 Hz), 12.70 (d, *J* = 5.6 Hz); <sup>31</sup>P NMR (162 MHz, CDCl<sub>3</sub>) δ 33.25, 30.31. HRMS calcd for C<sub>28</sub>H<sub>39</sub>BNNaO<sub>3</sub>P<sup>+</sup>: [M+Na]<sup>+</sup> 566.2449, found 566.2441.

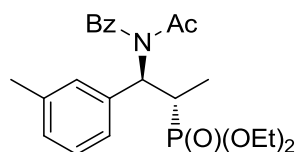

*diethyl (1-(N-acetylbenzamido)-1-(m-tolyl)propan-2-yl)phosphonate (3o)*: eluent (petroleum: isopropanol = 20:1), 108.6 mg, yellow liquid, yield: 63%, dr = 16:1. <sup>1</sup>H NMR (400 MHz, CDCl<sub>3</sub>) δ 7.49 (t, *J* = 7.3 Hz, 1H), 7.42 (d, *J* = 7.3 Hz, 2H), 7.35 (t, *J* = 7.4 Hz, 3H), 7.33 (d, *J* = 6.6 Hz, 1H), 7.13 (t, *J* = 7.9 Hz, 1H), 7.02 (d, *J* = 7.5 Hz, 1H), 5.89 (t, *J* = 11.2 Hz, 1H), 3.95-3.74 (m, 3H), 3.73-3.59 (m, 1H), 3.59-3.45 (m, 1H), 2.29 (s, 3H), 1.79 (s, 3H), 1.40 (dd, *J* = 17.2, 7.2 Hz, 3H), 1.09 (t, *J* = 7.0 Hz, 3H), 1.06 (t, *J* = 7.0 Hz, 3H); <sup>13</sup>C NMR (100 MHz, CDCl<sub>3</sub>) δ 174.50, 172.88, 138.13, 137.30, 136.70, 132.83, 130.06, 128.79, 128.64, 128.61, 127.79, 126.34, 61.40 (t, *J* = 6.5 Hz), 34.01 (d, *J* = 138.7 Hz), 27.27, 21.31, 15.99 (dd, *J* = 14.7 Hz, 5.4 Hz), 12.76 (d, *J* = 5.7 Hz); <sup>31</sup>P NMR (162 MHz, CDCl<sub>3</sub>) δ 33.38, 30.55. HRMS calcd for C<sub>23</sub>H<sub>30</sub>NNaO<sub>3</sub>P<sup>+</sup>: [M+Na]<sup>+</sup> 454.1754, found 454.1752.

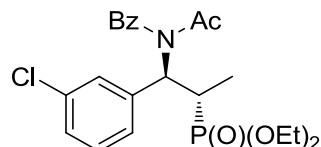

*diethyl (1-(N-acetylbenzamido)-1-(3-chlorophenyl)propan-2-yl)phosphonate (3p)*: eluent (petroleum: isopropanol = 20:1), 127 mg, yellow liquid, yield: 67%, dr = 20:1. <sup>1</sup>H NMR (400 MHz, CDCl<sub>3</sub>) δ 7.59 (s, 1H), 7.53 (t, *J* = 7.3 Hz, 1H), 7.44 (m, *J* = 11.0, 4.4 Hz, 3H), 7.39 (t, *J* = 7.7 Hz, 2H), 7.21 (m, 2H), 5.88 (t, *J* = 11.1 Hz, 1H), 3.97-3.81 (m, 3H), 3.82-3.70 (m, 1H), 3.49 (m, 1H), 1.78 (s, 1H), 1.38 (dd, *J* = 17.3, 7.2 Hz, 3H), 1.13 (t, *J* = 7.1 Hz, 3H), 1.08 (t, *J* = 7.1 Hz, 3H); <sup>13</sup>C NMR (101 MHz, CDCl<sub>3</sub>) δ 174.08, 172.97, 140.31, 136.39, 133.62, 133.06, 129.66, 129.12, 128.93, 128.63, 128.03, 127.67, 61.55 (dd, *J* = 7.1 Hz, 3.4 Hz), 60.88, 34.27 (d, *J* = 139.1

Hz), 27.45, 16.00 (dd,  $J = 13.0$  Hz, 6.4 Hz), 12.61 (d,  $J = 5.7$  Hz);  $^{31}\text{P}$  NMR (162 MHz,  $\text{CDCl}_3$ )  $\delta$  32.74, 29.89. HRMS calcd for  $\text{C}_{22}\text{H}_{27}\text{ClNNaO}_5\text{P}^+$ :  $[\text{M} + \text{Na}]^+$  474.1208, found 474.1208.

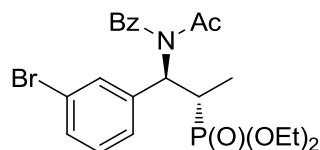

*diethyl (1-(N-acetylbenzamido)-1-(3-bromophenyl)propan-2-yl)phosphonate (3q)*: eluent (petroleum: isopropanol = 20:1), 142 mg, yellow liquid, yield: 72%, dr >20:1.  $^1\text{H}$  NMR (400 MHz,  $\text{CDCl}_3$ )  $\delta$  7.74 (s, 1H), 7.53 (t,  $J = 7.2$  Hz, 1H), 7.48 (dd,  $J = 12.8, 7.6$  Hz, 3H), 7.43-7.35 (m, 3H), 7.14 (t,  $J = 7.9$  Hz, 1H), 5.87 (t,  $J = 11.0$  Hz, 1H), 3.98-3.82 (m, 3H), 3.83-3.69 (m, 1H), 3.58-3.40 (m, 1H), 1.79 (s, 3H), 1.38 (dd,  $J = 17.3, 7.2$  Hz, 3H), 1.13 (t,  $J = 7.1$  Hz, 3H), 1.09 (t,  $J = 7.1$  Hz, 3H);  $^{13}\text{C}$  NMR (101 MHz,  $\text{CDCl}_3$ )  $\delta$  173.96, 172.86, 140.49, 136.27, 133.00, 132.46, 131.91, 131.82, 130.88, 129.35, 128.86, 128.55, 128.36, 128.24, 128.05, 121.70, 61.48 (dd,  $J = 6.9$  Hz, 4.6 Hz), 33.66 (d,  $J = 139.1$  Hz), 27.36, 15.93 (dd,  $J = 11.6$  Hz, 7.0 Hz), 12.51 (d,  $J = 5.7$  Hz);  $^{31}\text{P}$  NMR (162 MHz,  $\text{CDCl}_3$ )  $\delta$  32.66, 29.88. HRMS calcd for  $\text{C}_{22}\text{H}_{27}\text{BrNNaO}_5\text{P}^+$ :  $[\text{M} + \text{Na}]^+$  518.0702, found 518.0702.

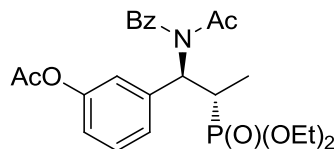

*3-(1-(N-acetylbenzamido)-2-(diethoxyphosphoryl)propyl)phenyl acetate (3r)*: eluent (petroleum: isopropanol = 20:1), 125.5 mg, yellow liquid, yield: 63%, dr = 16:1.  $^1\text{H}$  NMR (400 MHz,  $\text{CDCl}_3$ )  $\delta$  7.50 (d,  $J = 7.3$  Hz, 1H), 7.44 (d,  $J = 7.3$  Hz, 2H), 7.42-7.34 (m, 3H), 7.34-7.31 (m, 1H), 7.26 (t,  $J = 7.9$  Hz, 1H), 7.02-6.94 (m, 1H), 5.99-5.83 (m, 1H), 3.96-3.79 (m, 3H), 3.79-3.66 (m, 1H), 3.57-3.42 (m, 1H), 2.26 (s, 3H), 1.78 (s, 3H), 1.39 (dd,  $J = 17.2, 7.1$  Hz, 3H), 1.12 (t,  $J = 7.1$  Hz, 3H), 1.07 (t,  $J = 7.1$  Hz, 3H);  $^{13}\text{C}$  NMR (101 MHz,  $\text{CDCl}_3$ )  $\delta$  174.36, 172.92, 169.05, 150.33, 139.96, 136.45, 132.97, 128.89, 128.67, 128.65, 126.71, 122.71, 121.23, 61.57 (dd,  $J = 6.5$  Hz, 6.0 Hz), 33.39 (d,  $J = 139.0$  Hz), 27.34, 20.97, 16.00 (dd,  $J = 16.4$  Hz, 6.4 Hz), 12.61 (d,  $J = 5.6$  Hz);  $^{31}\text{P}$  NMR (162 MHz,  $\text{CDCl}_3$ )  $\delta$  33.00, 30.16. HRMS calcd for  $\text{C}_{24}\text{H}_{30}\text{NNaO}_7\text{P}^+$ :  $[\text{M} + \text{Na}]^+$  498.1652, found 498.1651.

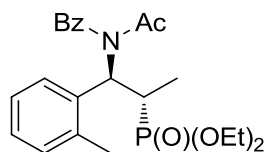

*diethyl (1-(N-acetylbenzamido)-1-(o-tolyl)propan-2-yl)phosphonate (3s)*: eluent (petroleum: isopropanol = 20:1), 108.6 mg, yellow liquid, yield: 63%, dr = 5:1.  $^1\text{H}$  NMR (400 MHz,  $\text{CDCl}_3$ )  $\delta$  7.52 (d,  $J = 7.6$  Hz, 1H), 7.49-7.43 (m, 1H), 7.32 (dt,  $J = 15.3, 7.6$  Hz, 4H), 7.13 (d,  $J = 6.9$  Hz, 1H), 7.06 (td,  $J = 7.4, 1.0$  Hz, 1H), 7.00 (t,  $J = 7.3$  Hz, 1H), 6.37 (t,  $J = 11.1$  Hz, 1H), 3.91-3.79 (m, 3H), 3.79-3.61 (m, 1H), 3.60-3.40 (m, 1H), 2.55 (s, 3H), 1.77 (s, 3H), 1.44 (dd,  $J = 17.2, 7.2$  Hz, 1H), 1.12 (t,  $J = 7.1$  Hz, 3H), 1.02 (t,  $J = 7.1$  Hz, 3H);  $^{13}\text{C}$  NMR (101 MHz,  $\text{CDCl}_3$ )  $\delta$  175.19, 171.43, 136.97, 136.63, 135.96, 133.24, 133.13, 130.20, 130.16, 129.03, 128.76, 128.66, 127.70, 126.87, 126.25, 125.45, 125.23, 67.26 ( $J = 3.6$  Hz), 61.99 (dd,  $J = 46.1$  Hz, 7.2 Hz), 61.30 (dd,  $J = 13.5$  Hz, 6.9 Hz), 35.85 (d,  $J = 35.9$  Hz), 30.90 (d,  $J = 138.0$  Hz), 26.57, 20.01, 16.31 (dd,  $J = 8.7$  Hz, 5.7 Hz), 15.94 (dd,  $J = 23.1$  Hz, 5.8 Hz), 12.48 (d,  $J = 5.4$  Hz);  $^{31}\text{P}$  NMR (162 MHz,  $\text{CDCl}_3$ )  $\delta$  33.69, 30.72. HRMS calcd for  $\text{C}_{23}\text{H}_{30}\text{NNaO}_5\text{P}^+$ :  $[\text{M} + \text{Na}]^+$  454.1754, found 454.1751.

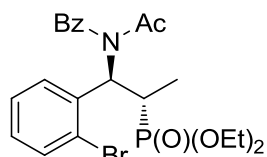

diethyl (1-(*N*-acetylbenzamido)-1-(2-bromophenyl)propan-2-yl)phosphonate (**3t**): eluent (petroleum: isopropanol = 20:1), 116 mg, yellow liquid, yield: 56%, dr >20:1.  $^1\text{H}$  NMR (400 MHz,  $\text{CDCl}_3$ )  $\delta$  8.11 (d,  $J = 5.8$  Hz, 0.47H), 7.97 (d,  $J = 5.8$  Hz, 0.13H), 7.94 (d,  $J = 5.8$  Hz, 0.33H), 7.59-7.42 (m, 4H), 7.42-7.03 (m, 4H), 6.42 (t,  $J = 11.2$  Hz, 0.53H), 5.86-5.73 (m, 0.14H), 5.74-5.63 (m, 0.27H), 4.29-3.76 (m, 4H), 3.62-3.43 (m, 0.55H), 2.82-2.56 (m, 0.41H), 2.06 (s, 0.47H), 2.06 (s, 0.80H), 2.06 (s, 1.60H), 1.44 (dd,  $J = 17.3, 7.3$  Hz, 1.59H), 1.39 (t,  $J = 7.1$  Hz, 1H), 1.31 (t,  $J = 7.1$  Hz, 1.72H), 1.25 (t,  $J = 7.1$  Hz, 1.80H), 1.14 (dd,  $J = 17.7, 7.5$  Hz, 0.54H), 1.07 (dd,  $J = 18.1, 7.6$  Hz, 0.84H), 1.02 (t,  $J = 7.1$  Hz, 1.71H);  $^{13}\text{C}$  NMR (101 MHz,  $\text{CDCl}_3$ )  $\delta$  174.85, 170.58, 136.43, 136.20, 133.15, 132.60, 131.96, 129.23, 128.85, 128.71, 126.32, 125.19, 61.48 (dd,  $J = 33.1$  Hz, 6.9 Hz), 58.87, 34.10 (d,  $J = 137.6$  Hz), 26.19, 15.98 (dd,  $J = 34.0$  Hz, 5.8 Hz), 12.11 (d,  $J = 5.6$  Hz);  $^{31}\text{P}$  NMR (162 MHz,  $\text{CDCl}_3$ )  $\delta$  30.56, 29.66. HRMS calcd for  $\text{C}_{22}\text{H}_{27}\text{BrNNaO}_5\text{P}^+$ :  $[\text{M}+\text{Na}]^+$  518.0702, found 518.0702.

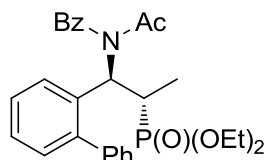

diethyl (1-([1,1'-biphenyl]-2-yl)-1-(*N*-acetylbenzamido)propan-2-yl)phosphonate (**3u**): eluent (petroleum: isopropanol = 20:1), 134 mg, yellow liquid, yield: 65%, dr >21:1.  $^1\text{H}$  NMR (400 MHz,  $\text{CDCl}_3$ )  $\delta$  7.67 (d,  $J = 7.1$  Hz, 1H), 7.66-7.39 (m, 6H), 7.36-7.27 (m, 4H), 7.24-7.15 (m, 3H), 6.10 (t,  $J = 11.5$  Hz, 1H), 4.09-3.89 (m, 2H), 3.89-3.71 (m, 2H), 3.71-3.53 (m, 1H), 1.44 (s, 3H), 1.37 (dd,  $J = 17.2, 7.2$  Hz, 3H), 1.14 (t,  $J = 7.1$  Hz, 3H), 1.06 (t,  $J = 7.1$  Hz, 3H);  $^{13}\text{C}$  NMR (101 MHz,  $\text{CDCl}_3$ )  $\delta$  175.05, 171.79, 142.60, 141.03, 136.22, 134.53, 132.62, 130.28, 129.58, 129.43, 128.45, 128.34, 127.70, 127.33, 126.63, 61.46 (dd,  $J = 15.2$  Hz, 7.0 Hz), 56.51 (d,  $J = 6.7$  Hz), 34.47, (d,  $J = 136.1$  Hz), 24.25, 16.00 (dd,  $J = 17.3$  Hz, 6.1 Hz), 12.18 (d,  $J = 5.5$  Hz);  $^{31}\text{P}$  NMR (162 MHz,  $\text{CDCl}_3$ )  $\delta$  33.28, 30.98. HRMS calcd for  $\text{C}_{28}\text{H}_{32}\text{NNaO}_5\text{P}^+$ :  $[\text{M}+\text{Na}]^+$  516.1907, found 516.1910.

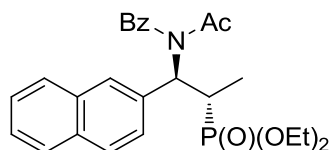

diethyl (1-(*N*-acetylbenzamido)-1-(naphthalen-2-yl)propan-2-yl)phosphonate (**3v**): eluent (petroleum: isopropanol = 20:1), 97 mg, yellow liquid, yield: 47%, dr = 9:1.  $^1\text{H}$  NMR (400 MHz,  $\text{CDCl}_3$ )  $\delta$  8.00 (s, 1H), 7.81 (dd,  $J = 6.4, 2.9$  Hz, 1H), 7.79-7.68 (m, 3H), 7.44 (ddd,  $J = 6.6, 5.0, 2.8$  Hz, 6H), 7.31 (t,  $J = 7.7$  Hz, 2H), 6.11 (t,  $J = 11.2$  Hz, 1H), 3.89-3.74 (m, 3H), 3.74-3.53 (m, 2H), 1.78 (s, 3H), 1.45 (dd,  $J = 17.3, 7.2$  Hz, 3H), 0.97 (t,  $J = 7.1$  Hz, 6H), 0.94 (t,  $J = 7.1$  Hz, 6H);  $^{13}\text{C}$  NMR (101 MHz,  $\text{CDCl}_3$ )  $\delta$  174.42, 173.18, 136.63, 135.73, 132.92, 132.90, 132.86, 128.86, 128.76, 128.66, 128.24, 127.52, 127.32, 127.24, 126.00, 125.80, 61.50 (d,  $J = 6.9$  Hz), 33.88 (d,  $J = 139.0$  Hz), 27.47, 15.94 (d,  $J = 11.5$  Hz, 6.9 Hz), 12.82 (d,  $J = 5.6$  Hz);  $^{31}\text{P}$  NMR (162 MHz,  $\text{CDCl}_3$ )  $\delta$  33.34, 30.44. HRMS calcd for  $\text{C}_{26}\text{H}_{30}\text{NNaO}_5\text{P}^+$ :  $[\text{M}+\text{Na}]^+$  490.1754, found 490.1752.

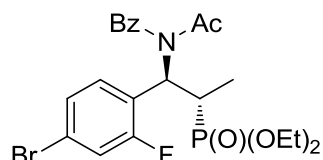

diethyl(1-(*N*-acetylbenzamido)-1-(4-bromo-2-fluorophenyl)propan-2-yl)phosphonate (**3w**): eluent (petroleum: isopropanol = 20:1), 122 mg, yellow liquid, yield: 57%, dr = 15:1.  $^1\text{H}$  NMR (400 MHz,  $\text{CDCl}_3$ )  $\delta$  7.63 (t,  $J = 8.0$  Hz, 1H), 7.53 (t,  $J = 7.3$  Hz, 1H), 7.48 (d,  $J = 7.2$  Hz, 1H), 7.39 (t,  $J = 7.7$  Hz, 1H), 7.21 (dd,  $J = 13.6, 5.0$  Hz, 1H), 6.17 (t,  $J = 11.3$  Hz, 1H), 4.10-3.85 (m, 1H), 3.58-3.38 (m, 1H), 1.87 (s, 1H), 1.38 (dd,  $J = 17.1, 7.2$  Hz, 1H), 1.23 (t,  $J = 7.1$  Hz, 1H), 1.11 (t,  $J = 7.1$  Hz, 1H);  $^{13}\text{C}$  NMR (101 MHz,  $\text{CDCl}_3$ )  $\delta$  174.20, 172.08, 161.50, 159.00, 136.07, 133.12, 132.56, 132.52, 128.90, 128.56, 126.61, 126.58, 124.38, 124.25, 122.06, 121.97, 118.59, 118.33, 61.74 (dd,  $J = 11.2\text{Hz}, 7.1\text{Hz}$ ), 52.87, 32.93 (d,  $J = 140.0\text{Hz}$ ), 26.66, 16.05 (dd,  $J = 20.0\text{Hz}, 6.2\text{Hz}$ ), 12.25 (d,  $J = 5.8\text{Hz}$ );  $^{31}\text{P}$  NMR (162 MHz,  $\text{CDCl}_3$ )  $\delta$  30.38, 29.40;  $^{19}\text{F}$  NMR (376 MHz,  $\text{CDCl}_3$ )  $\delta$  -112.59, -113.30. HRMS calcd for  $\text{C}_{22}\text{H}_{26}\text{BrFNNaO}_5\text{P}^+$ :  $[\text{M}+\text{Na}]^+$  536.0608, found 536.0607.

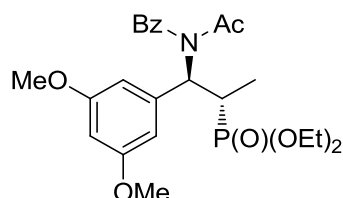

diethyl(1-(*N*-acetylbenzamido)-1-(3,5-dimethoxyphenyl)propan-2-yl)phosphonate (**3x**): eluent (petroleum: isopropanol = 20:1), 146 mg, yellow liquid, yield: 73%, dr > 20:1.  $^1\text{H}$  NMR (400 MHz,  $\text{CDCl}_3$ )  $\delta$  7.51 (t,  $J = 7.3$  Hz, 1H), 7.46 (d,  $J = 7.2$  Hz, 2H), 7.37 (t,  $J = 7.7$  Hz, 2H), 6.70 (d,  $J = 2.2$  Hz, 2H), 6.33 (t,  $J = 2.2$  Hz, 1H), 5.83 (t,  $J = 11.1$  Hz, 1H), 3.94-3.82 (m, 3H), 3.82-3.75 (m, 1H), 3.73 (s, 6H), 3.55-3.39 (m, 1H), 1.80 (s, 3H), 1.39 (dd,  $J = 17.2, 7.2$  Hz, 3H), 1.13 (t,  $J = 7.1$  Hz, 3H), 1.09 (t,  $J = 7.1$  Hz, 3H);  $^{13}\text{C}$  NMR (101 MHz,  $\text{CDCl}_3$ )  $\delta$  174.54, 172.83, 160.25, 140.48, 136.69, 132.92, 128.85, 128.74, 107.53, 100.19, 61.50 (dd,  $J = 7.1$  Hz, 3.4 Hz), 55.25, 34.21 (d,  $J = 138.8$  Hz), 27.27, 16.06 (dd,  $J = 15.4$  Hz, 6.5 Hz), 12.78 (d,  $J = 5.6$  Hz);  $^{31}\text{P}$  NMR (162 MHz,  $\text{CDCl}_3$ )  $\delta$  33.23, 30.34. HRMS calcd for  $\text{C}_{24}\text{H}_{32}\text{NNaO}_7\text{P}^+$ :  $[\text{M}+\text{Na}]^+$  500.1809, found 500.1805.

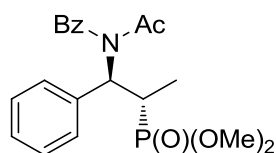

dimethyl (1-(*N*-acetylbenzamido)-1-phenylpropan-2-yl)phosphonate (**3y**): eluent (petroleum: isopropanol = 20:1), 128.5 mg, yellow liquid, yield: 78%, dr > 20:1.  $^1\text{H}$  NMR (400 MHz,  $\text{CDCl}_3$ )  $\delta$  7.56 (d,  $J = 7.1$  Hz, 2H), 7.50 (t,  $J = 7.2$  Hz, 1H), 7.42 (d,  $J = 7.1$  Hz, 2H), 7.35 (t,  $J = 7.7$  Hz, 2H), 7.29 (t,  $J = 7.2$  Hz, 2H), 7.23 (t,  $J = 7.2$  Hz, 1H), 5.94 (dd,  $J = 14.2, 8.1$  Hz, 1H), 5.94 (dd,  $J = 14.2, 8.1$  Hz, 1H), 3.68-3.51 (m, 1H), 3.68-3.51 (m, 1H), 3.47 (d,  $J = 10.7$  Hz, 3H), 3.47 (d,  $J = 10.7$  Hz, 3H), 3.35 (d,  $J = 10.7$  Hz, 3H), 3.35 (d,  $J = 10.7$  Hz, 3H), 1.77 (d,  $J = 8.0$  Hz, 3H), 1.46-1.37 (m, 3H);  $^{13}\text{C}$  NMR (101 MHz,  $\text{CDCl}_3$ )  $\delta$  174.45, 172.80, 137.96, 136.48, 132.96, 129.19, 128.82, 128.57, 128.04, 128.00, 52.14 (t,  $J = 7.2\text{Hz}$ ), 33.76 (d,  $J = 138.7$  Hz), 27.29, 12.71 (d,  $J = 5.8\text{Hz}$ );  $^{31}\text{P}$  NMR (162 MHz,  $\text{CDCl}_3$ )  $\delta$  33.94, 33.15. HRMS calcd for  $\text{C}_{20}\text{H}_{24}\text{NNaO}_5\text{P}^+$ :  $[\text{M}+\text{Na}]^+$  412.1284, found 412.1281.



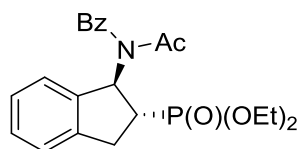

diethyl (1-(*N*-acetylbenzamido)-2,3-dihydro-1*H*-inden-2-yl)phosphonate (**3z**): eluent (petroleum: isopropanol = 20:1), 95 mg, yellow liquid, yield: 57%, dr > 20:1.  $^1\text{H}$  NMR (400 MHz,  $\text{CDCl}_3$ )  $\delta$  7.78 (d,  $J = 7.8$  Hz, 2H), 7.56 (t,  $J = 7.1$  Hz, 1H), 7.46 (t,  $J = 7.5$  Hz, 2H), 7.21 (d,  $J = 10.9$  Hz, 4H), 6.21 (dd,  $J = 17.1, 8.3$  Hz, 1H), 4.16-4.00 (m, 4H), 3.55 (td,  $J = 17.7, 9.0$  Hz, 1H), 3.42 (ddd,  $J = 15.9, 9.5, 6.1$  Hz, 1H), 3.17 (td,  $J = 16.7, 8.6$  Hz, 1H), 2.05 (s, 3H), 1.24 (t,  $J = 7.0$  Hz, 3H), 1.20 (t,  $J = 7.0$  Hz, 3H);  $^{13}\text{C}$  NMR (101 MHz,  $\text{CDCl}_3$ )  $\delta$  174.15, 173.53, 140.58, 140.47, 140.36, 140.23, 136.18, 132.62, 128.79, 127.94, 126.95, 124.78, 121.94, 63.29, 61.94 (dd,  $J = 30.2$  Hz, 6.6 Hz), 39.66 (d,  $J = 148.7$  Hz), 32.00, 27.52, 16.31 (t,  $J = 7.1$  Hz);  $^{31}\text{P}$  NMR (162 MHz,  $\text{CDCl}_3$ )  $\delta$  30.86, 27.39. HRMS calcd for  $\text{C}_{22}\text{H}_{26}\text{NNaO}_5\text{P}^+$ :  $[\text{M}+\text{Na}]^+$  438.1441, found 438.1441.

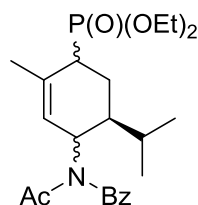

Diethyl ((4*S*,5*S*)-4-(*N*-acetylbenzamido)-5-isopropyl-2-methylcyclohex-2-en-1-yl)phosphonate (**3aa**): eluent (petroleum: isopropanol = 20:1), 88.7 mg, yellow liquid, yield: 51%, dr = 5:1.  $^1\text{H}$  NMR (400 MHz,  $\text{CDCl}_3$ )  $\delta$  7.70 (d,  $J = 7.2$  Hz, 2H), 7.59 (t,  $J = 7.4$  Hz, 1H), 7.48 (t,  $J = 7.6$  Hz, 2H), 5.49 (s, 1H), 5.38 (s, 1H), 4.14-4.07 (m, 4H), 2.64 (dd,  $J = 27.1, 6.1$  Hz, 1H), 2.38-2.17 (m, 1H), 2.11-1.97 (m, 2H), 1.87 (s, 6H), 1.68 (td,  $J = 13.3, 6.7$  Hz, 1H), 1.32 (td,  $J = 7.1, 3.3$  Hz, 6H), 0.94 (d,  $J = 6.7$  Hz, 6H);  $^{13}\text{C}$  NMR (101 MHz,  $\text{CDCl}_3$ )  $\delta$  174.84, 173.95, 136.91, 133.85 (d,  $J = 9.1$  Hz), 133.02, 129.01, 128.94, 124.13 (d,  $J = 12.9$  Hz), 62.12 (d,  $J = 7.0$  Hz), 61.29 (d,  $J = 7.2$  Hz), 40.63, 39.28 (d,  $J = 134.1$  Hz), 28.29, 27.97, 23.89, 22.75, 21.02, 19.75, 16.49 (dd,  $J = 9.8, 5.8$  Hz);  $^{31}\text{P}$  NMR (162 MHz,  $\text{CDCl}_3$ )  $\delta$  29.64, 28.60. HRMS calcd for  $\text{C}_{23}\text{H}_{34}\text{NNaO}_5\text{P}^+$ :  $[\text{M}+\text{Na}]^+$  458.2067, found 458.2061.

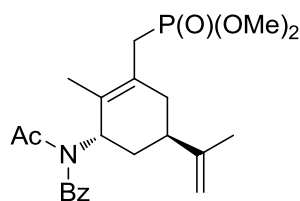

Dimethyl (((3*S*,5*R*)-3-(*N*-acetylbenzamido)-2-methyl-5-(prop-1-en-2-yl)cyclohex-1-en-1-yl)methyl)phosphonate (**3ab**): eluent (petroleum: isopropanol = 20:1), 92 mg, yellow liquid, yield: 55%, dr > 20:1.  $^1\text{H}$  NMR (400 MHz,  $\text{CDCl}_3$ )  $\delta$  7.71 (t,  $J = 7.6$  Hz, 2H), 7.58 (t,  $J = 7.4$  Hz, 1H), 7.47 (t,  $J = 7.6$  Hz, 2H), 5.00 (s, 1H), 4.72 (d,  $J = 20.9$  Hz, 2H), 3.74 (dd,  $J = 10.8, 4.9$  Hz, 6H), 2.81-2.52 (m, 3H), 2.39 (d,  $J = 17.7$  Hz, 1H), 2.23-2.07 (m, 2H), 1.93 (s, 3H), 1.91-1.83 (m, 1H), 1.72 (s, 3H), 1.69-1.64 (m, 3H).  $^{13}\text{C}$  NMR (101 MHz,  $\text{CDCl}_3$ )  $\delta$  173.69, 172.82, 147.42, 136.42, 132.85, 128.89, 128.84, 128.52 (d,  $J = 12.9$  Hz), 124.50 (d,  $J = 11.8$  Hz), 109.50, 57.24 (d,  $J = 2.7$  Hz), 52.46 (dd,  $J = 6.7, 4.7$  Hz), 37.04, 35.33, 32.44, 31.21 (d,  $J = 138.3$  Hz), 27.22, 21.24, 16.56 (d,  $J = 3.0$  Hz).  $^{31}\text{P}$  NMR (162 MHz,  $\text{CDCl}_3$ )  $\delta$  29.91. HRMS calcd for  $\text{C}_{22}\text{H}_{30}\text{NNaO}_5\text{P}^+$ :  $[\text{M}+\text{Na}]^+$  442.1754, found 442.1757.

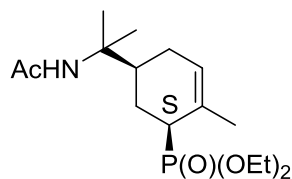

diethyl ((5*S*)-5-(2-acetamidopropan-2-yl)-2-methylcyclohex-2-en-1-yl)phosphonate (**3ac**): eluent (petroleum: isopropanol = 20:1), 106 mg, yellow liquid, yield: 51%. <sup>1</sup>H NMR (400 MHz, CDCl<sub>3</sub>) δ 5.74 (s, 1H), 5.60 (s, 1H), 4.12 (p, *J* = 7.2 Hz, 4H), 2.70-2.50 (m, 1H), 2.24 (ddd, *J* = 24.2, 11.2, 6.7 Hz, 2H), 2.09 (d, *J* = 4.0 Hz, 1H), 1.94 (s, 3H), 1.84 (s, 3H), 1.36 (s, 1H), 1.36-1.27 (m, 13H). <sup>13</sup>C NMR (101 MHz, CDCl<sub>3</sub>) δ 169.78, 128.69, 128.60, 125.53, 125.41, 63.80, 61.95, 61.88, 61.75, 61.68, 55.85, 40.38, 39.04, 38.59, 26.20, 26.17, 25.41, 25.37, 24.42, 23.93, 23.34, 21.94, 16.42, 16.36, 16.32. <sup>31</sup>P NMR (162 MHz, CDCl<sub>3</sub>) δ 30.12. HRMS calcd for C<sub>16</sub>H<sub>30</sub>NNaO<sub>4</sub>P<sup>+</sup>: [M+Na]<sup>+</sup> 354.1805, found 354.1807.

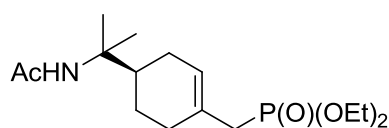

(*R*)-diethyl ((4-(2-acetamidopropan-2-yl)cyclohex-1-en-1-yl)methyl)phosphonate (**3ad**): eluent (petroleum: isopropanol = 20:1), 106 mg, yellow liquid, yield: 60%. <sup>1</sup>H NMR (400 MHz, CDCl<sub>3</sub>) δ 5.59 (s, 1H), 5.51 (s, 1H), 4.09 (dq, *J* = 14.2, 7.1 Hz, 4H), 2.50 (dd, *J* = 21.5, 2.7 Hz, 2H), 2.27-2.12 (m, 3H), 2.12-1.99 (m, 1H), 1.93 (s, 3H), 1.89-1.72 (m, 2H), 1.38-1.18 (m, 13H). <sup>13</sup>C NMR (101 MHz, CDCl<sub>3</sub>) δ 169.40, 128.18, 128.07, 125.84, 125.72, 63.80, 61.74, 61.67, 61.60, 56.03, 40.09, 35.17, 33.80, 30.32, 30.29, 26.71, 26.68, 24.38, 24.02, 23.93, 23.71, 16.37, 16.31. <sup>31</sup>P NMR (162 MHz, CDCl<sub>3</sub>) δ 27.91. HRMS calcd for C<sub>16</sub>H<sub>30</sub>NNaO<sub>4</sub>P<sup>+</sup>: [M+Na]<sup>+</sup> 354.1805, found 354.1803.

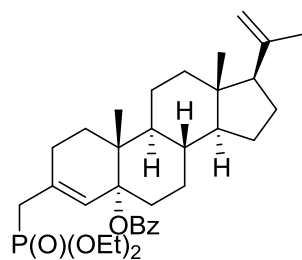

(5*R*,8*S*,9*S*,10*R*,13*S*,14*S*,17*R*)-3-((diethoxyphosphoryl)methyl)-10,13-dimethyl-17-(prop-1-en-2-yl)-2,5,6,7,8,9,10,11,12,13,14,15,16,17-tetradecahydro-1*H*-cyclopenta[*a*]phenanthren-5-yl benzoate (**3af**): eluent (petroleum: isopropanol = 20:1), 106 mg, yellow liquid, yield: 47%. <sup>1</sup>H NMR (400 MHz, CDCl<sub>3</sub>) δ 8.10 (d, *J* = 7.1 Hz, 2H), 7.57 (t, *J* = 7.4 Hz, 1H), 7.45 (t, *J* = 7.6 Hz, 2H), 5.46 (d, *J* = 5.1 Hz, 1H), 4.84 (s, 1H), 4.69 (s, 1H), 4.11-4.19 (m, 4H), 2.58 (dd, *J* = 22.1, 4.7 Hz, 2H), 2.14-1.94 (m, 3H), 1.85-1.80 (m, 1H), 1.77-1.73 (m, 2H), 1.73 (s, 3H), 1.69-1.47 (m, 6H), 1.45-1.40 (m, 2H), 1.34 (t, *J* = 7.0 Hz, 6H), 1.29 (dd, *J* = 11.0, 3.0 Hz, 1H), 1.21-1.13 (m, 2H), 1.09-1.00 (m, 2H), 0.96 (s, 3H), 0.89-0.78 (m, 1H), 0.55 (s, 3H); <sup>13</sup>C NMR (101 MHz, CDCl<sub>3</sub>) δ 169.59, 145.50, 133.15 (d, *J* = 12.3 Hz), 132.97, 132.19 (d, *J* = 11.0 Hz), 130.20, 129.92, 128.22, 110.64, 72.32 (d, *J* = 2.1 Hz), 62.07 (dd, *J* = 8.5, 6.9 Hz), 56.63 (d, *J* = 123.3 Hz), 43.29, 43.16, 38.79, 38.49, 35.22, 35.20, 35.08, 33.83, 28.68, 28.04, 26.67 (d, *J* = 2.6 Hz), 25.32, 24.51, 24.06, 22.47, 16.43 (d, *J* = 6.0 Hz), 16.07, 12.67; <sup>31</sup>P NMR (162 MHz, CDCl<sub>3</sub>) δ 27.69. HRMS calcd for

$C_{34}H_{49}NaO_5P^+$ :  $[M+Na]^+$  591.3210, found 591.3213.

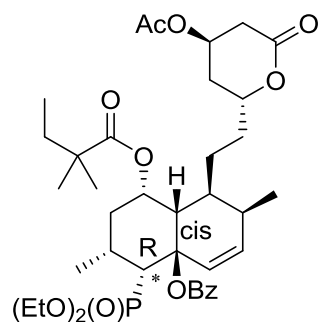

(1*S*,2*S*,3*R*,4*R*,4*aR*,5*S*,7*R*)-4-(2-((2*R*,4*R*)-4-acetoxy-6-oxotetrahydro-2*H*-pyran-2-yl)ethyl)-2-(diethoxyphosphoryl)-5-((2,2-dimethylbutanoyl)oxy)-3,7-dimethyl-1,2,3,4,4*a*,5,6,7-octahydronaphthalen-1-yl benzoate (**3ag**): eluent (petroleum: isopropanol = 20:1), 146 mg, yellow liquid, yield: 51%. <sup>1</sup>H NMR (400 MHz, CDCl<sub>3</sub>) δ 7.74 (d, *J* = 7.5 Hz, 2H), 7.60 (t, *J* = 7.4 Hz, 1H), 7.48 (t, *J* = 7.6 Hz, 2H), 5.67 (s, 1H), 5.24 (s, 1H), 5.15 (s, 1H), 4.49 (s, 1H), 4.14-4.02 (m, 4H), 3.71 (s, 2H), 2.80-2.66 (m, 4H), 2.50 (d, *J* = 23.4 Hz, 1H), 2.37-2.33 (m, 4H), 2.12-2.03 (m, 1H), 2.08 (s, 3H), 1.96 (s, 2H), 1.77-1.65 (m, 4H), 1.59-1.53 (m, 3H), 1.31 (dd, *J* = 14.6, 7.2 Hz, 6H), 1.16-1.13 (m, 8H), 0.94 (d, *J* = 6.9 Hz, 3H), 0.78 (d, *J* = 7.4 Hz, 3H); <sup>13</sup>C NMR (101 MHz, CDCl<sub>3</sub>) δ 177.93, 169.95, 168.85, 132.95, 129.86, 128.95, 128.27, 78.34, 77.32, 77.21, 77.01, 76.69, 76.38, 66.12, 65.51, 64.95, 62.50, 62.43, 61.73, 61.66, 60.47, 49.20, 47.86, 42.78, 41.37, 40.10, 35.30, 32.94, 32.88, 31.36, 30.25, 29.61, 29.39, 27.76, 24.68, 24.29, 22.92, 22.49, 22.32, 21.18, 20.98, 16.61, 16.55, 16.44, 16.38, 9.38, 0.94. <sup>31</sup>P NMR (162 MHz, CDCl<sub>3</sub>) δ 28.19. HRMS calcd for  $C_{38}H_{55}NaO_{11}P^+$ :  $[M+Na]^+$  741.3374, found 741.3377.

## 9. Spectra

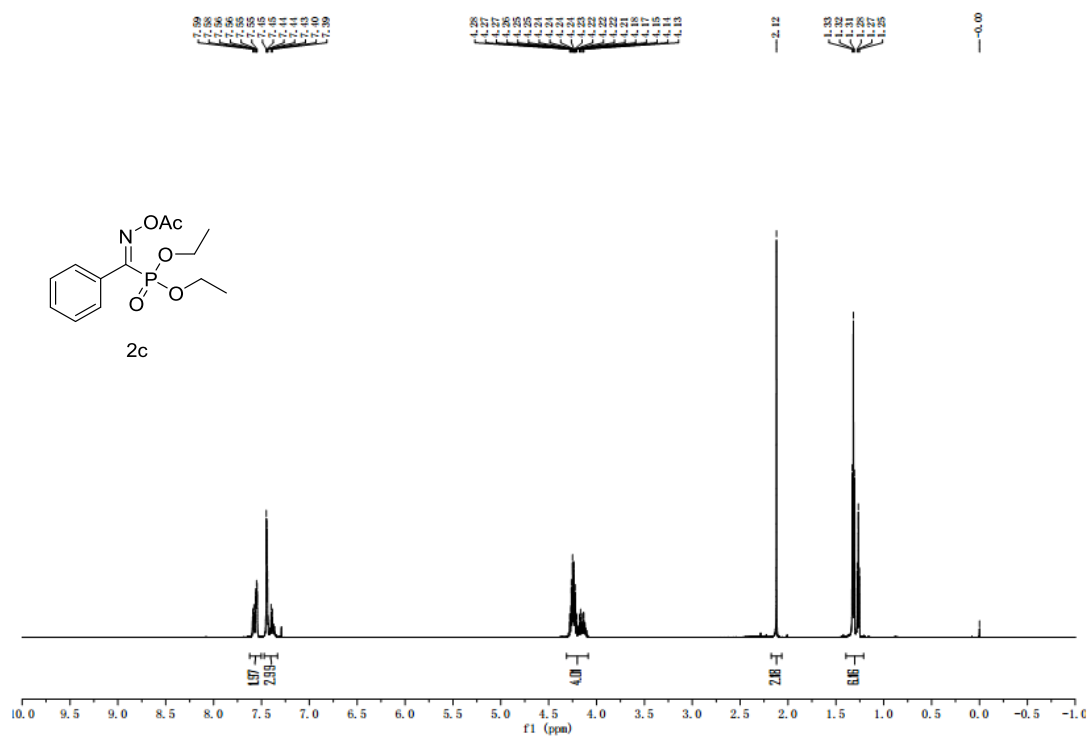

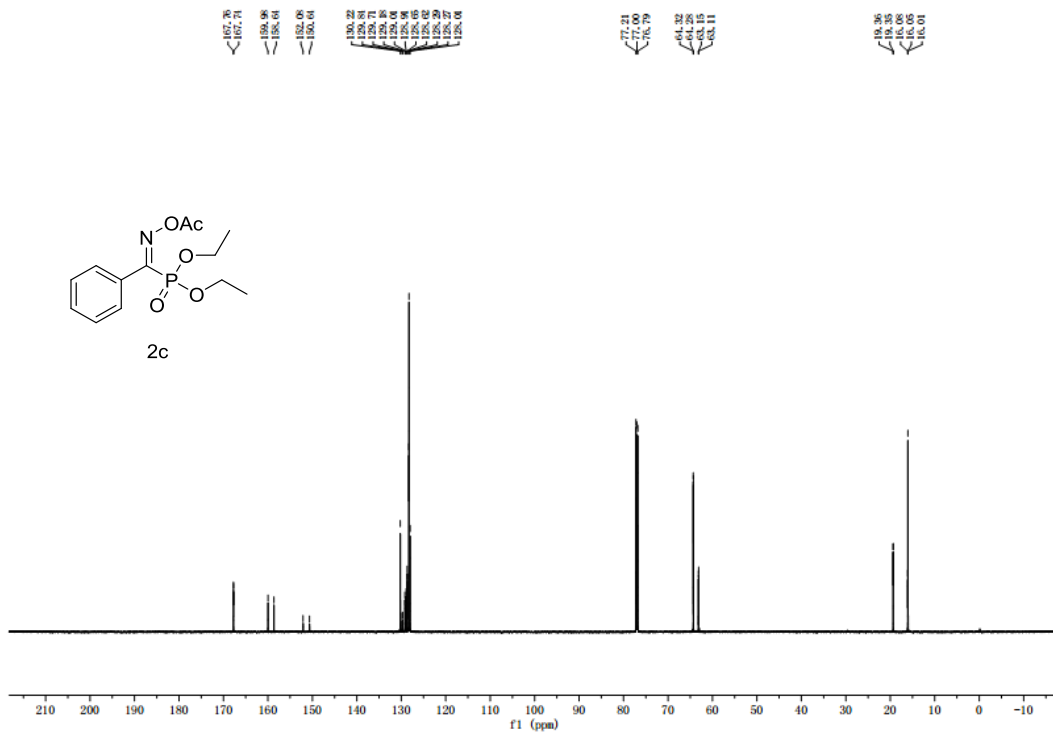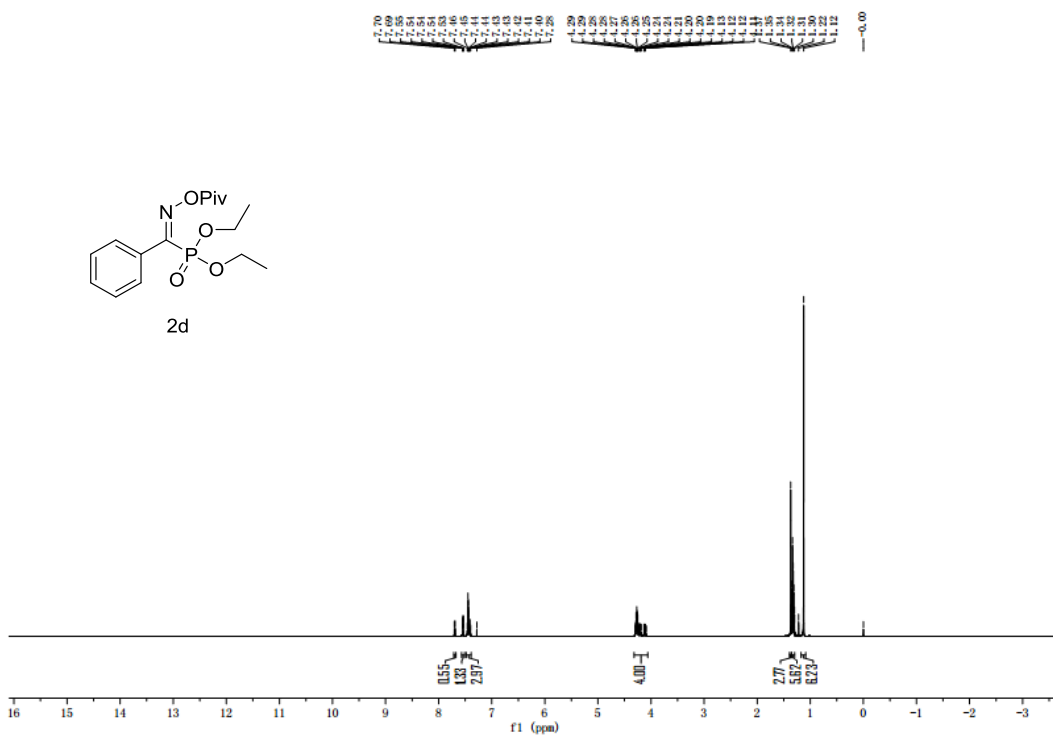

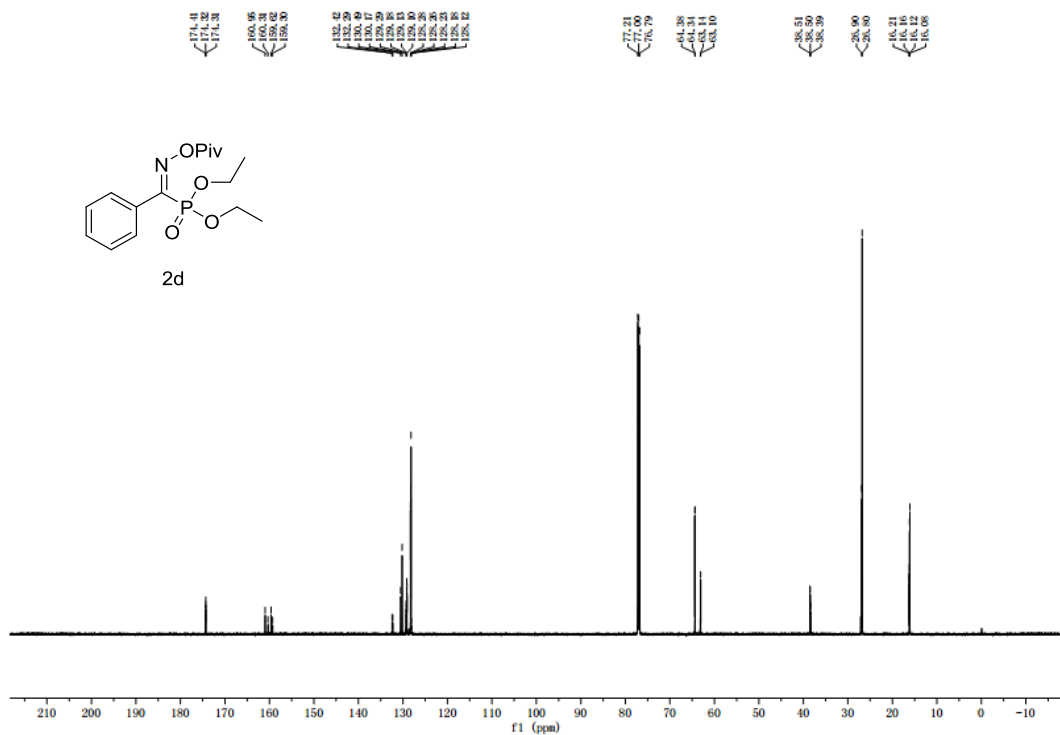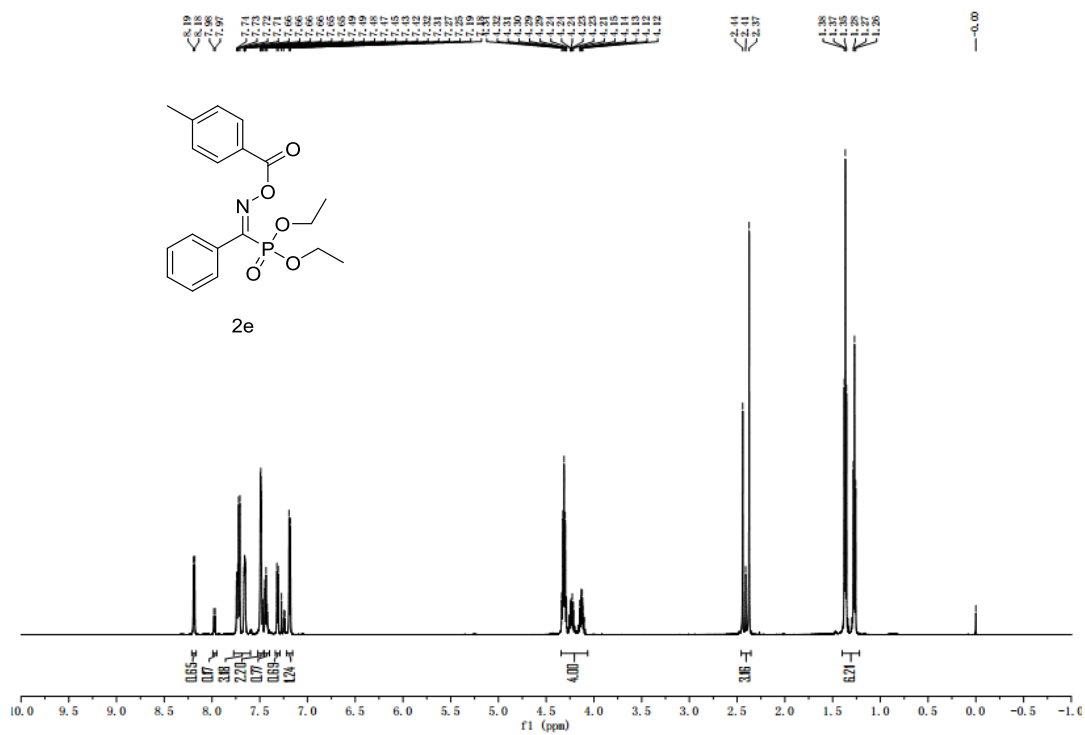



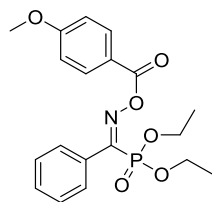

2f

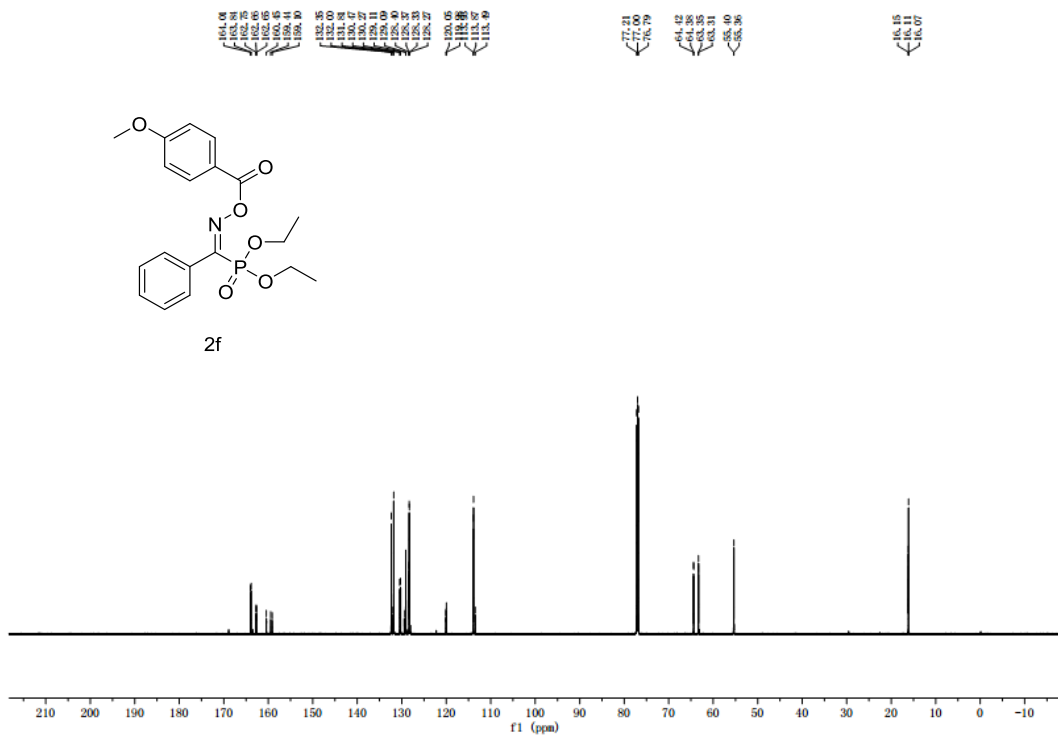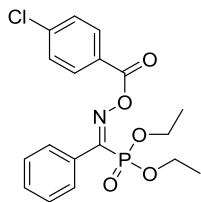

2g

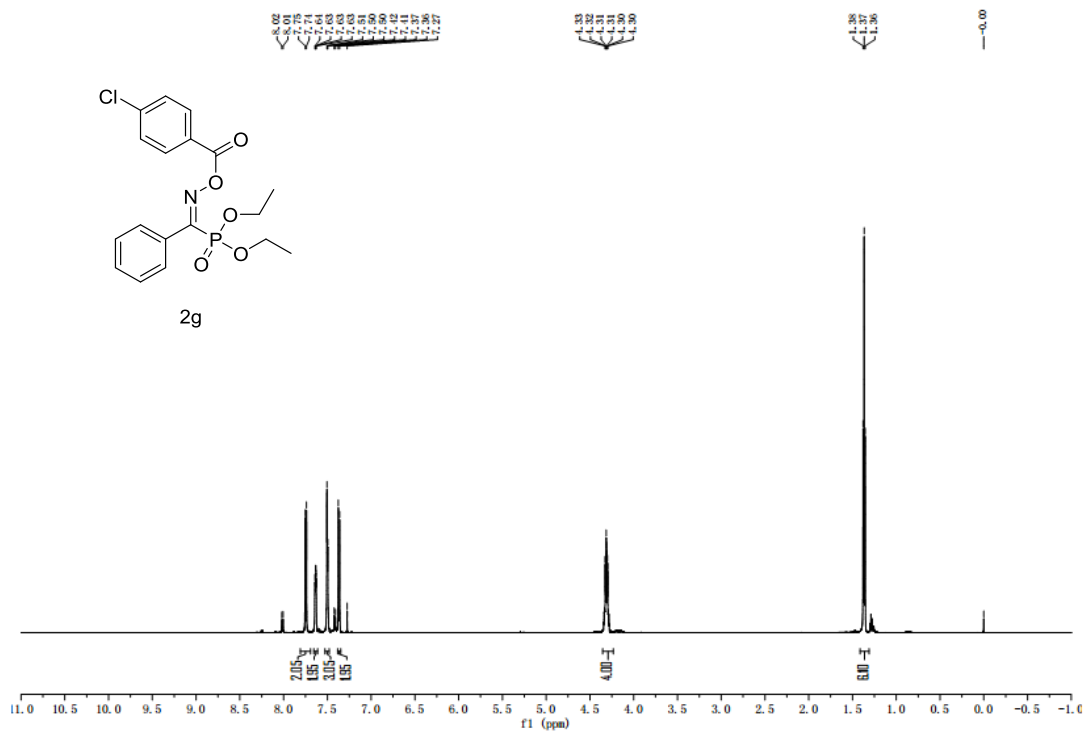

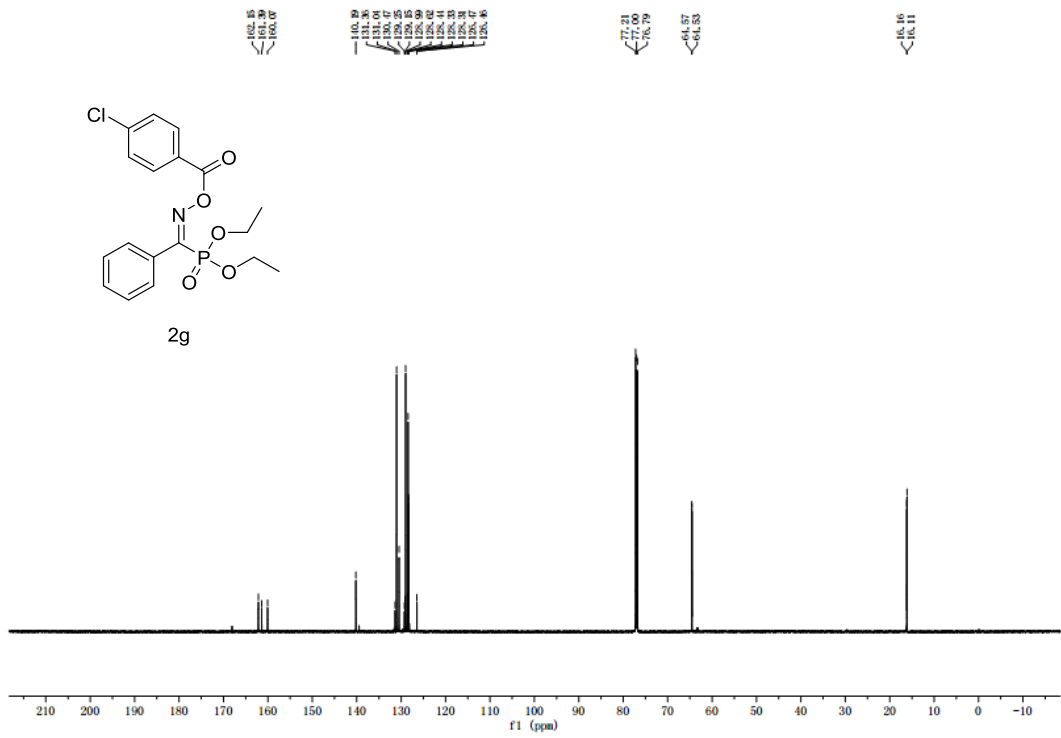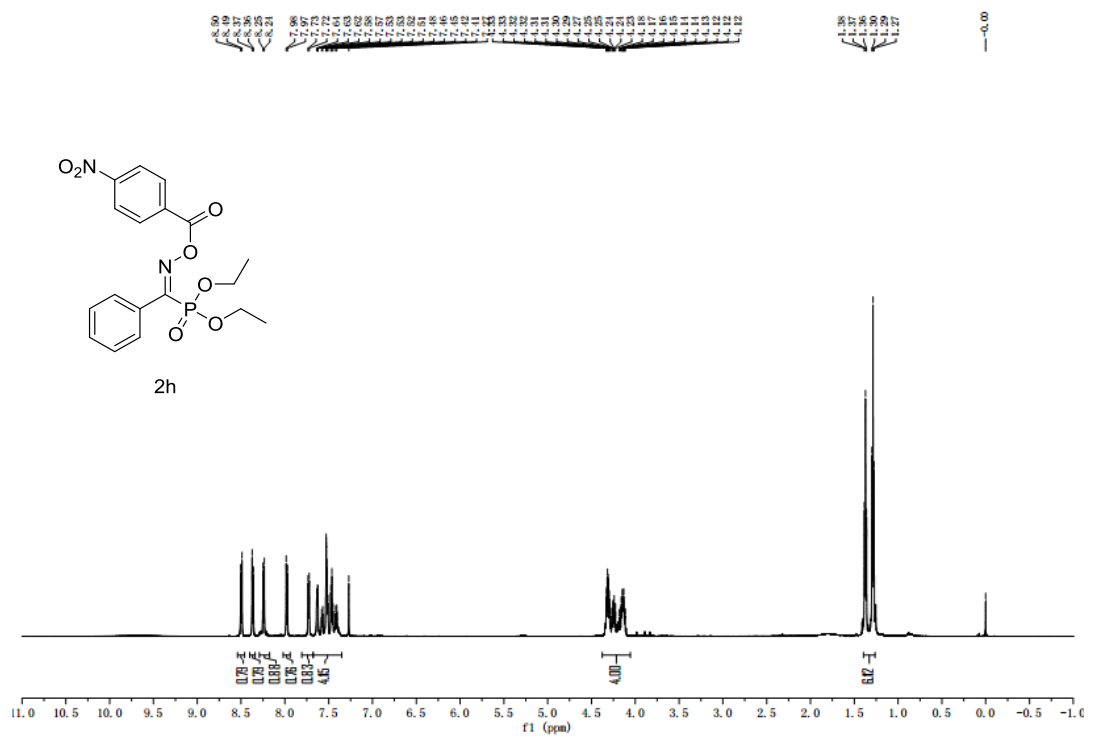





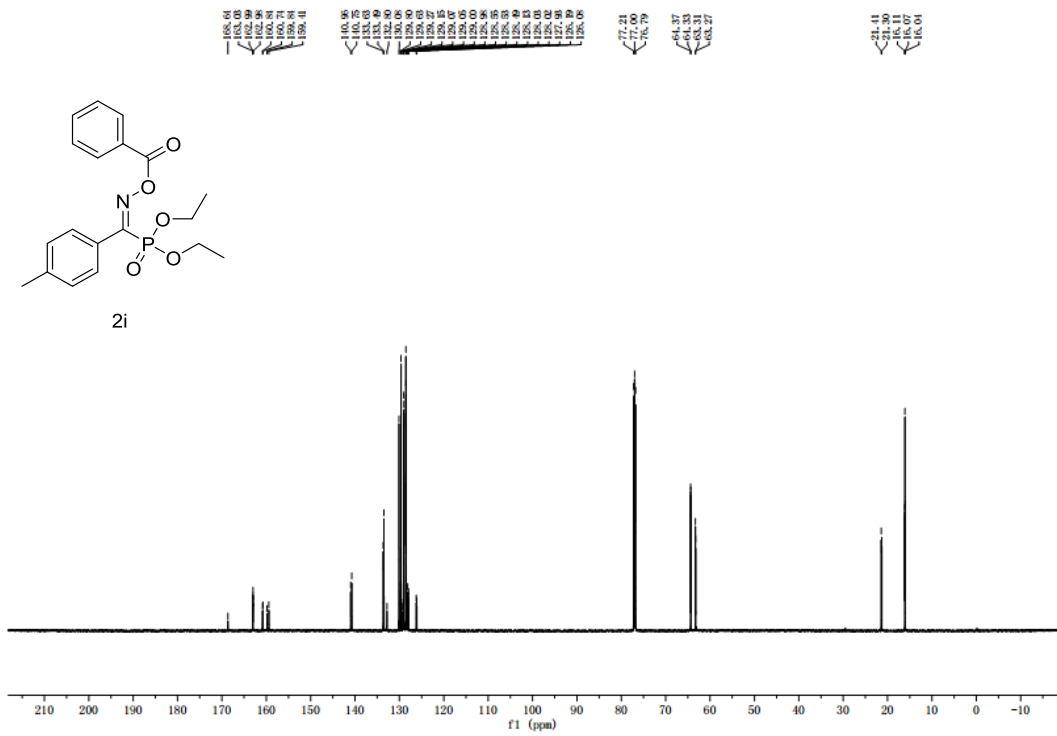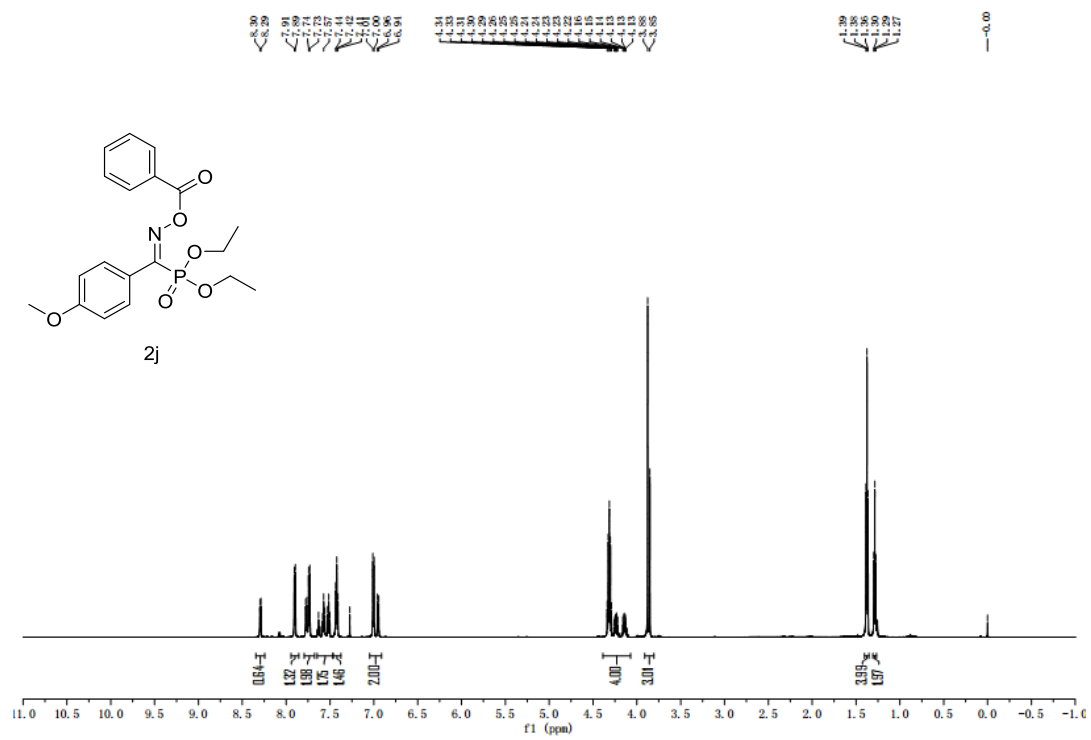



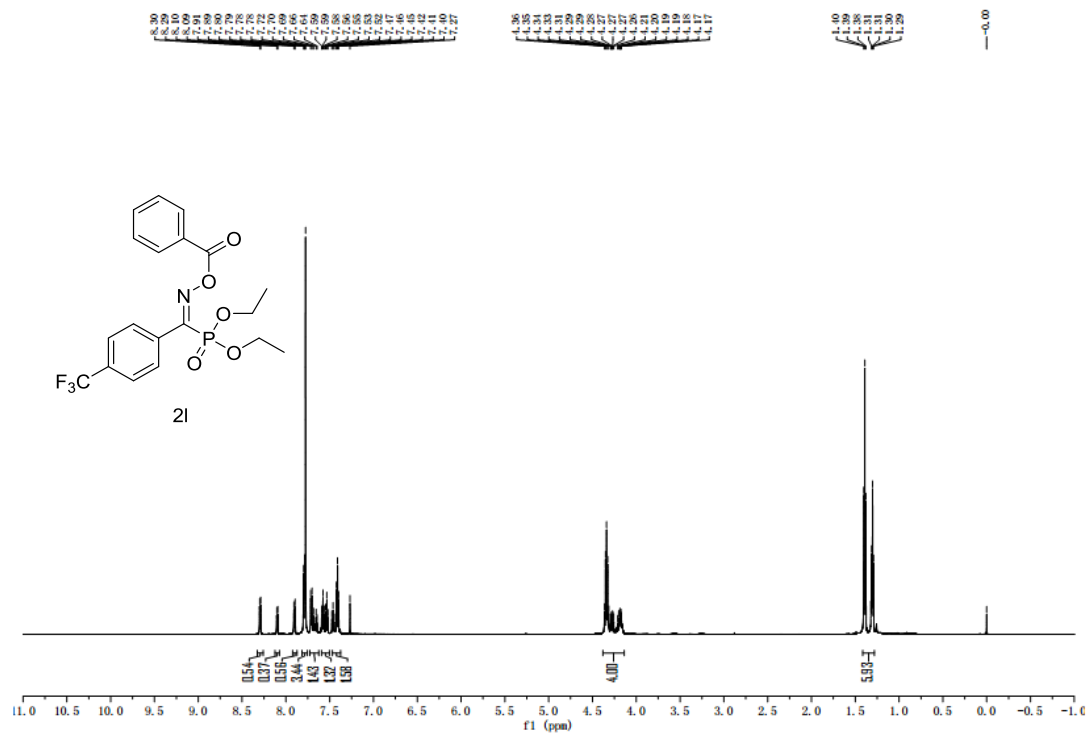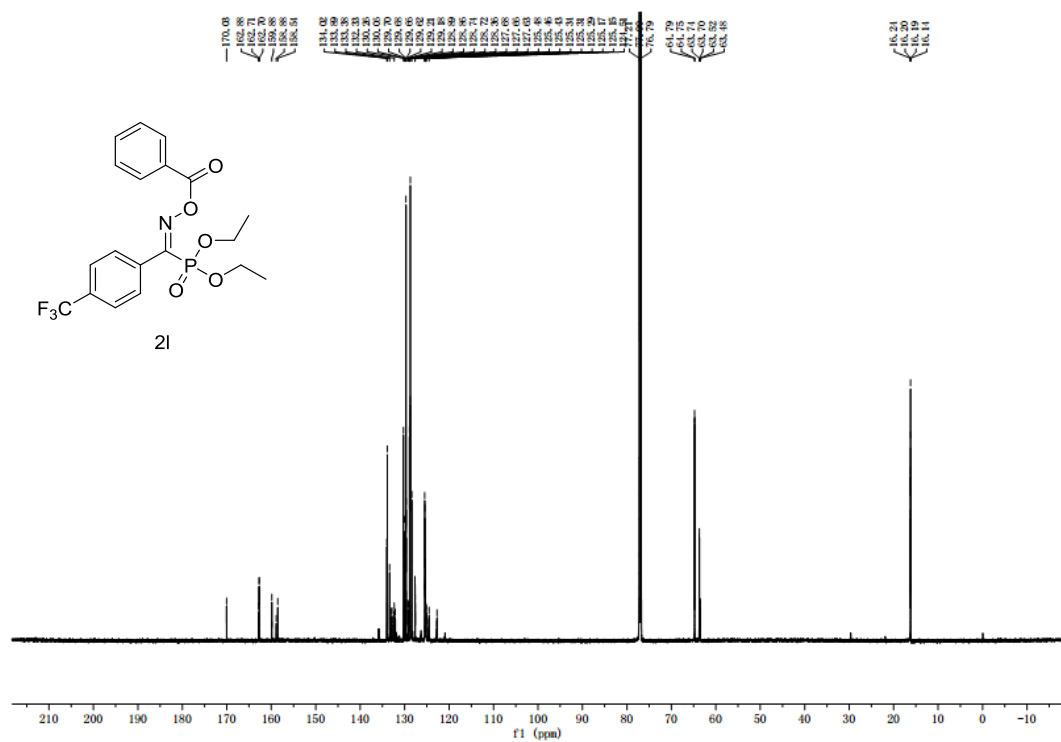

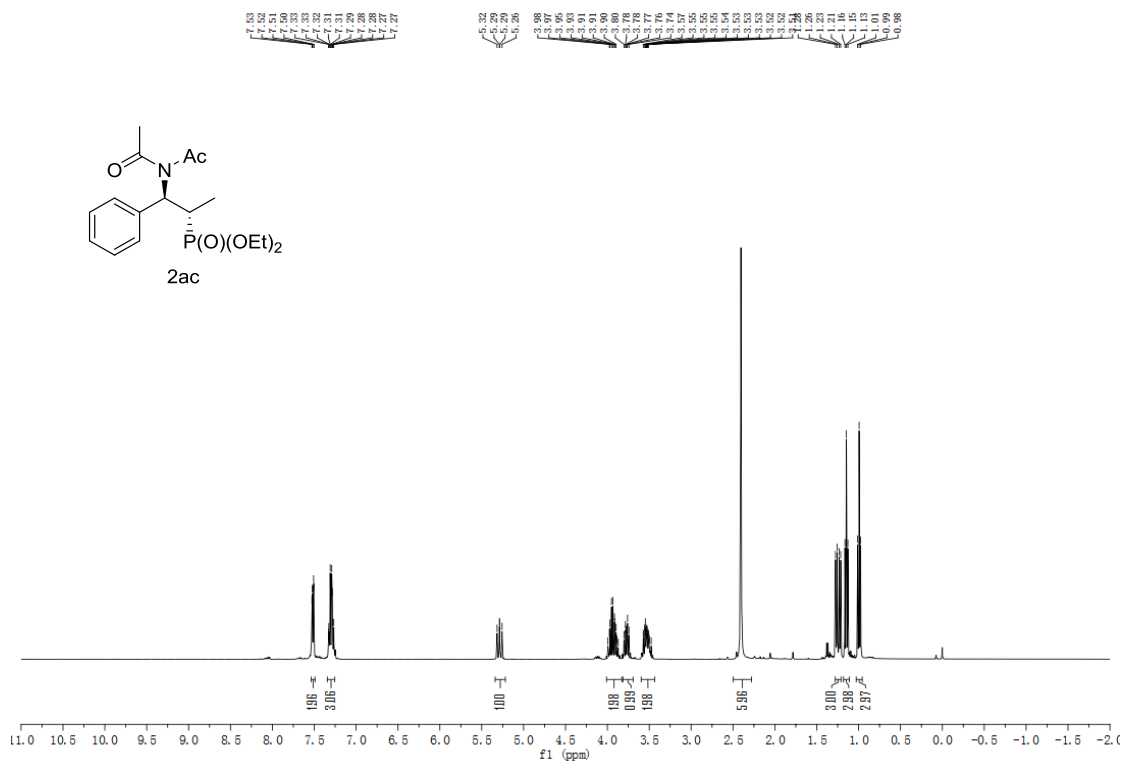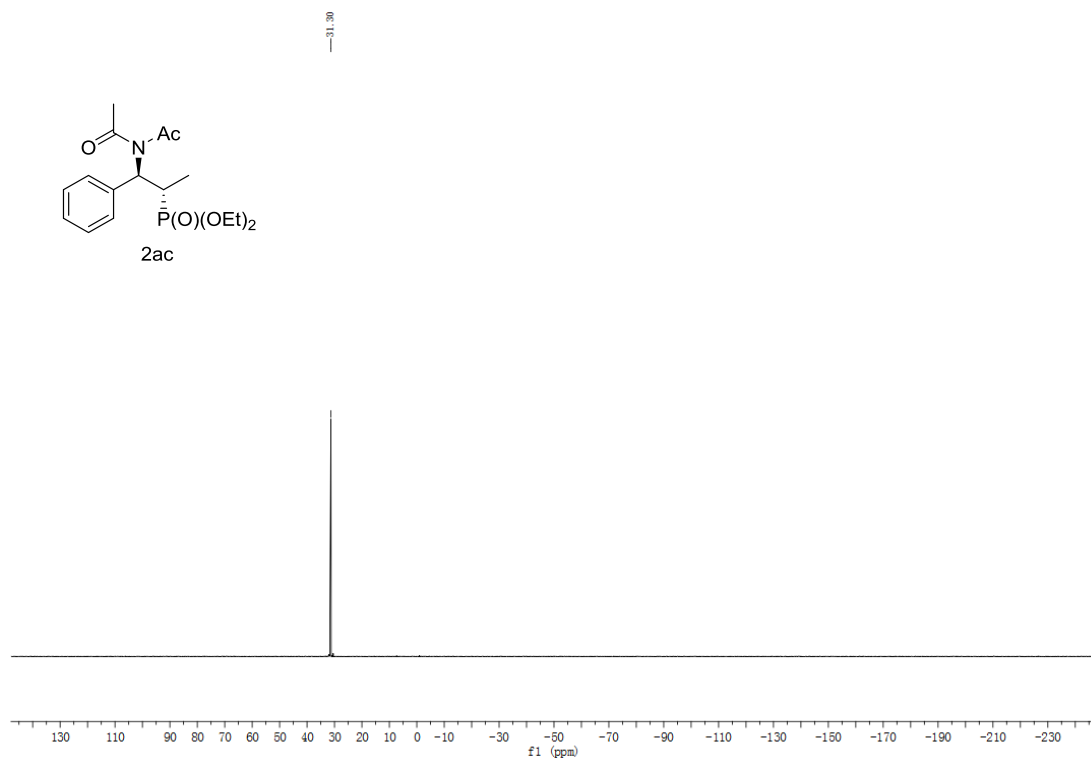

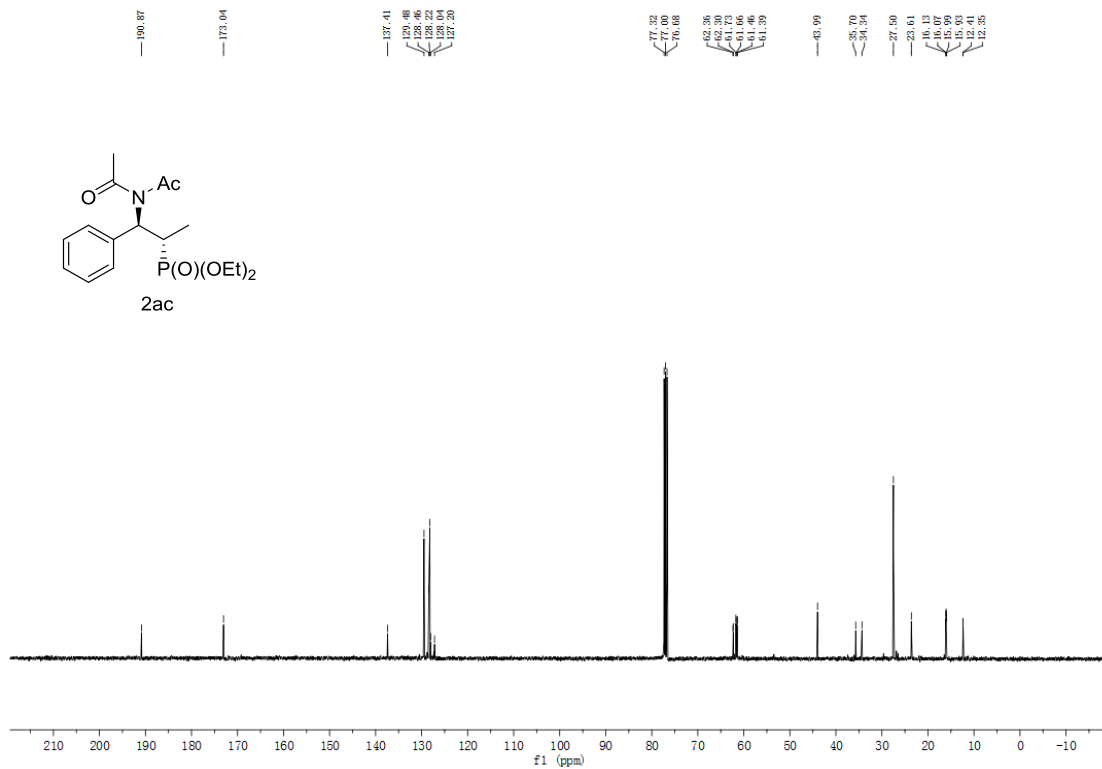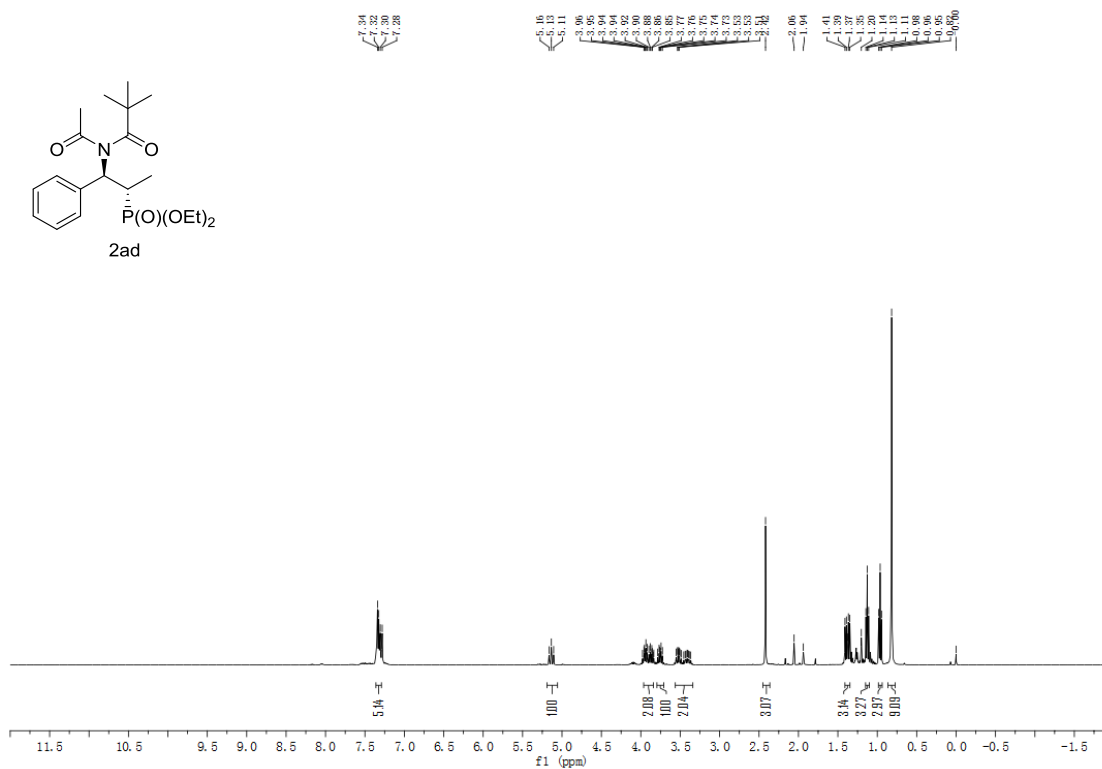

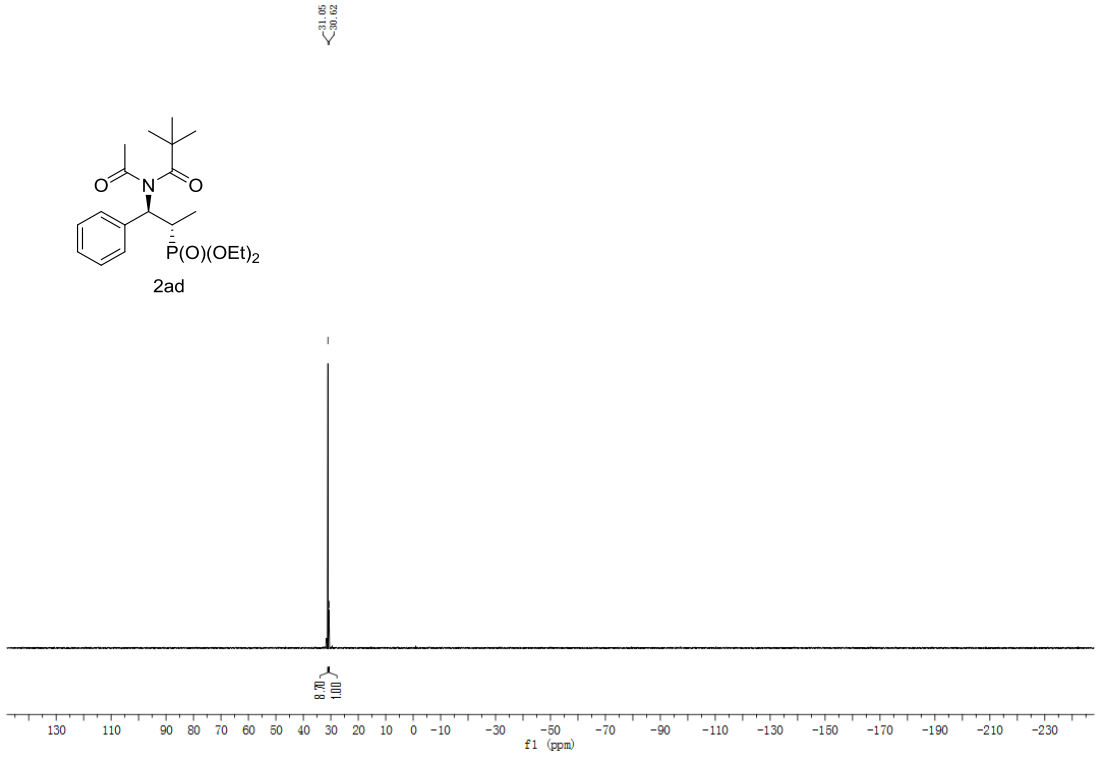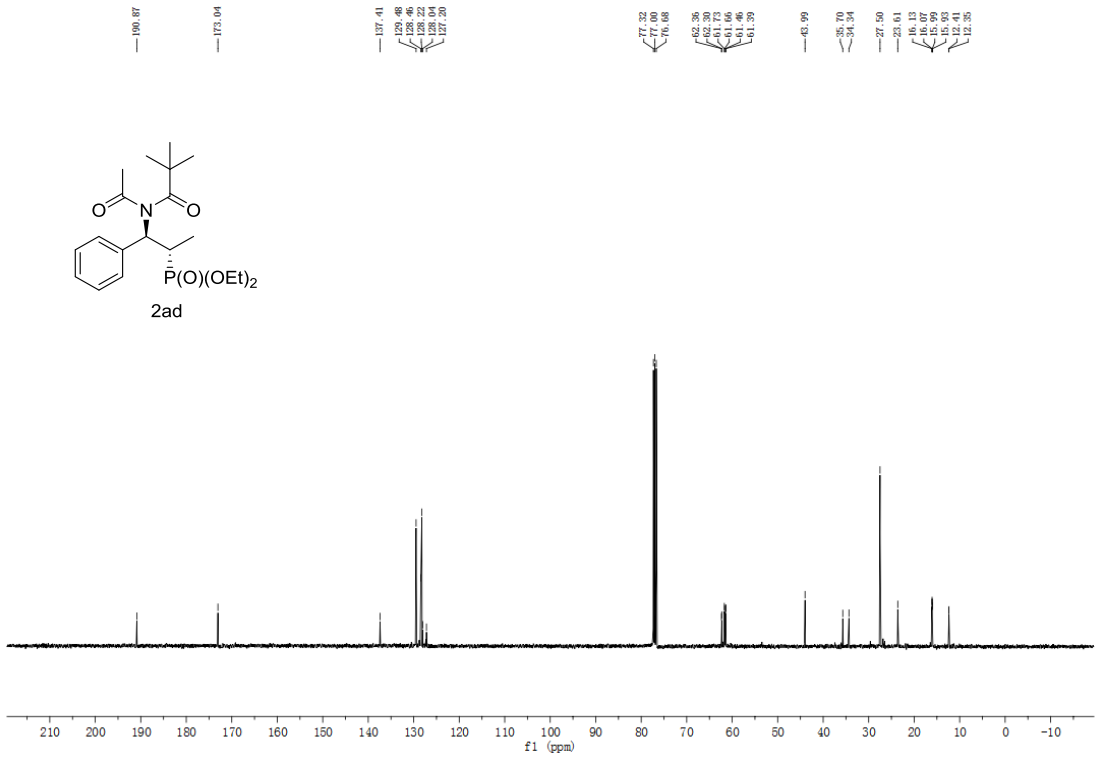

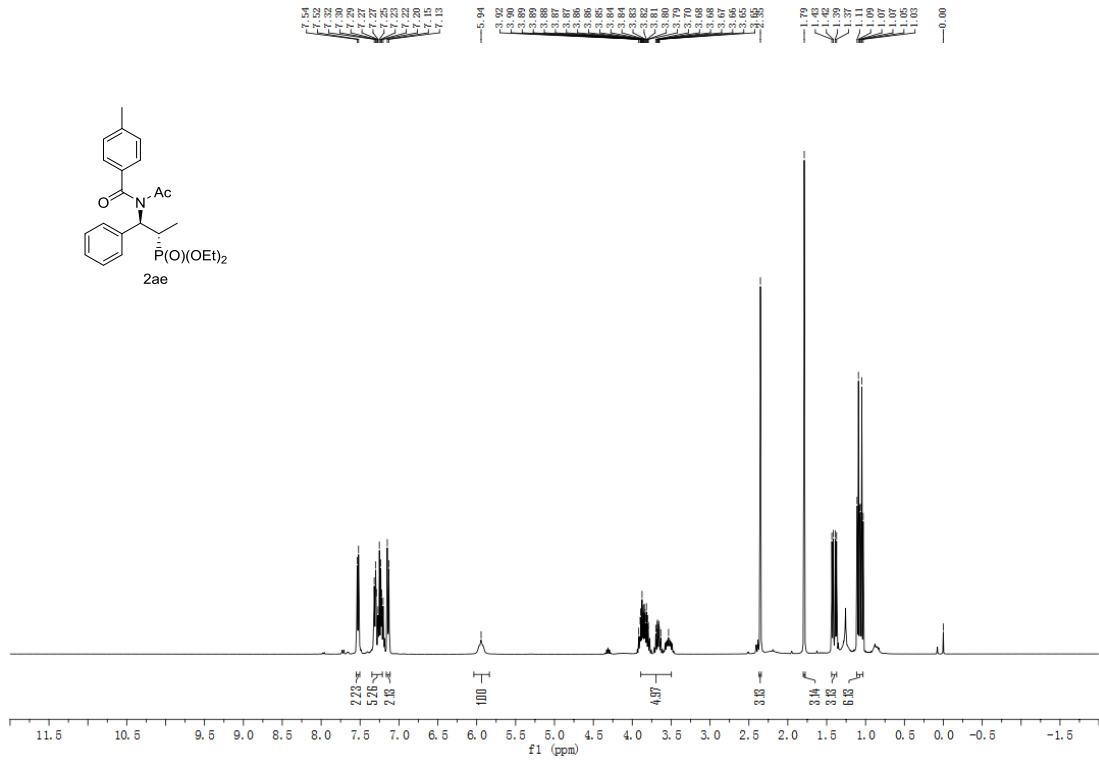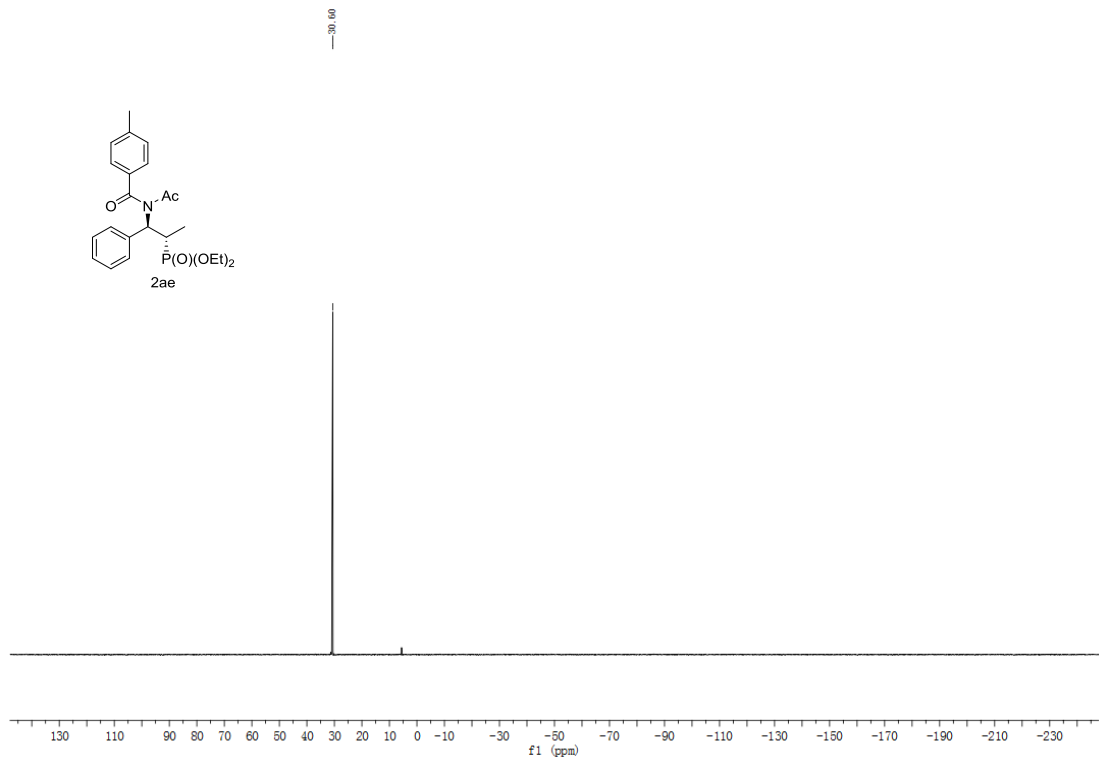



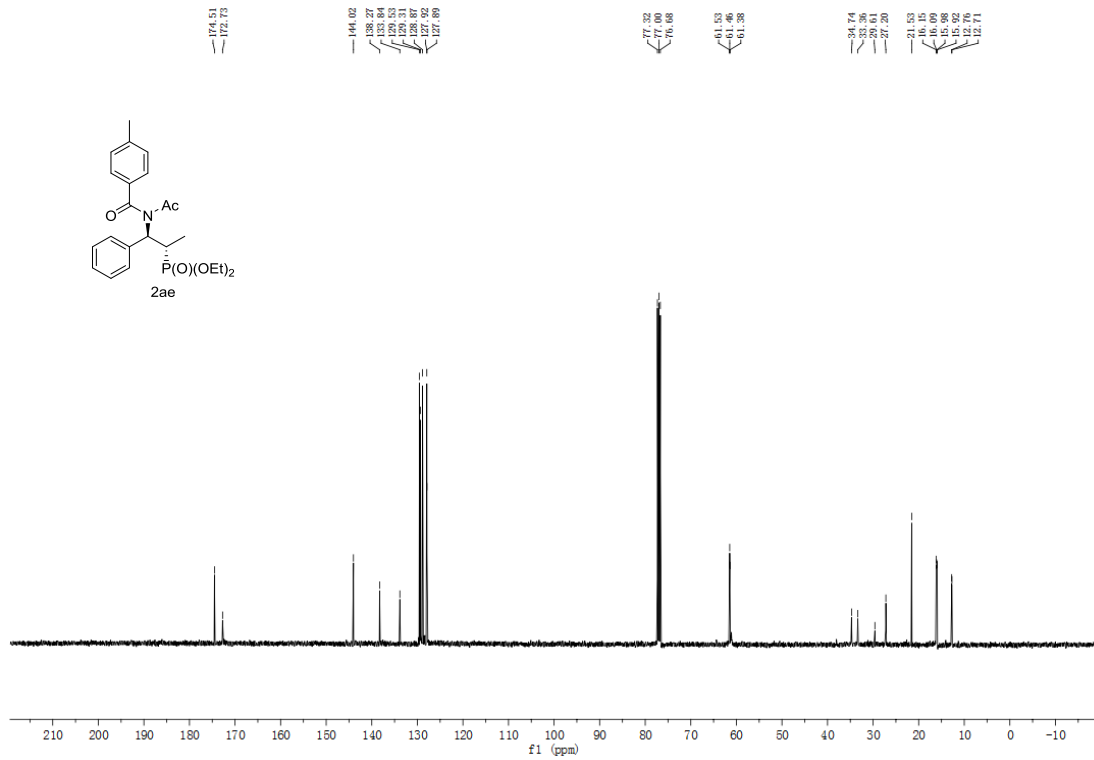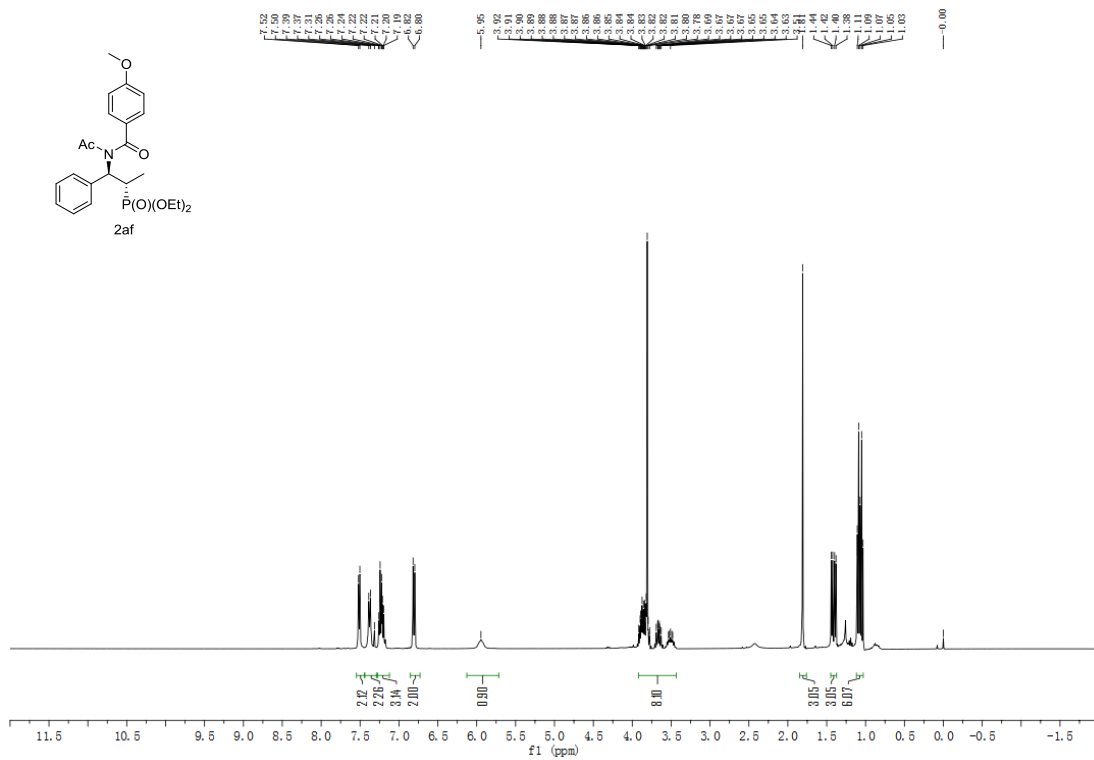

wch2295-2

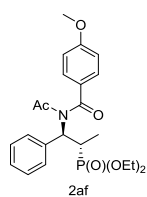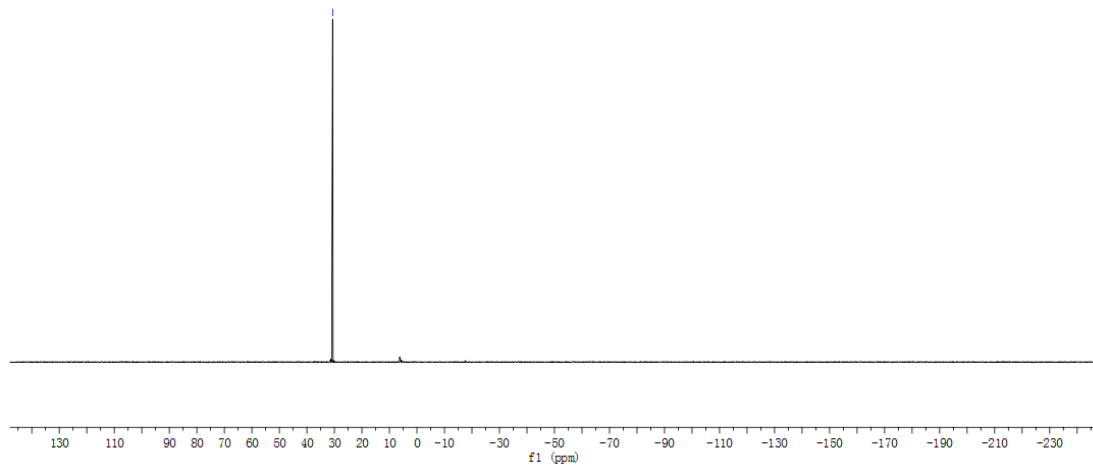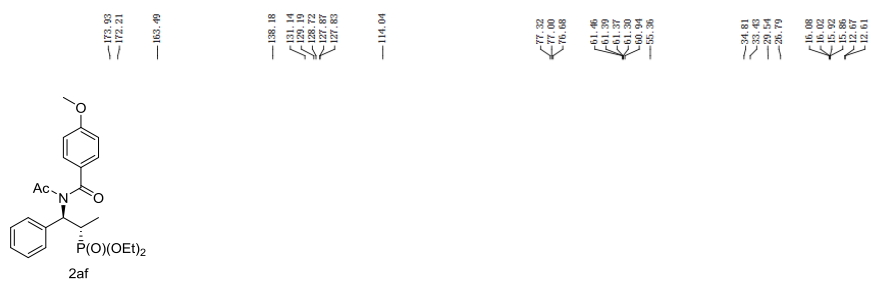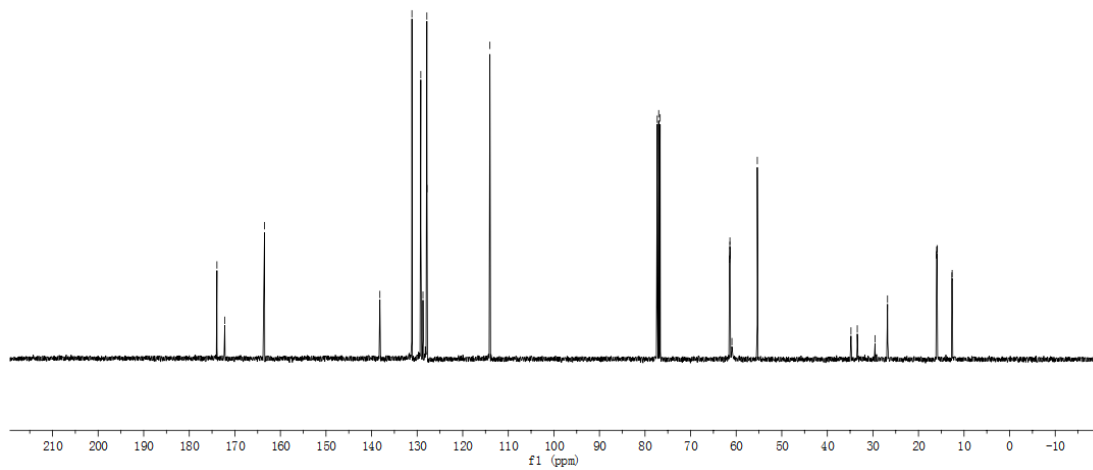

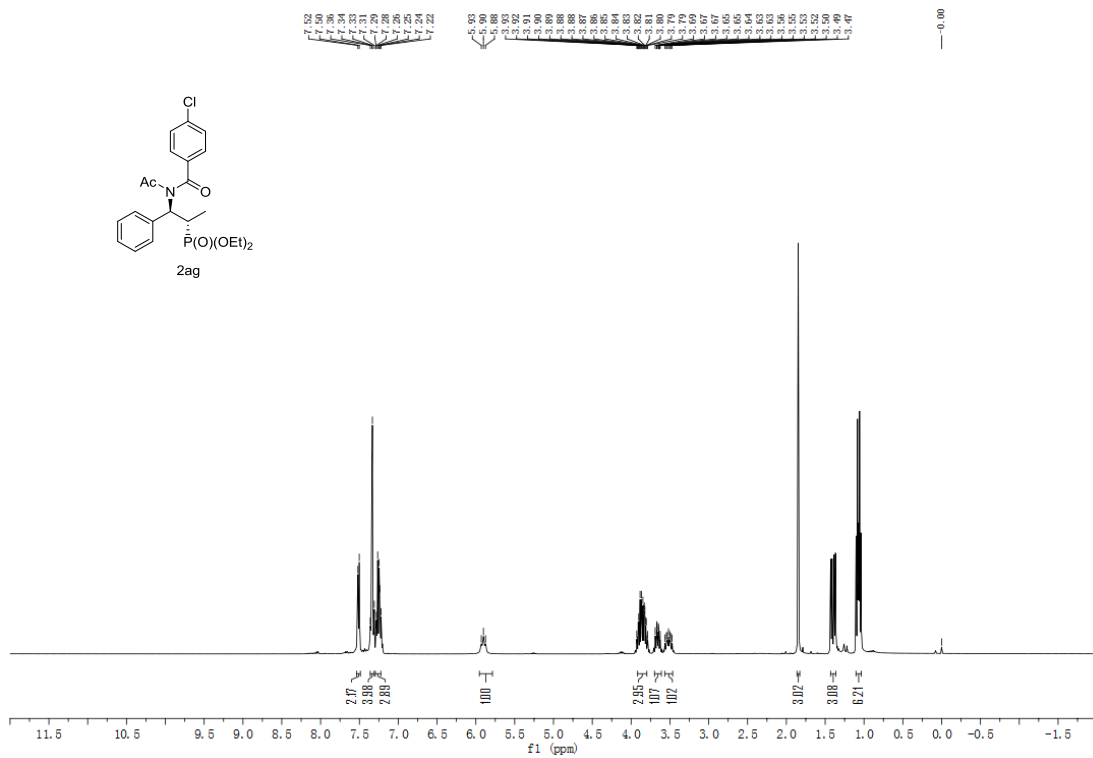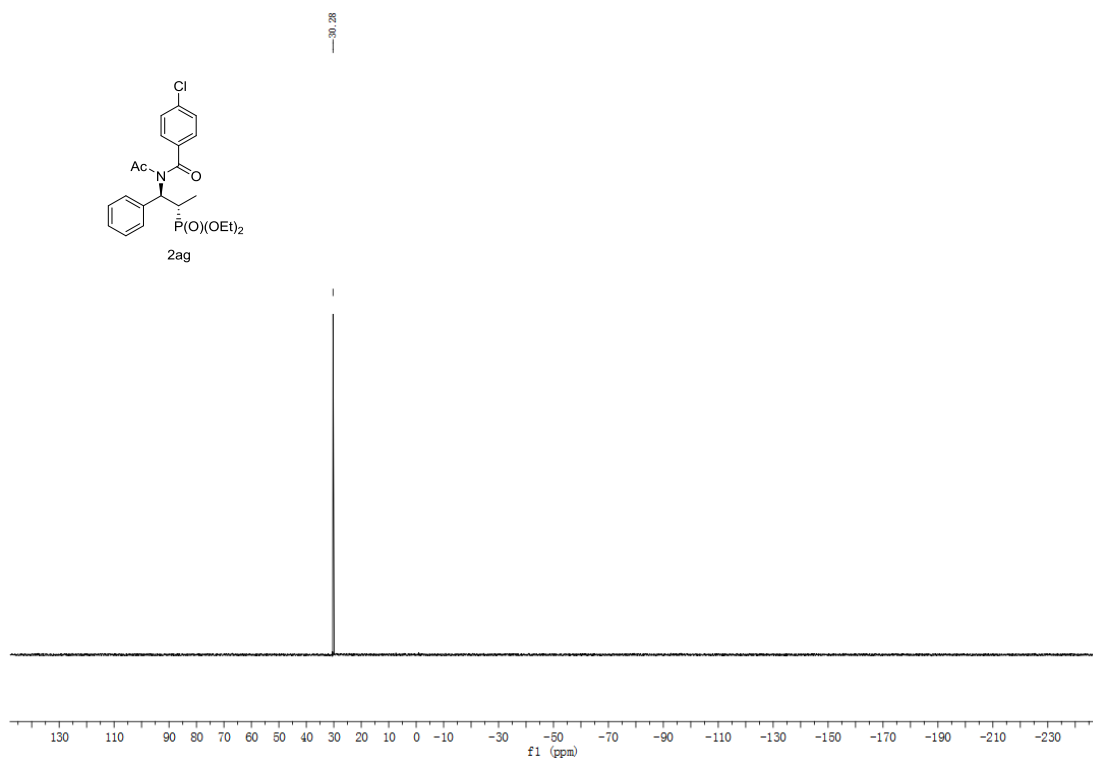

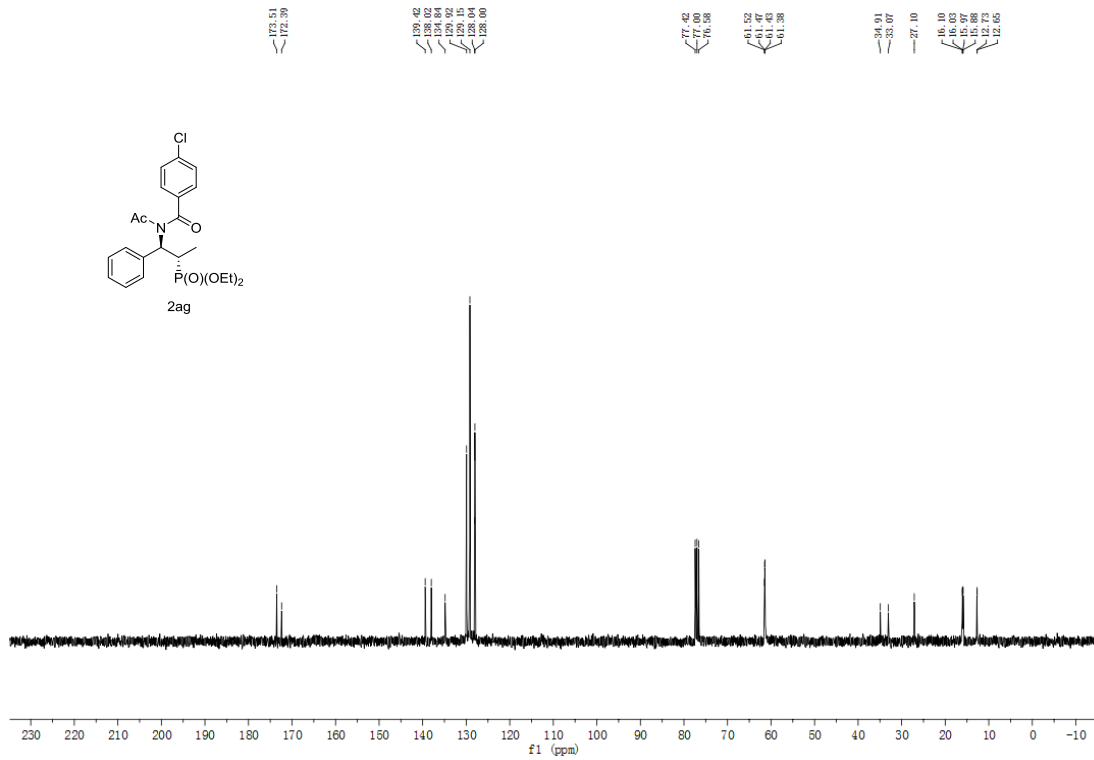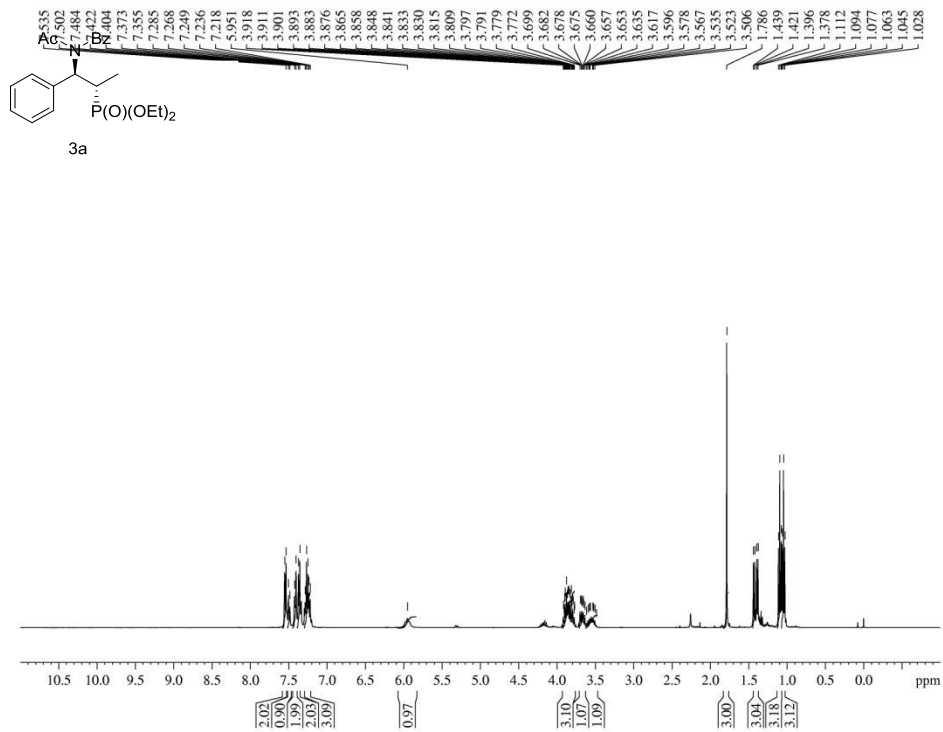

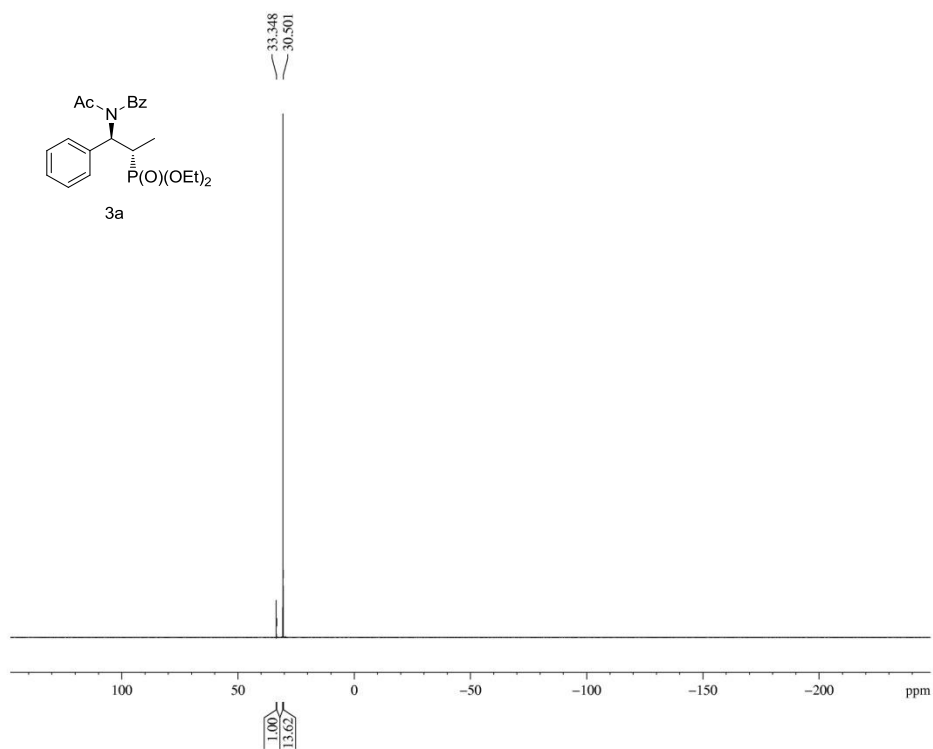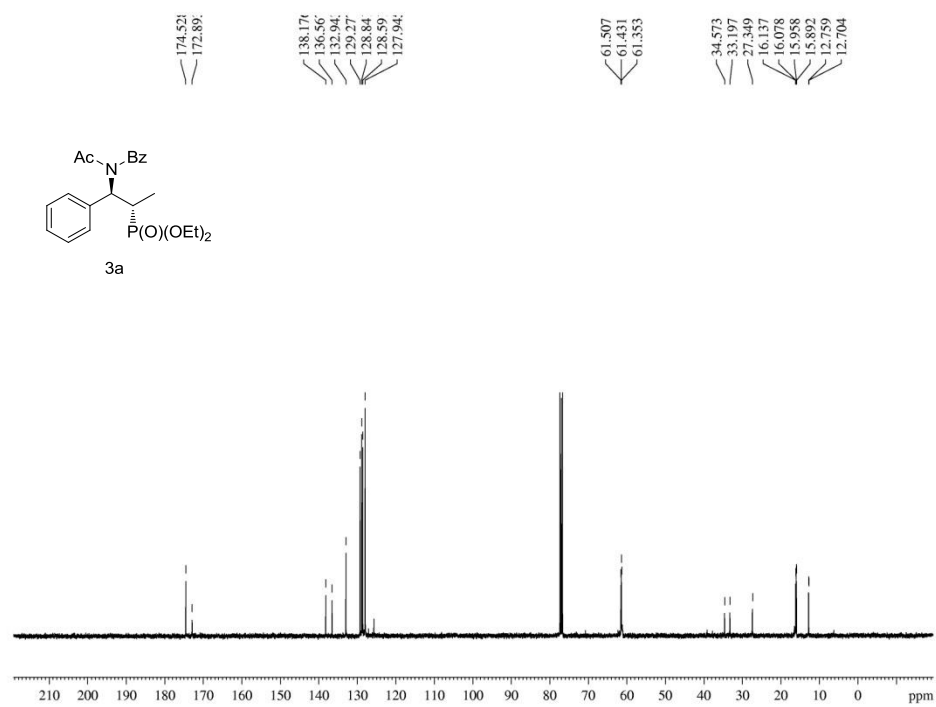

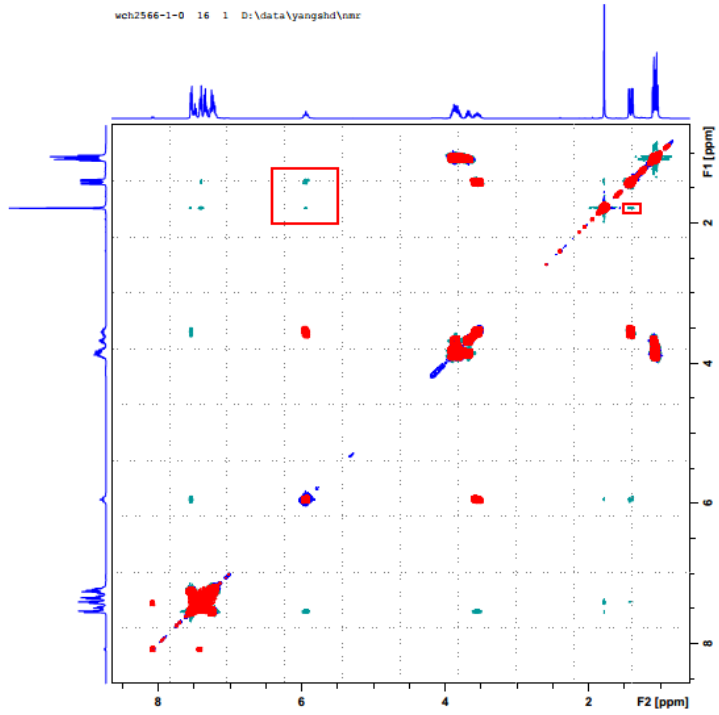

3a NOESY-COSY

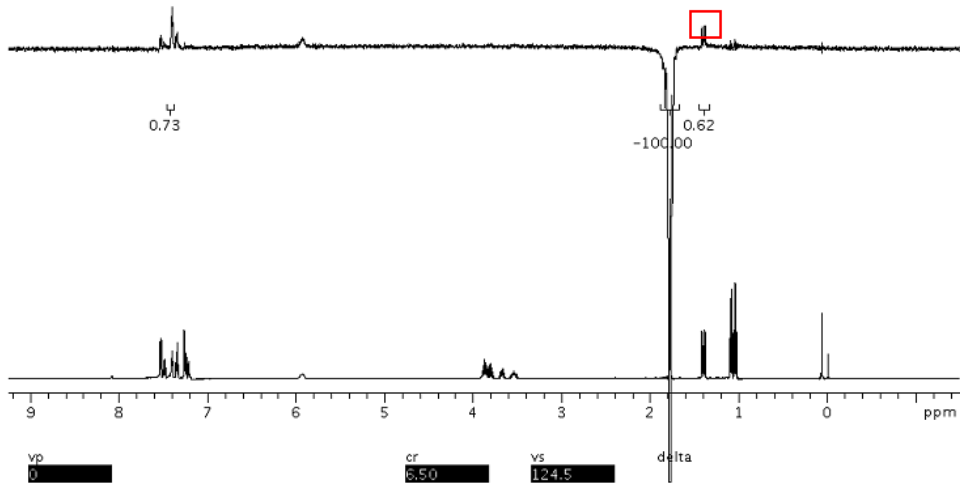

3a 1D-NOESY

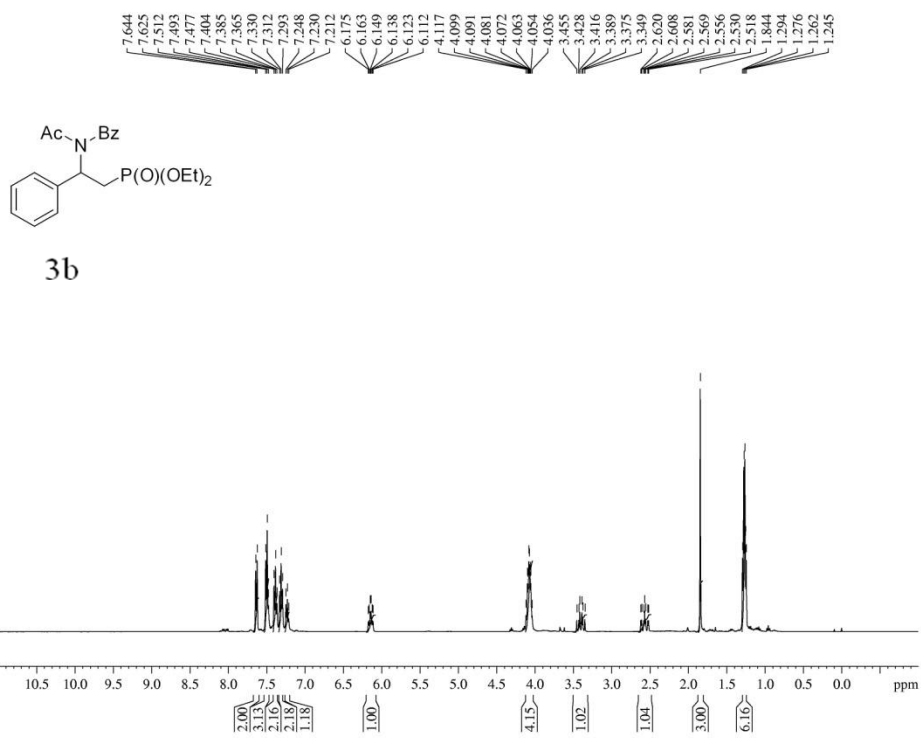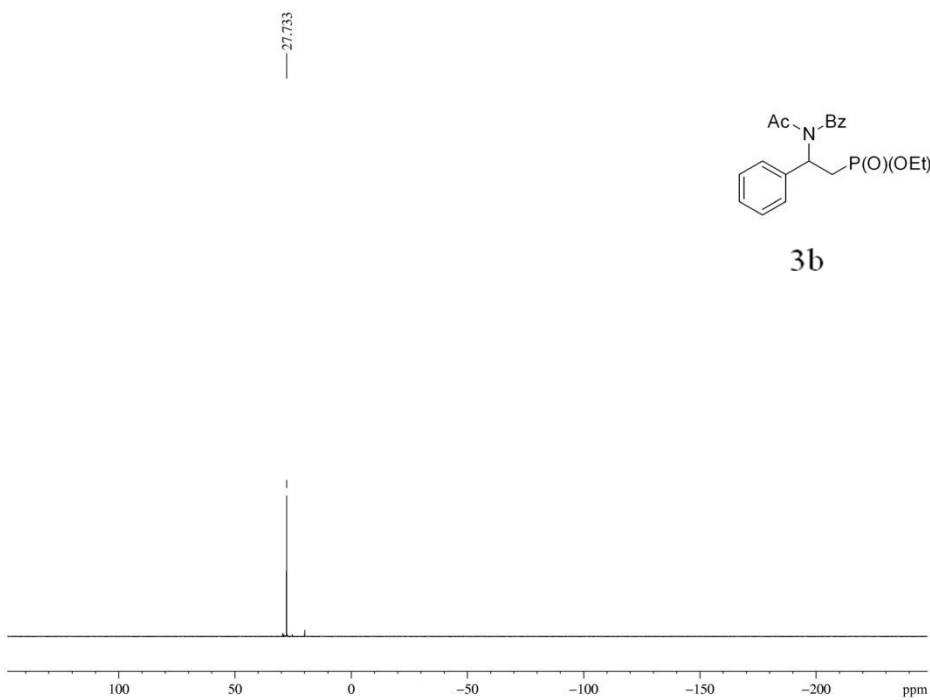

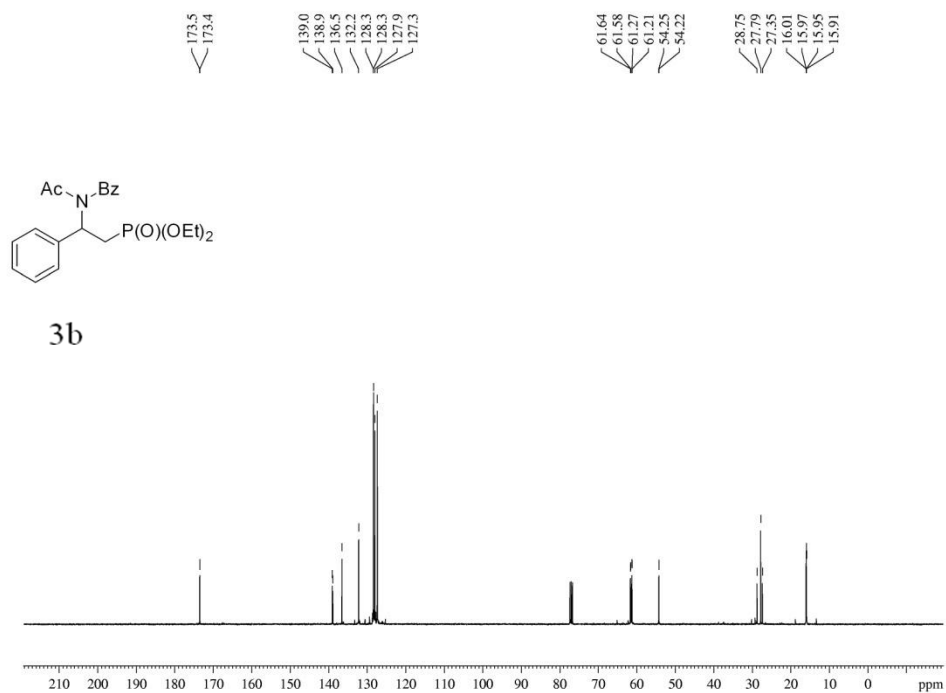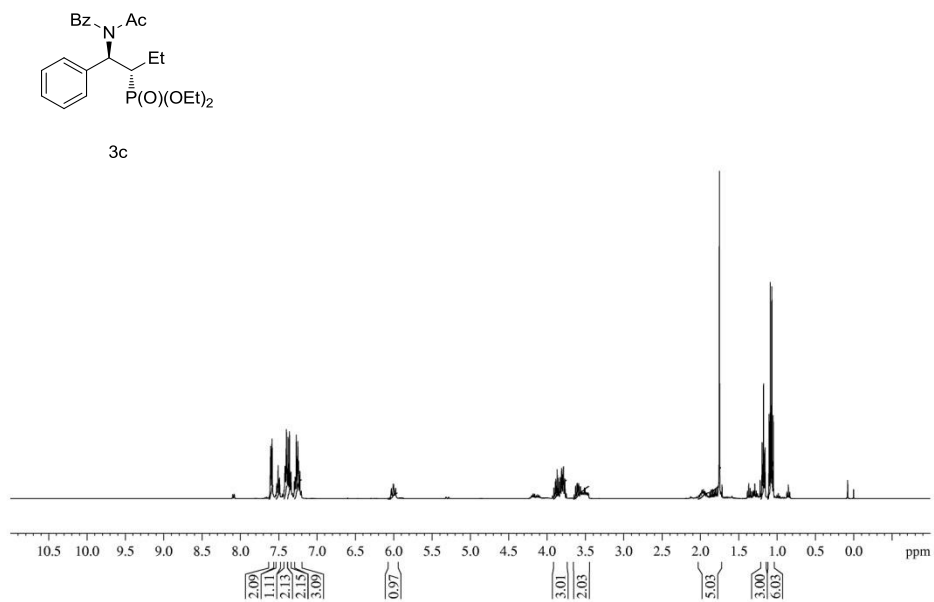



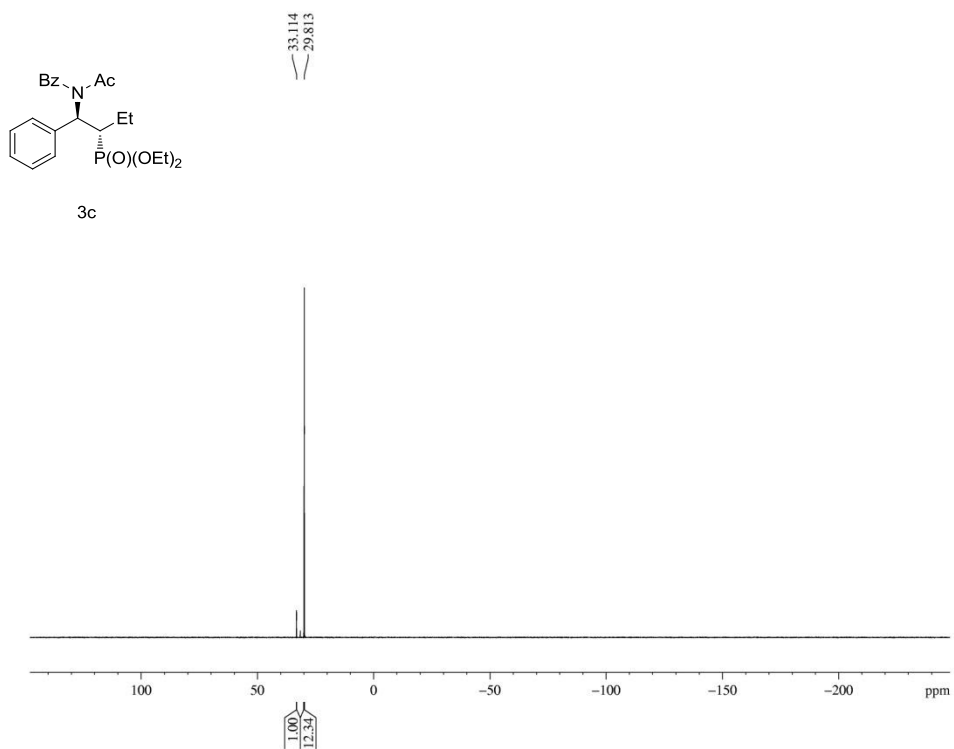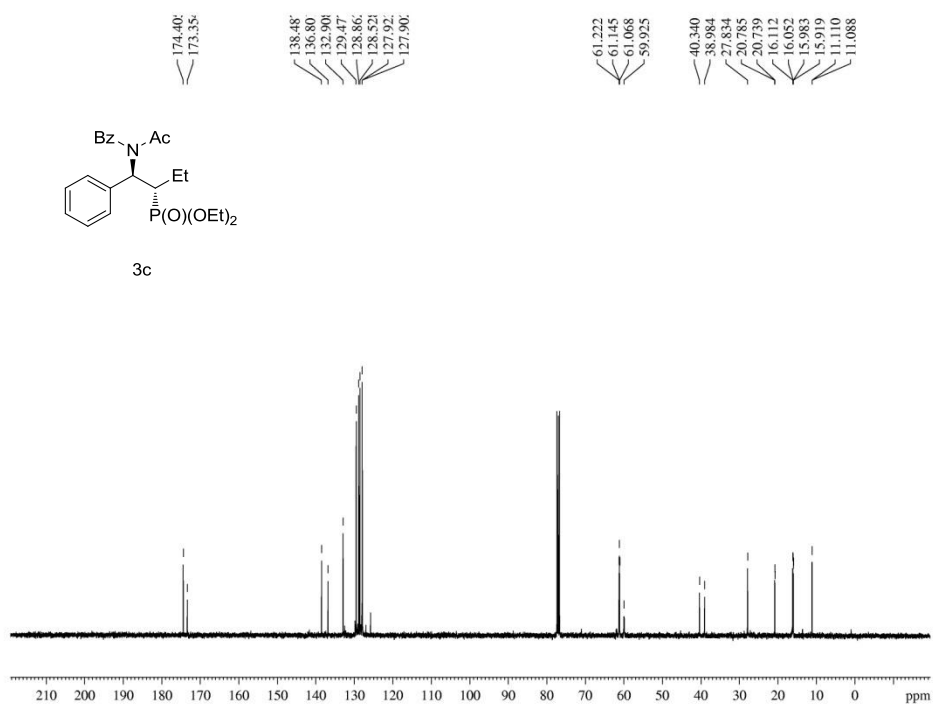

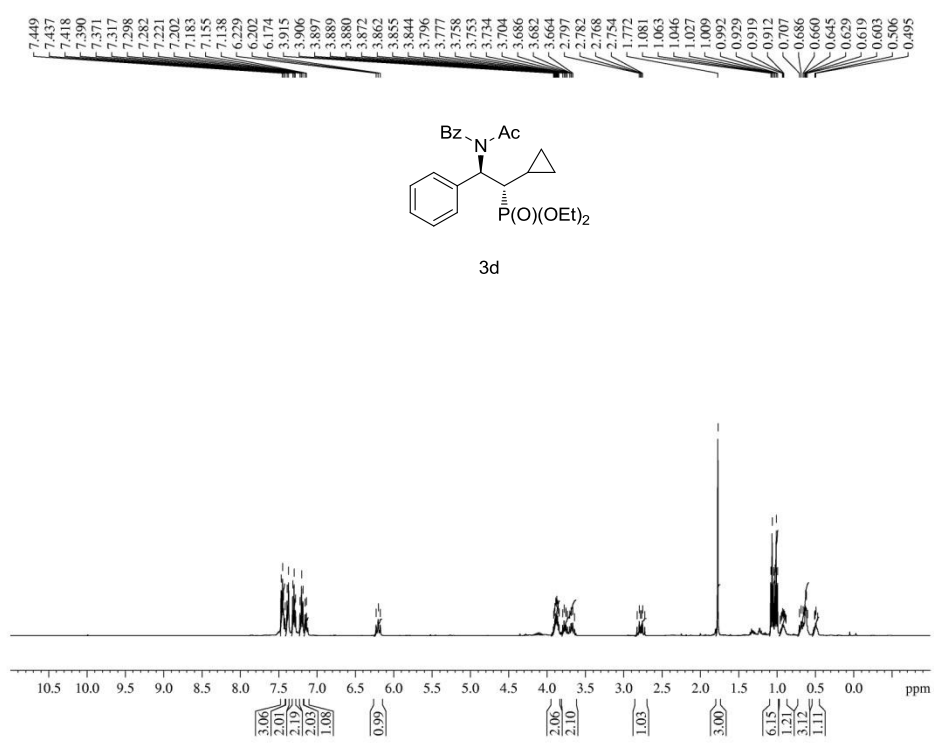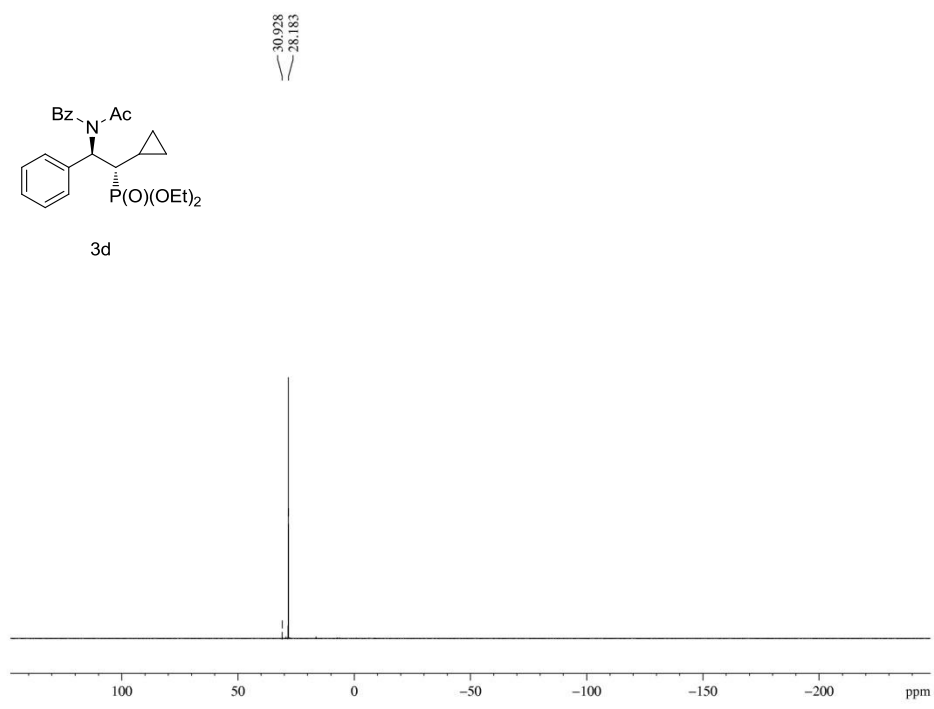

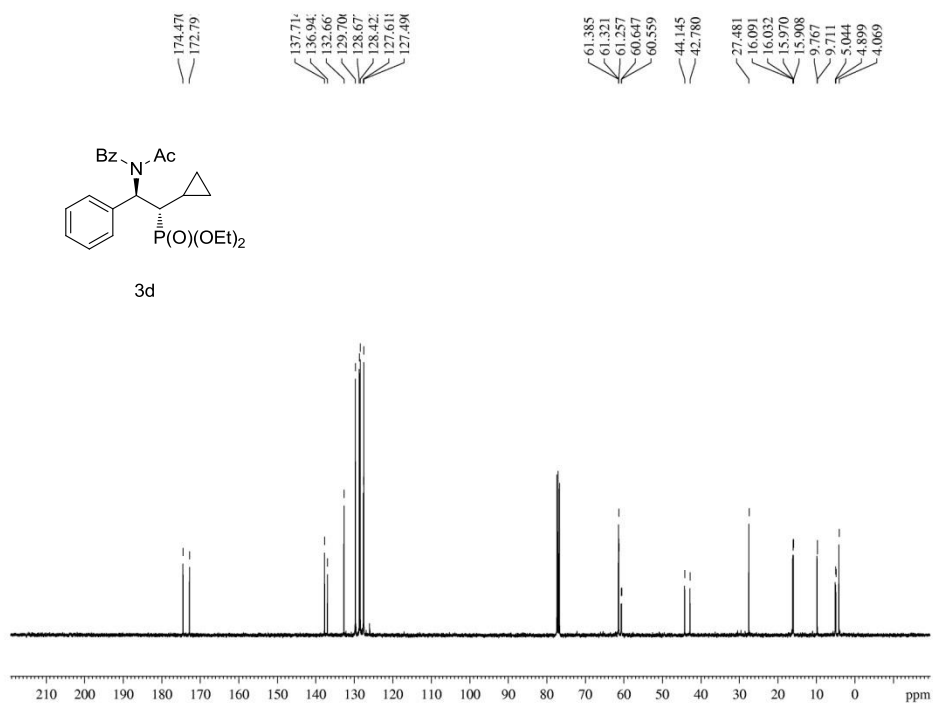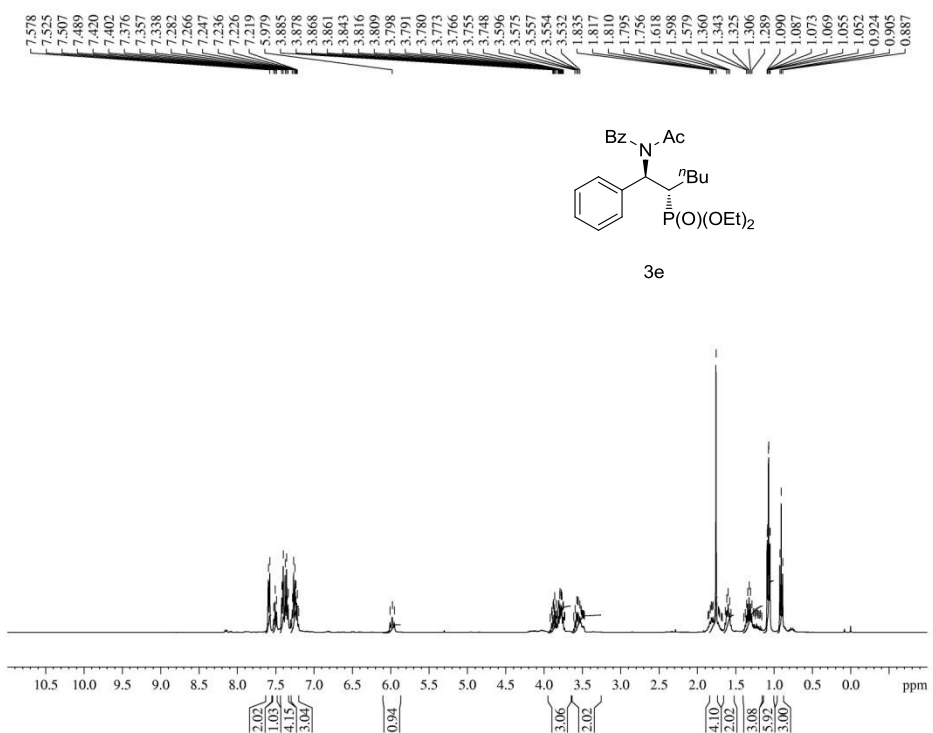

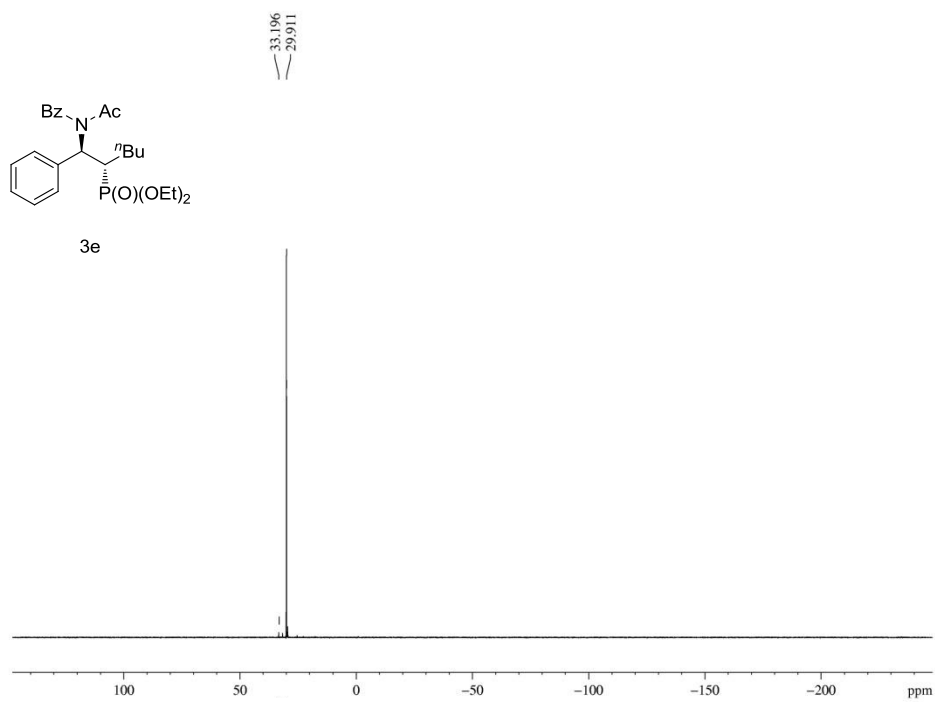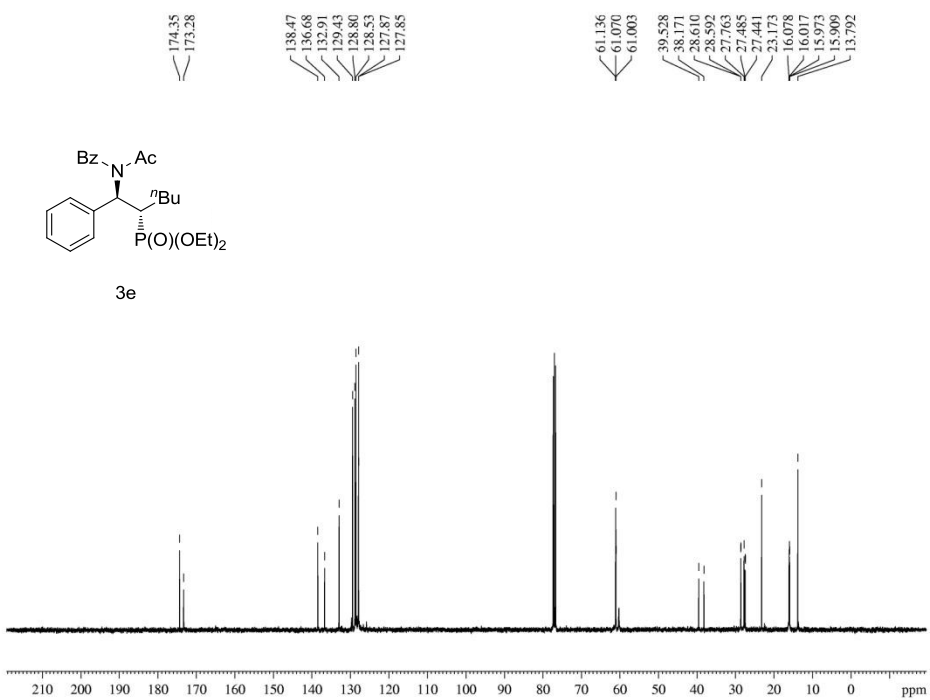

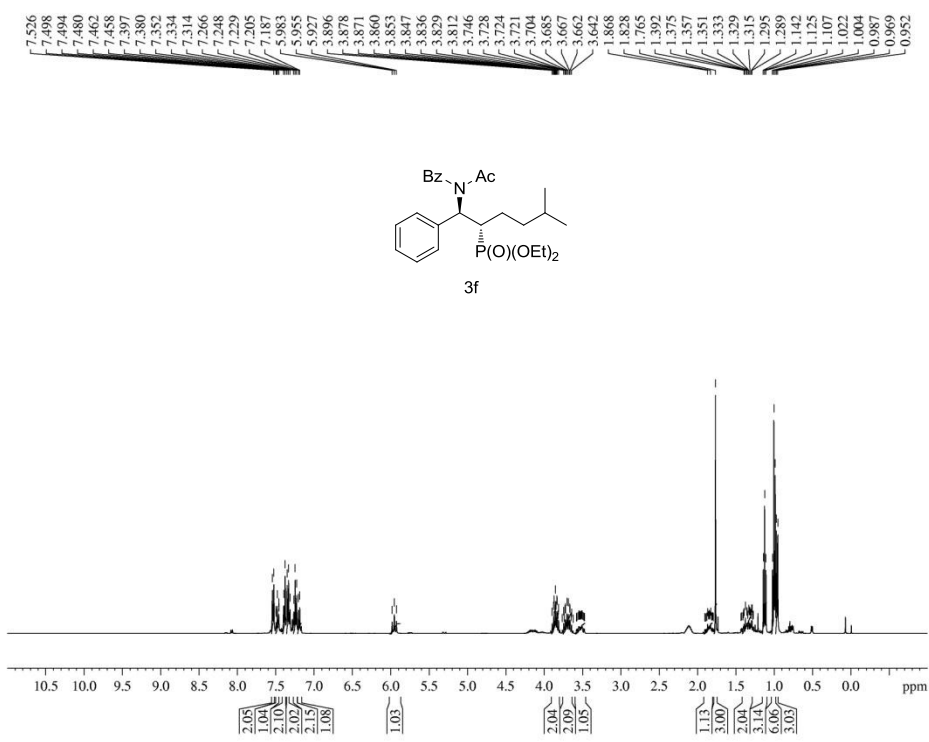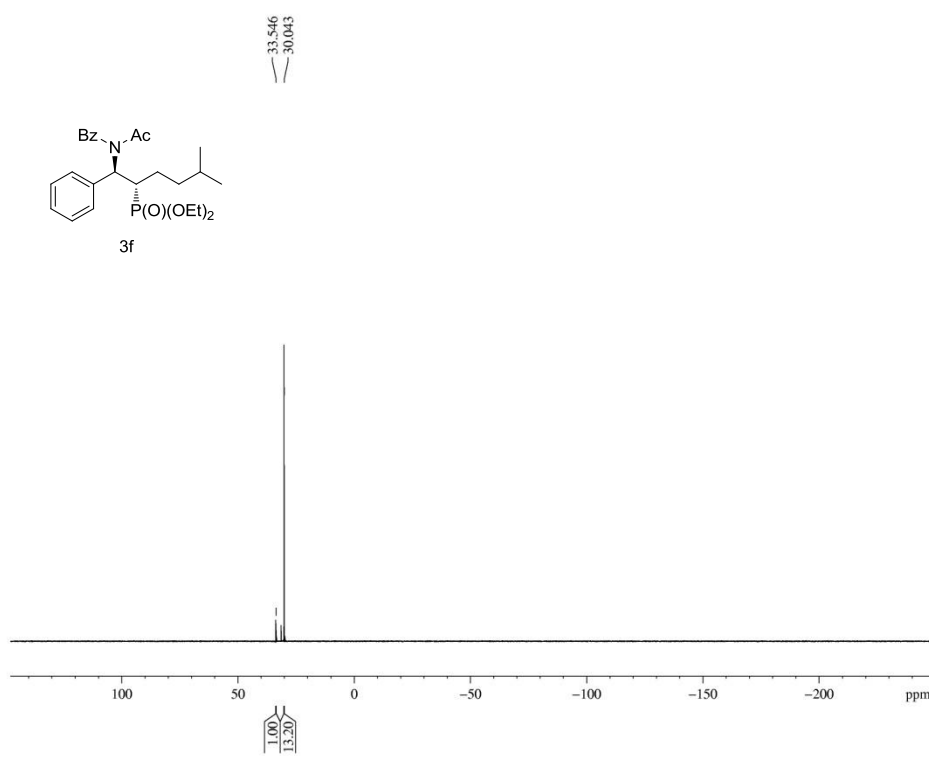

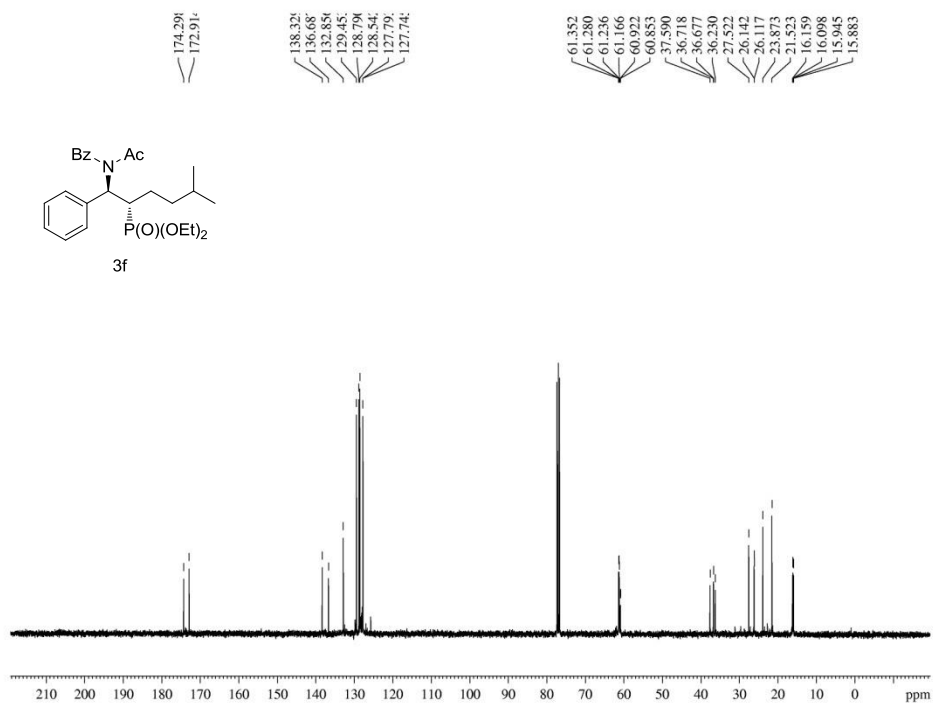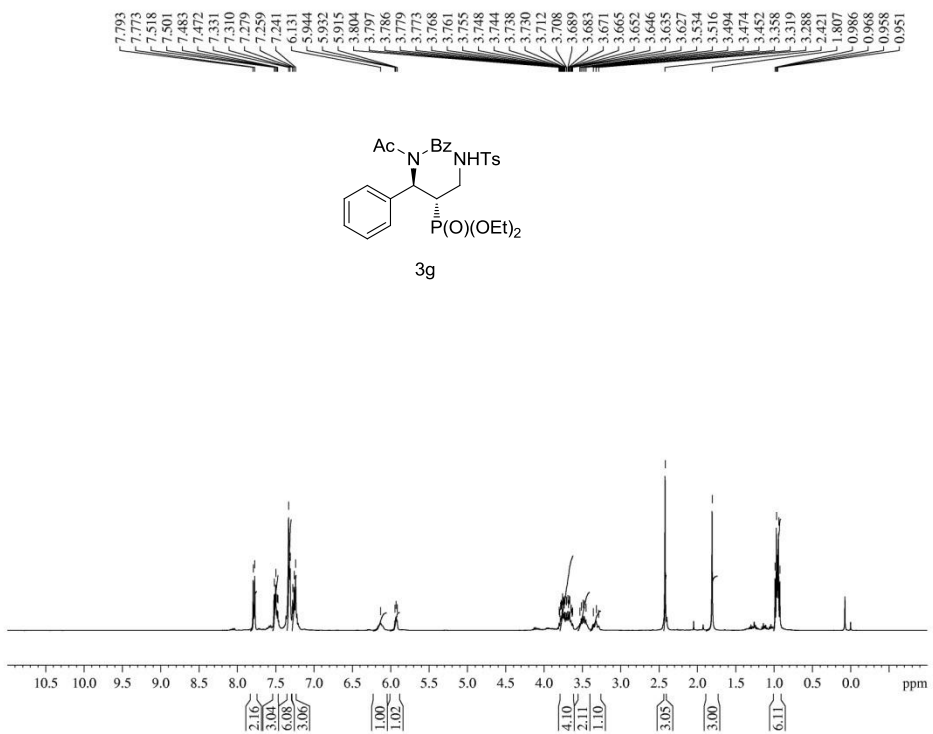

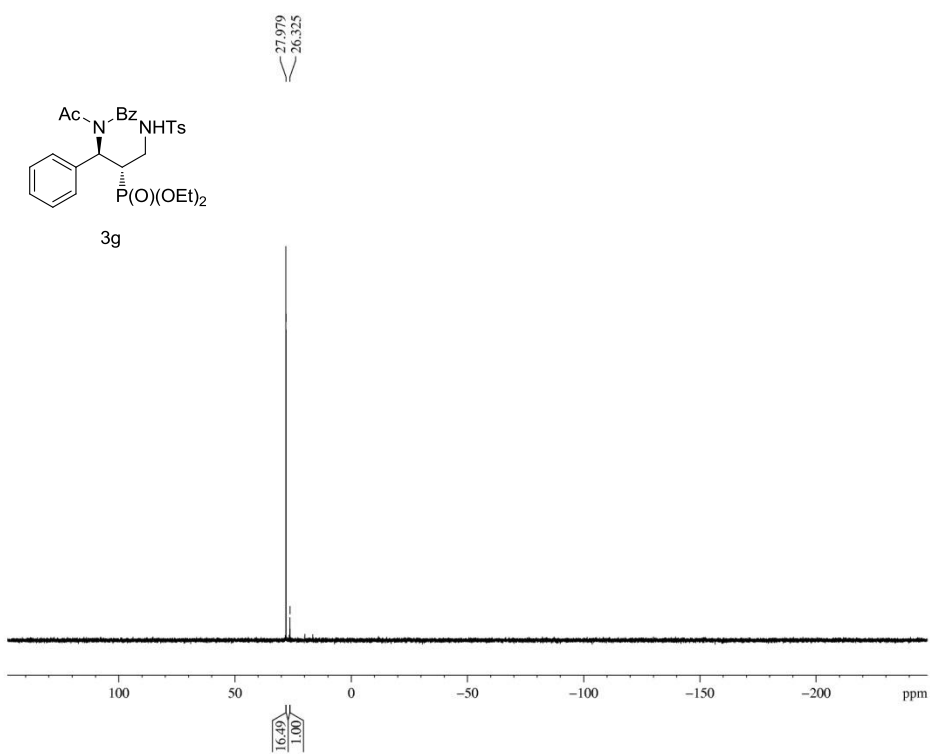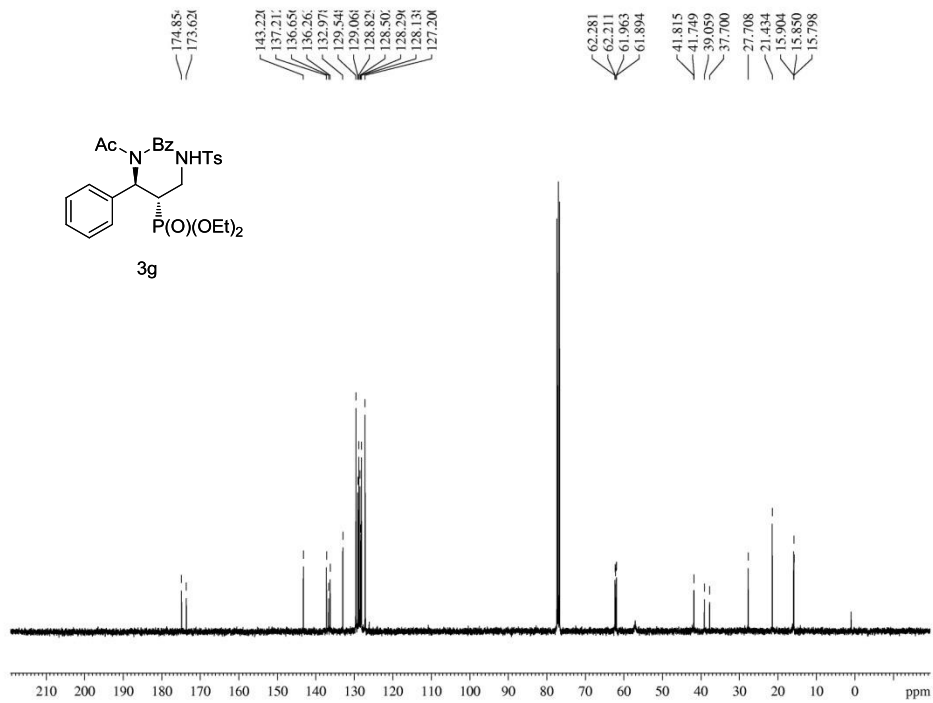

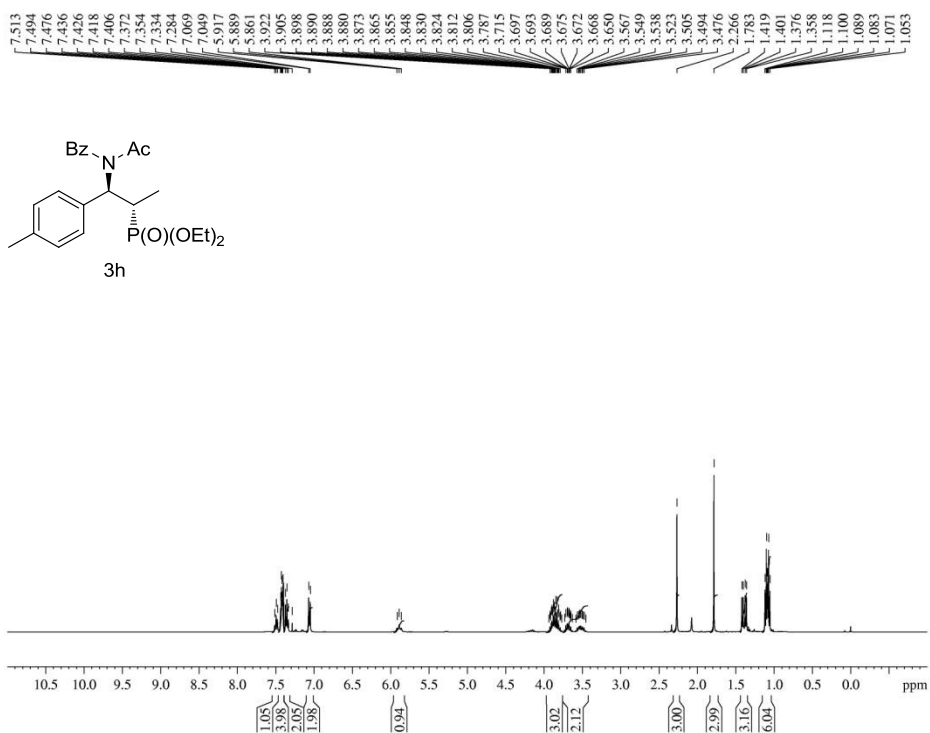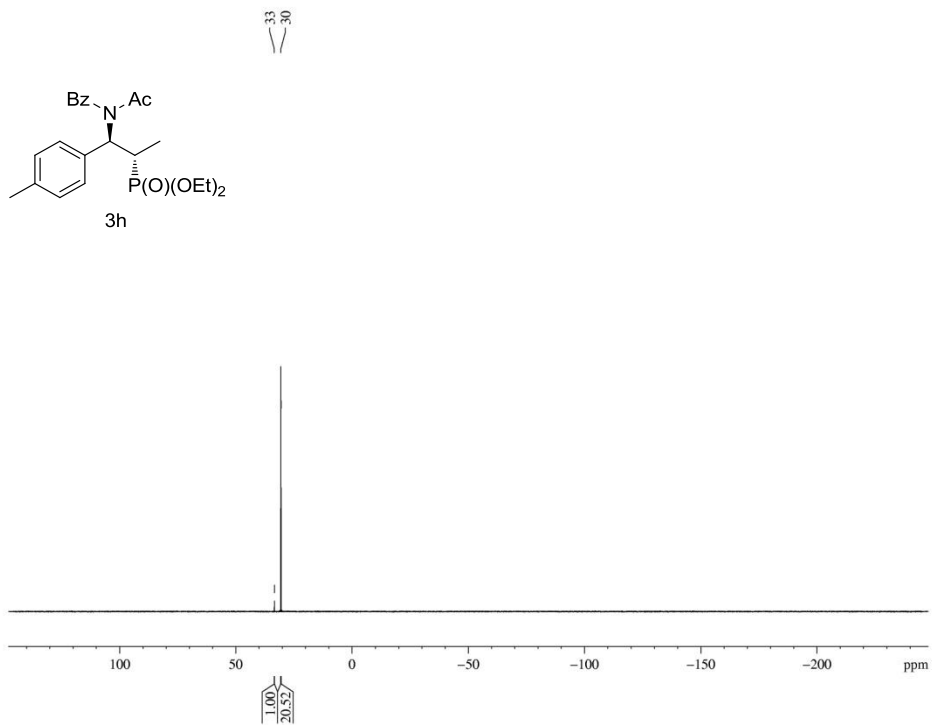



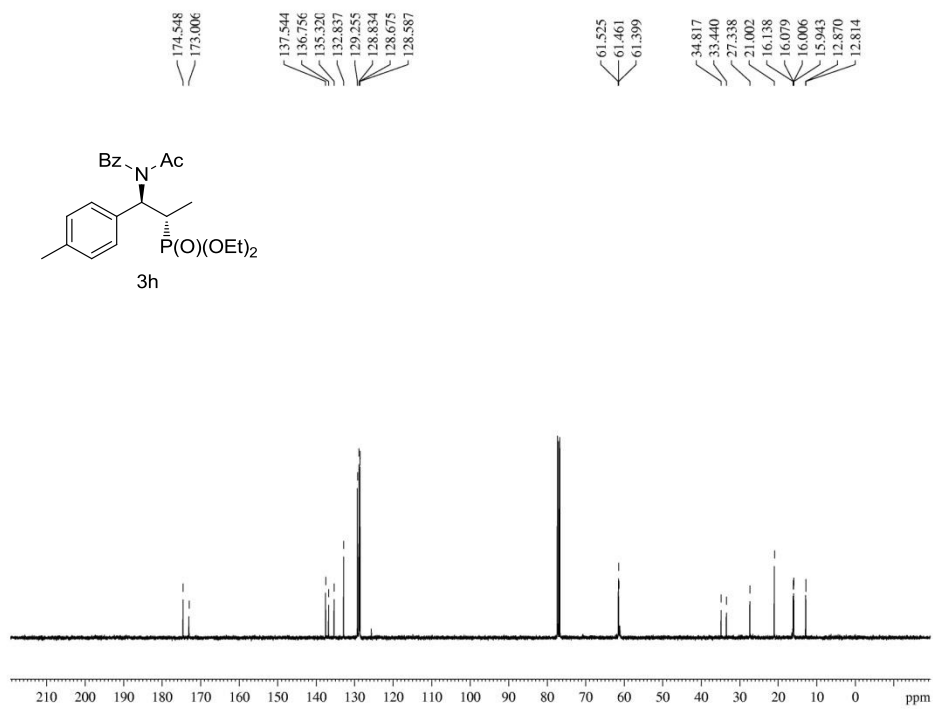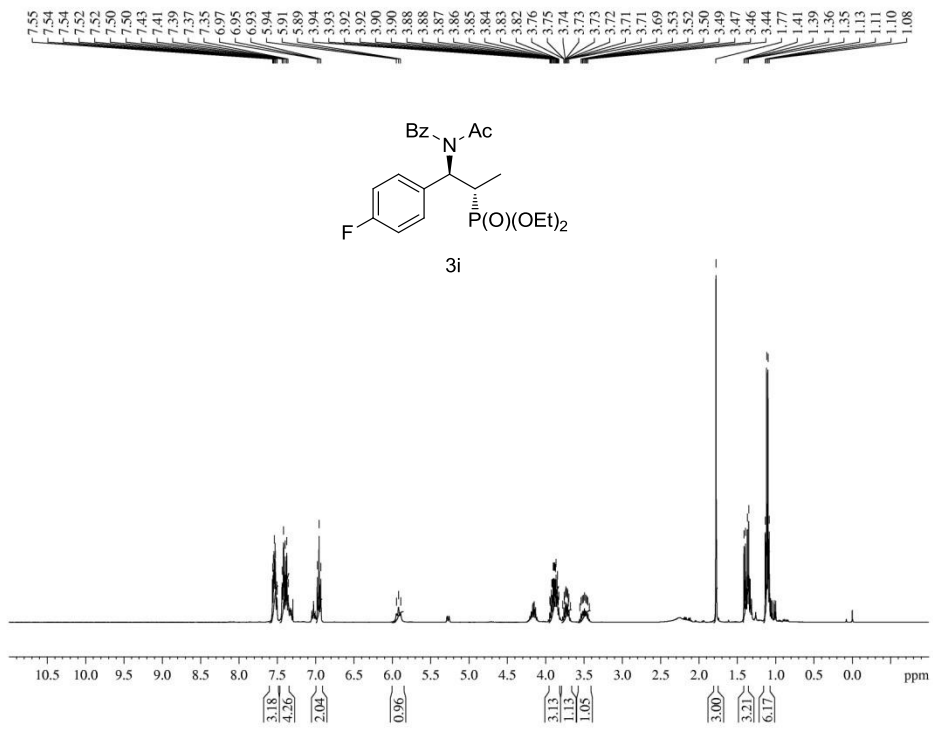

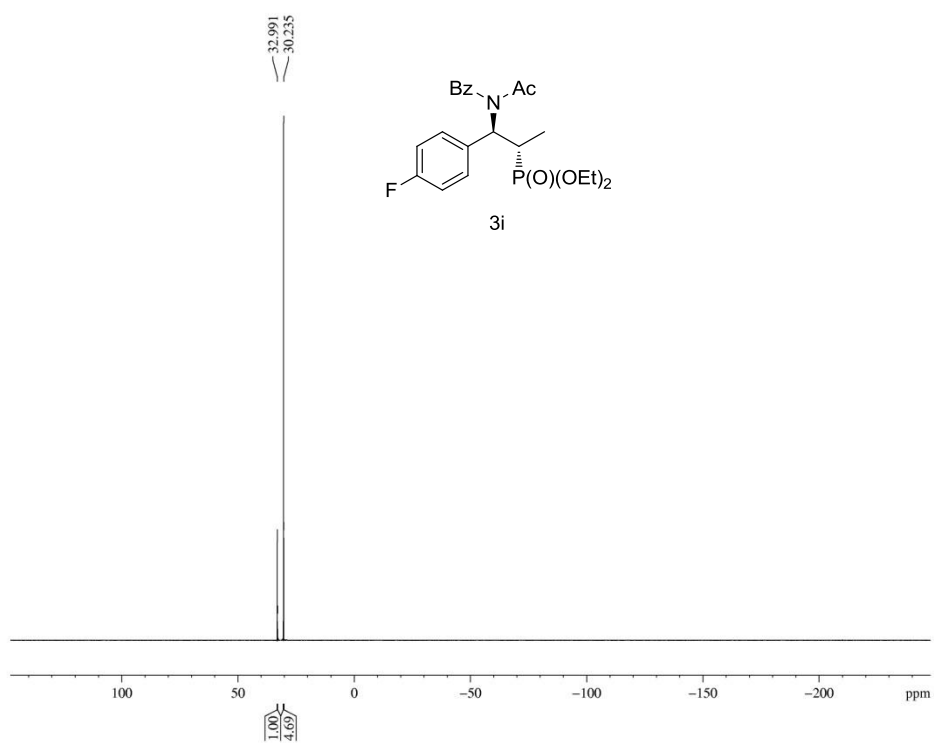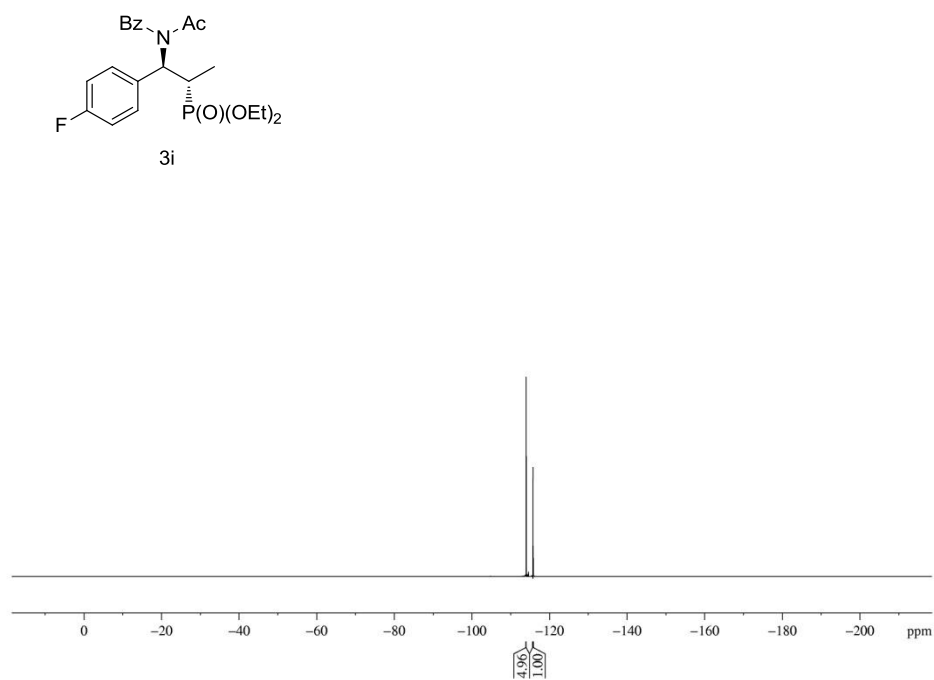

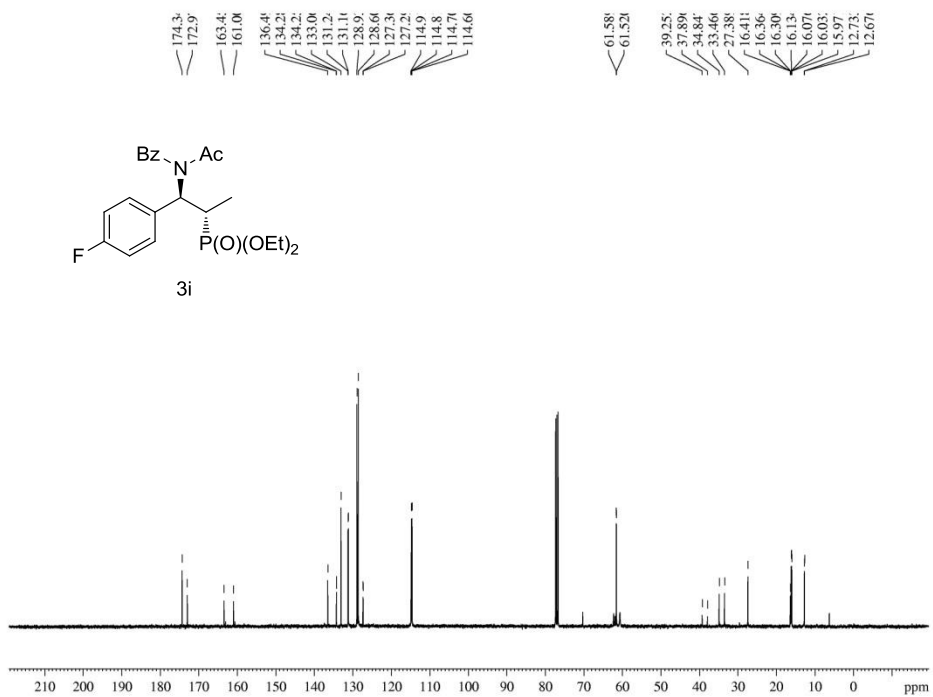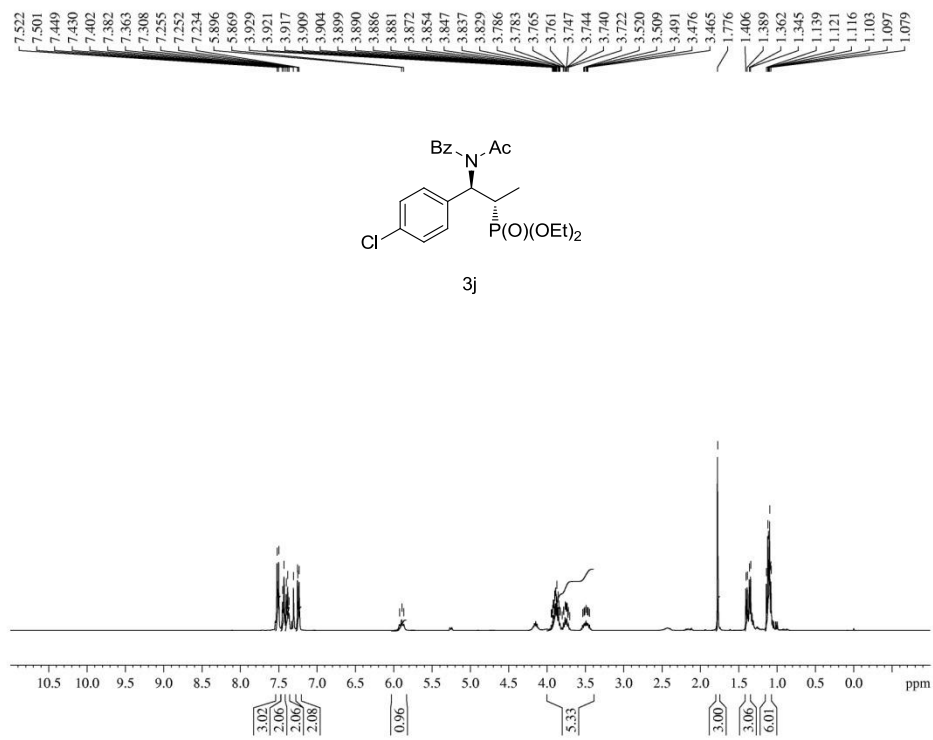

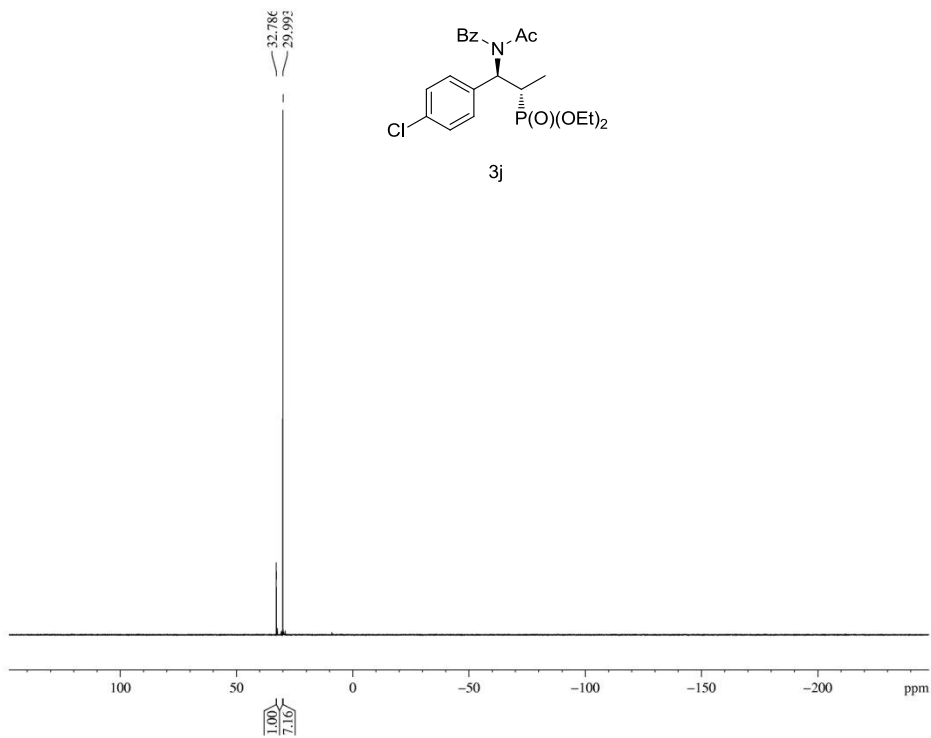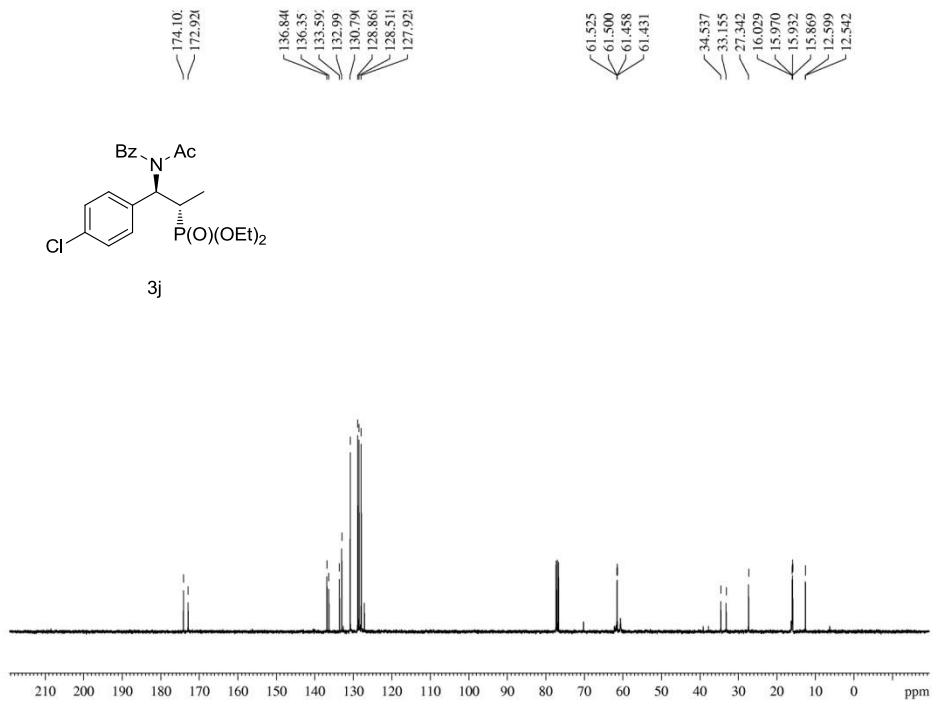

7.540  
7.524  
7.521  
7.507  
7.504  
7.465  
7.444  
7.430  
7.409  
7.406  
7.384  
7.363  
5.907  
5.879  
5.852  
3.984  
3.977  
3.959  
3.951  
3.941  
3.934  
3.916  
3.909  
3.898  
3.890  
3.884  
3.873  
3.866  
3.846  
3.841  
3.824  
3.808  
3.806  
3.787  
3.784  
3.769  
3.766  
3.763  
3.744  
3.726  
3.726  
3.547  
3.529  
3.518  
3.501  
3.485  
3.474  
3.456  
3.439  
1.776  
1.410  
1.392  
1.367  
1.349  
1.146

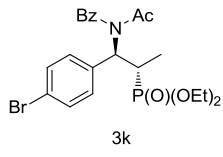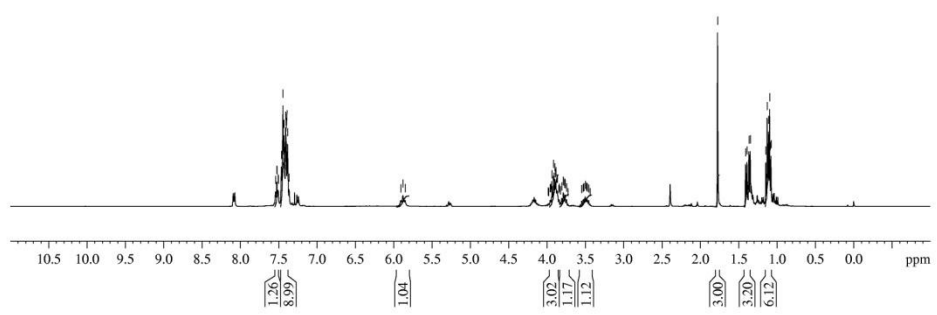

32.857  
30.055

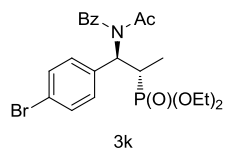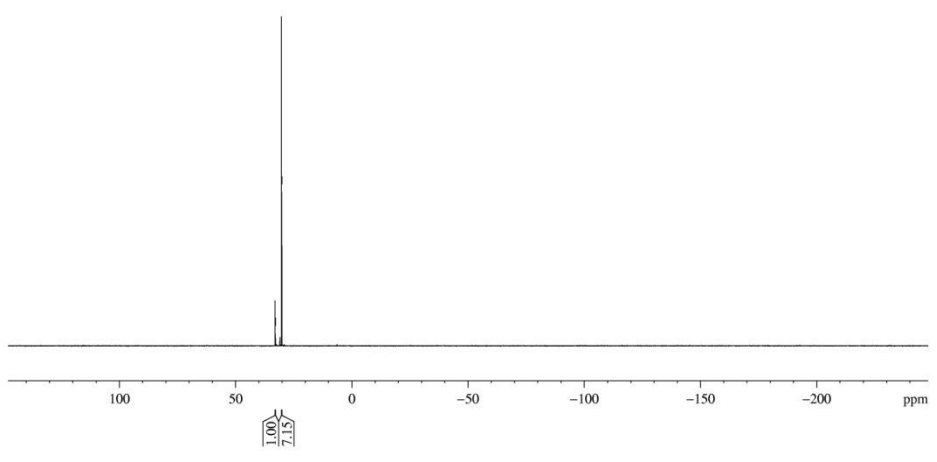

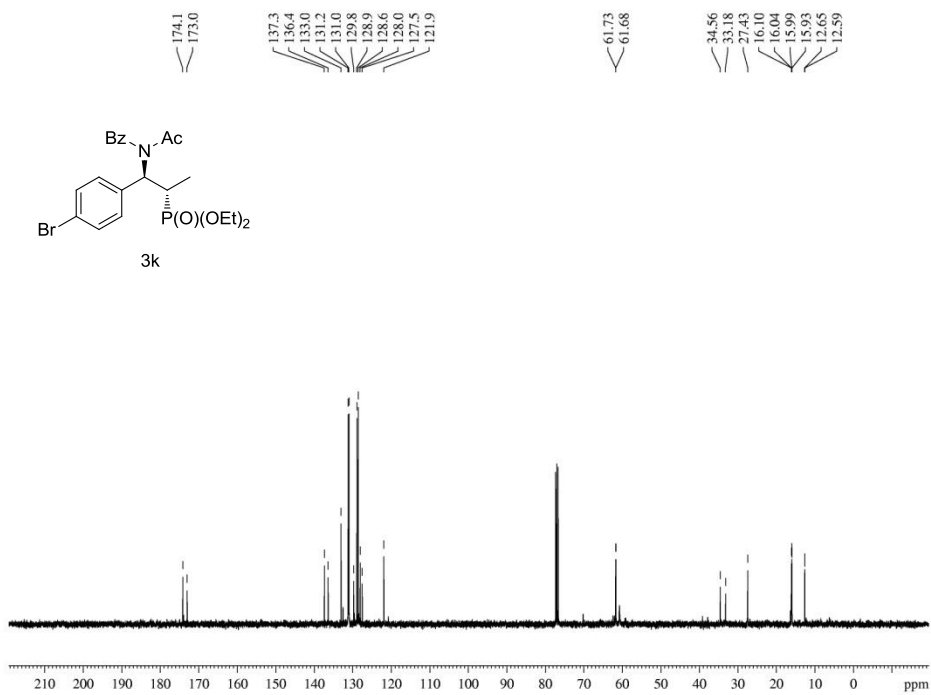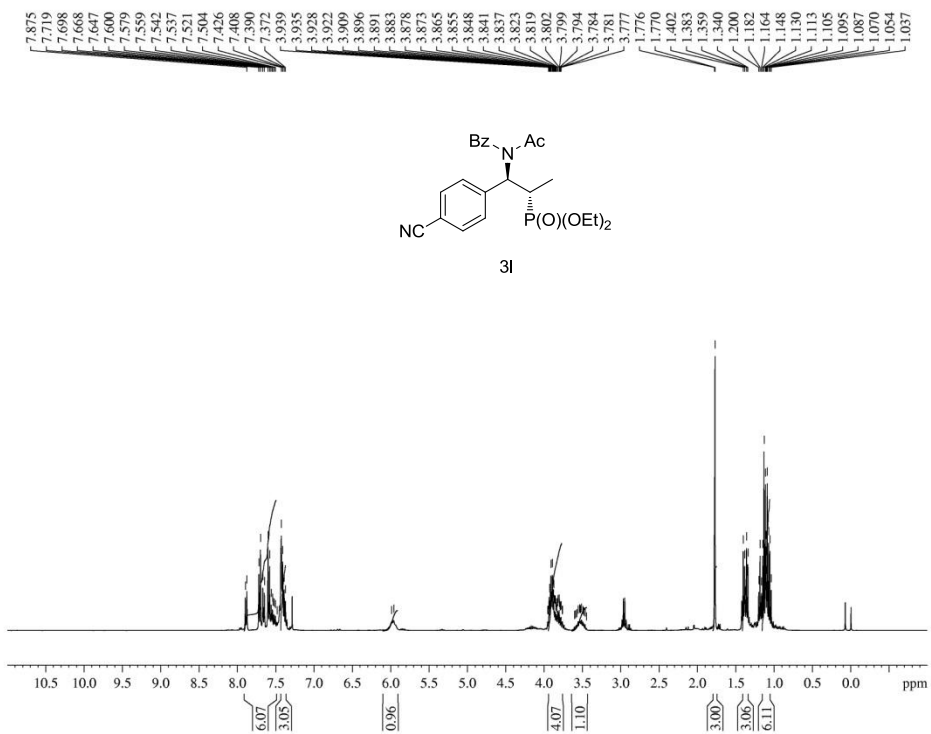

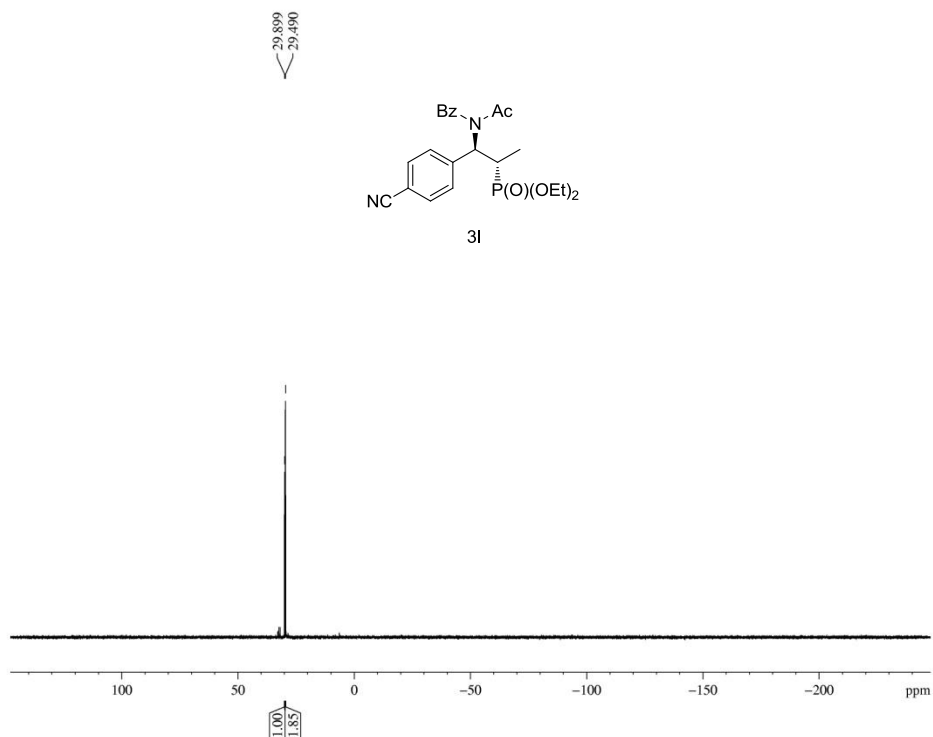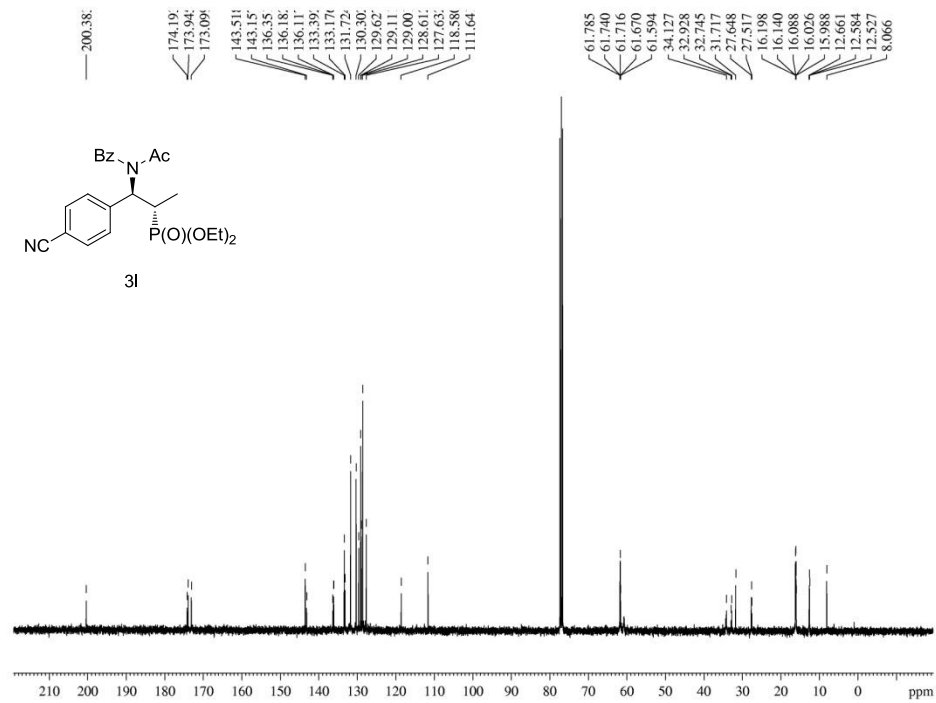

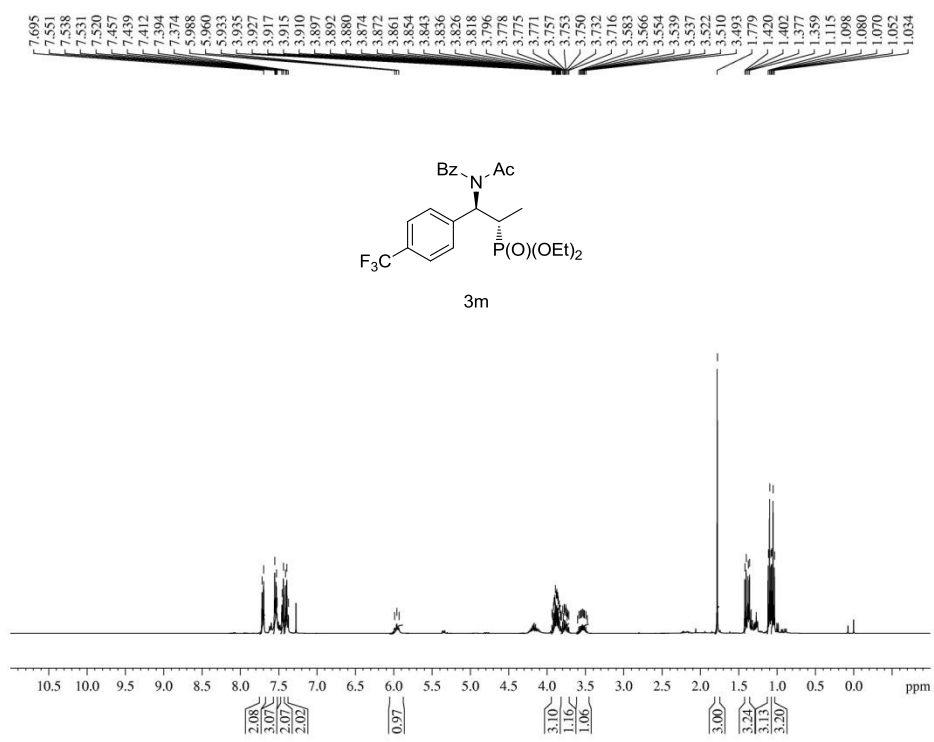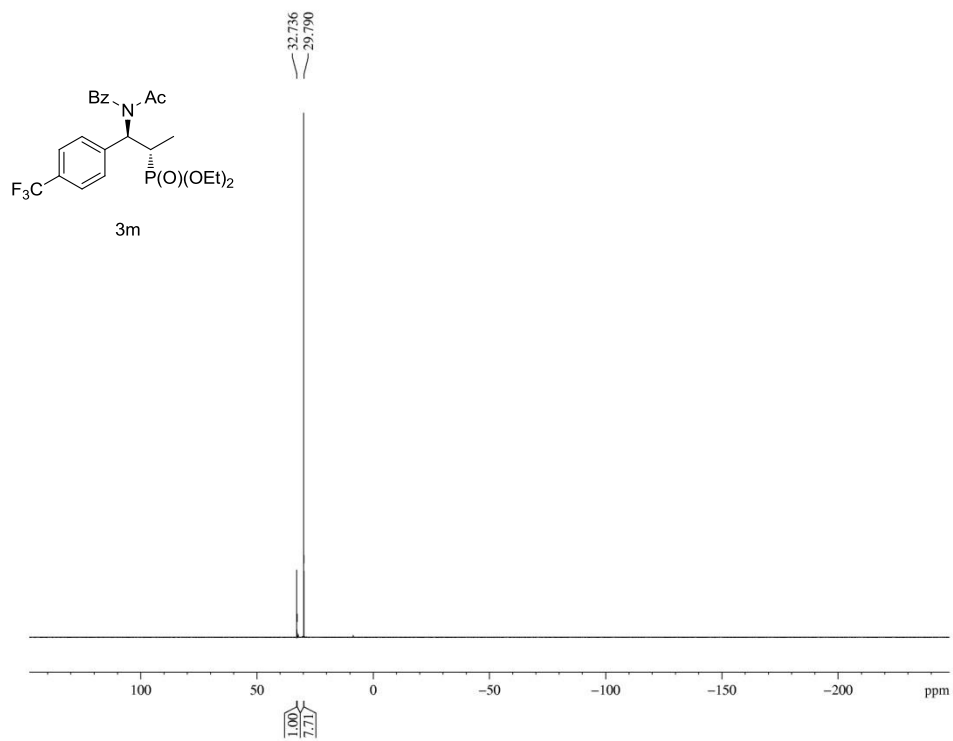



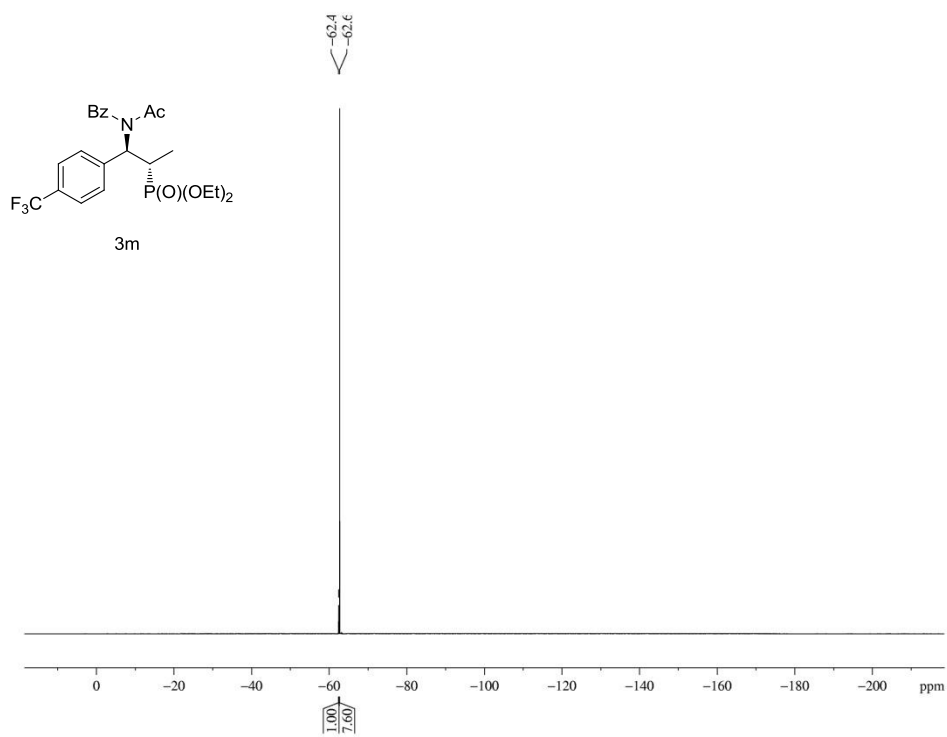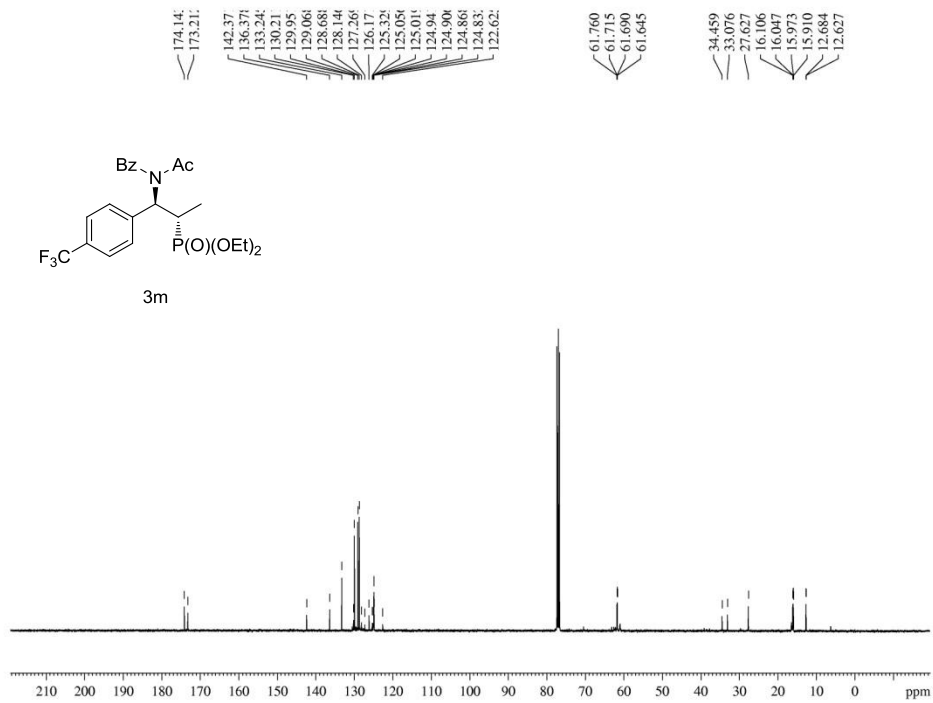

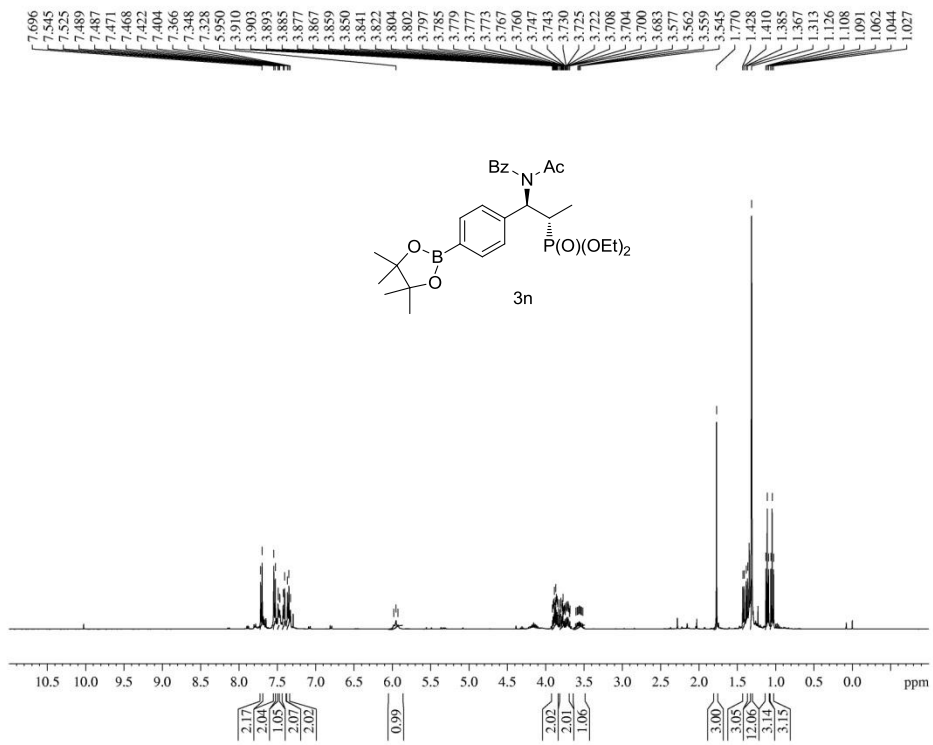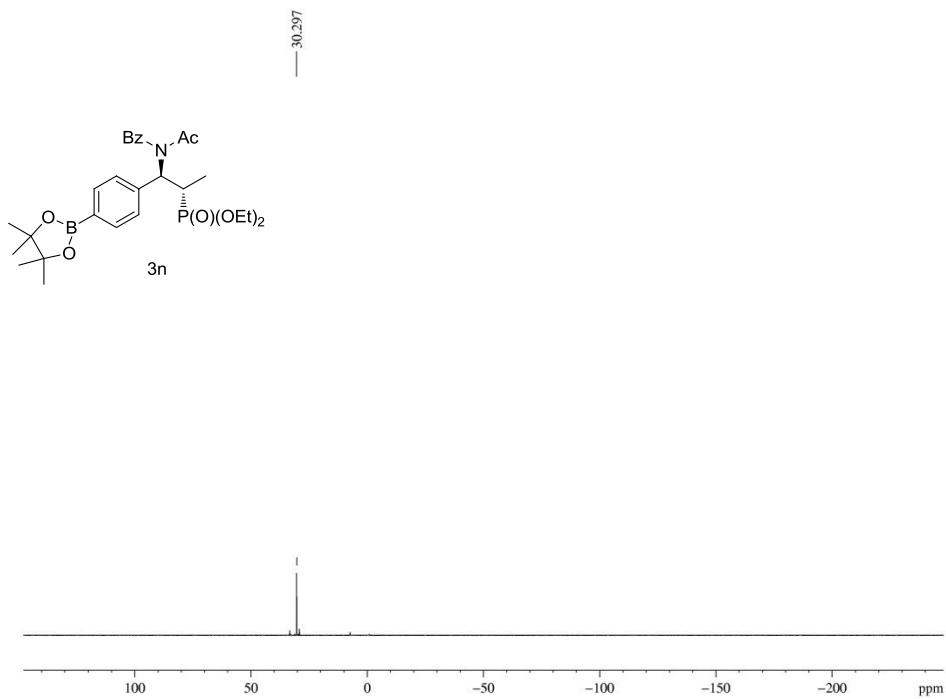

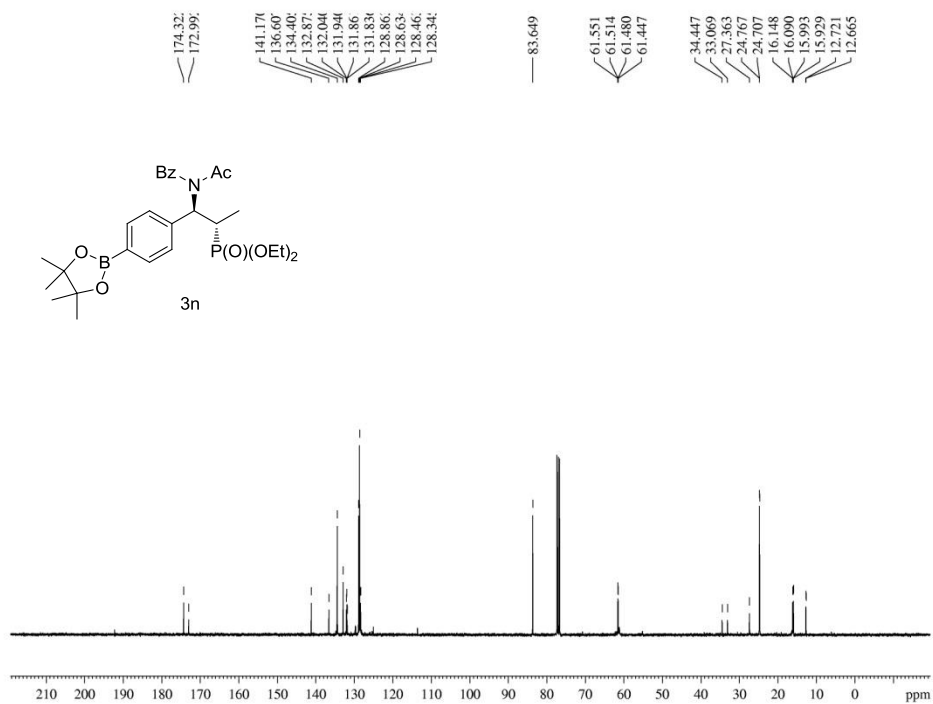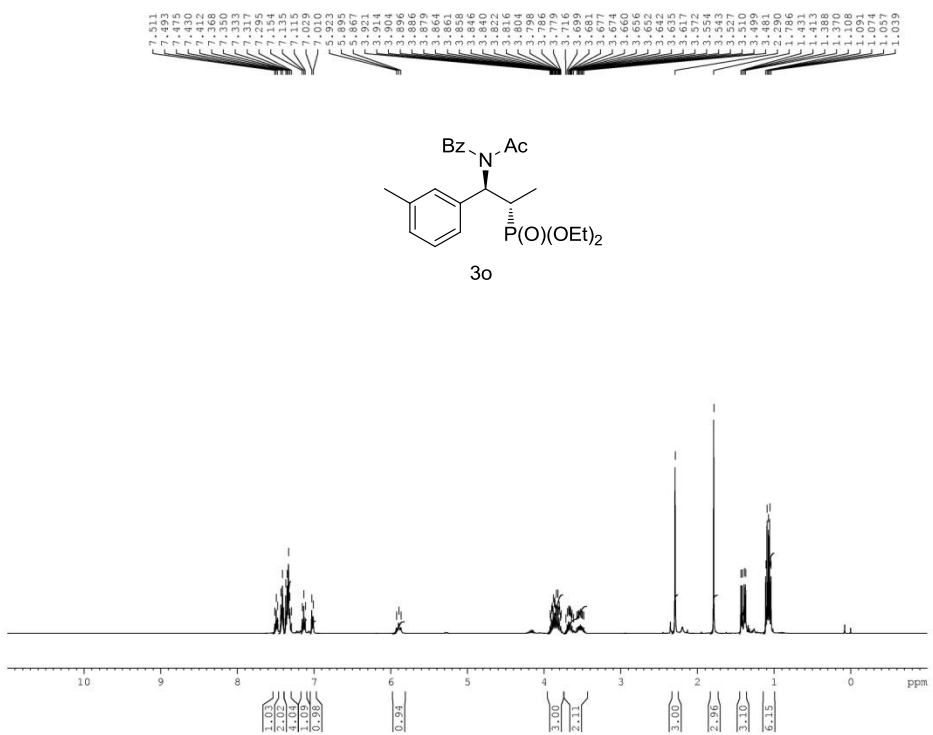

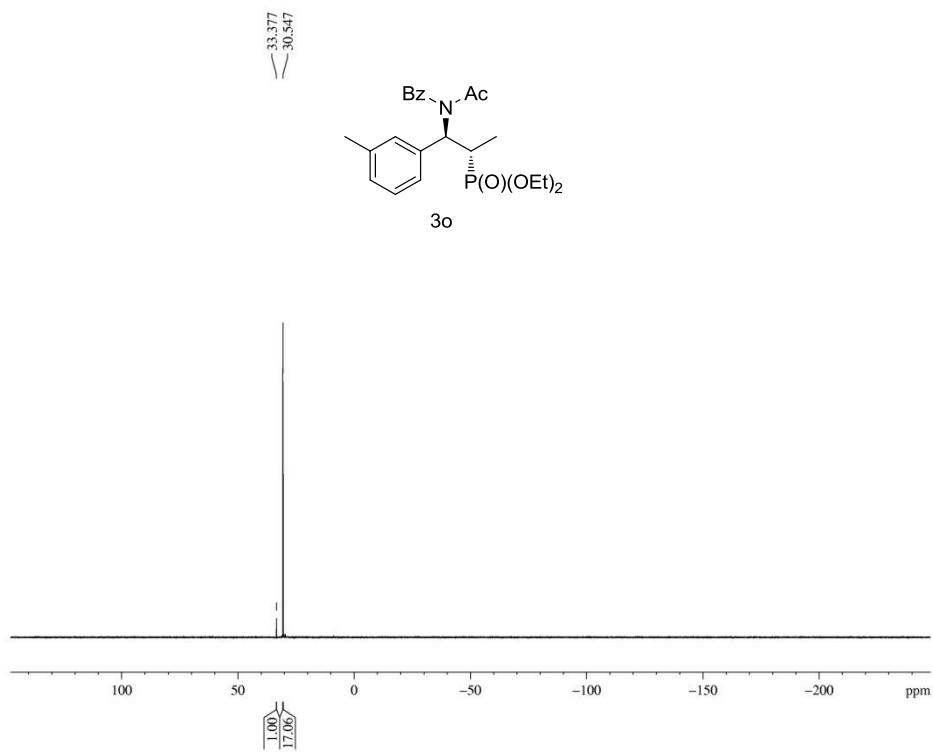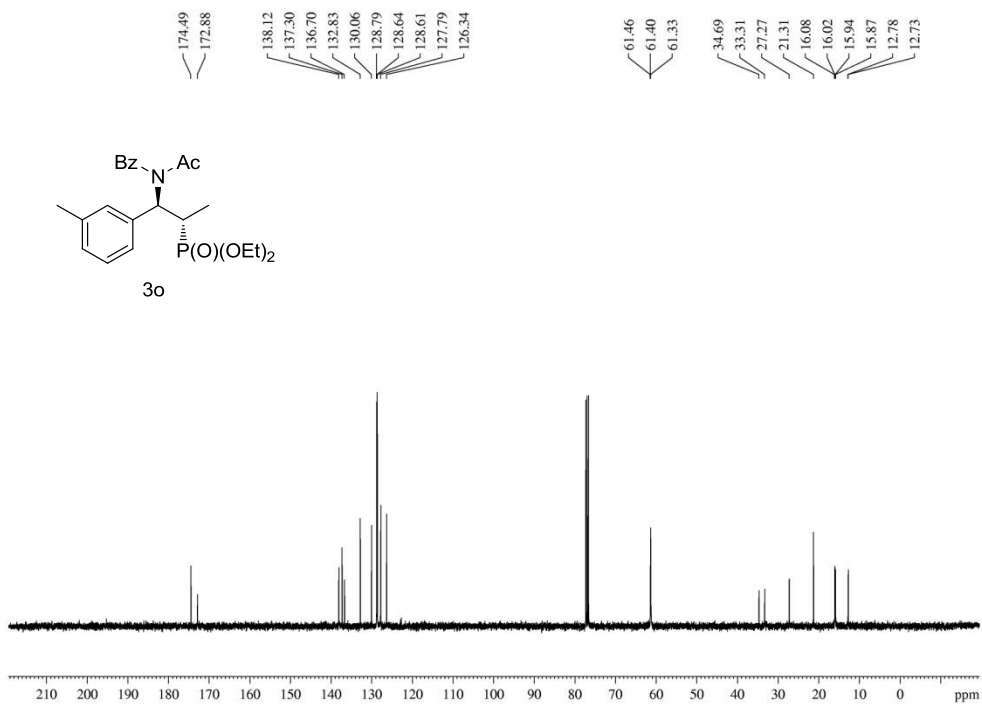

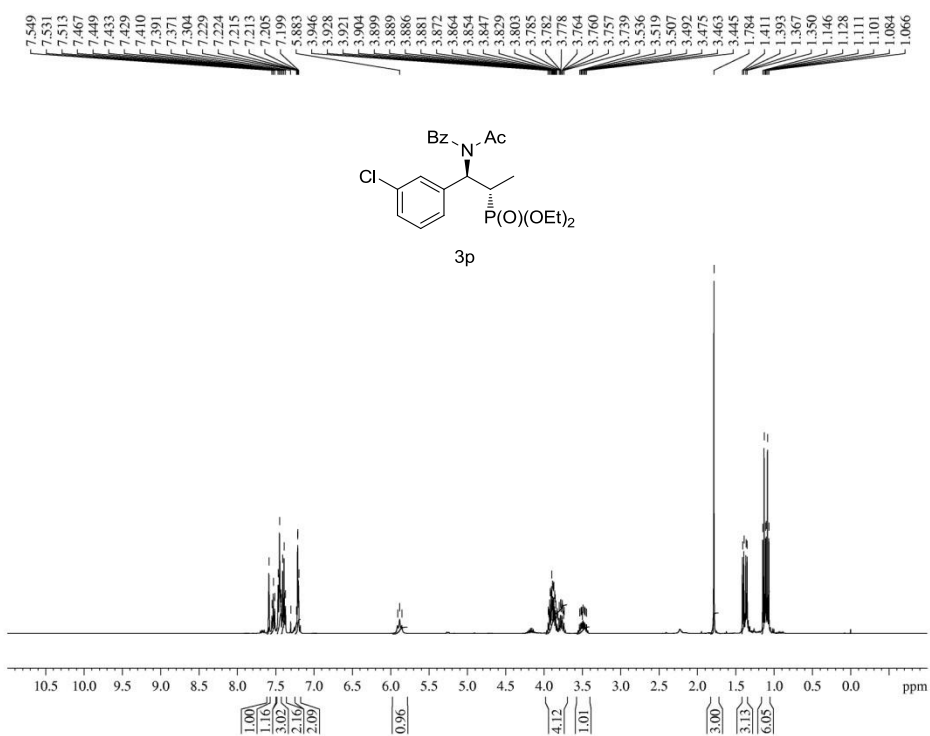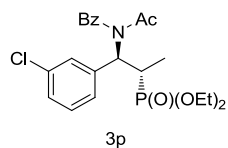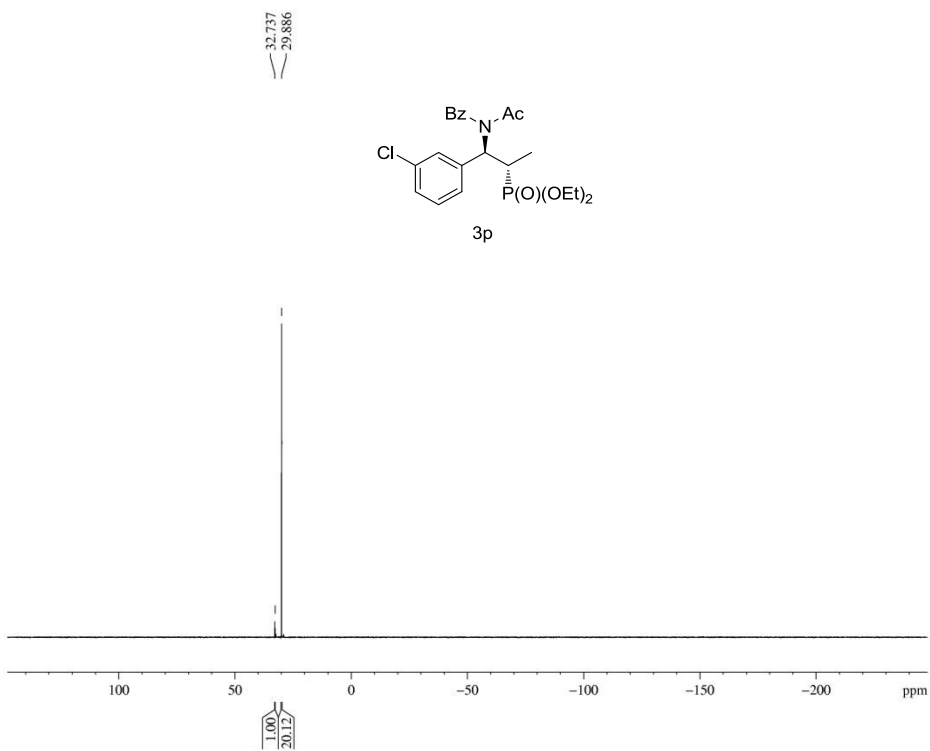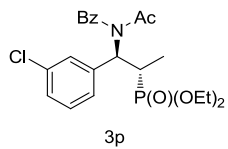

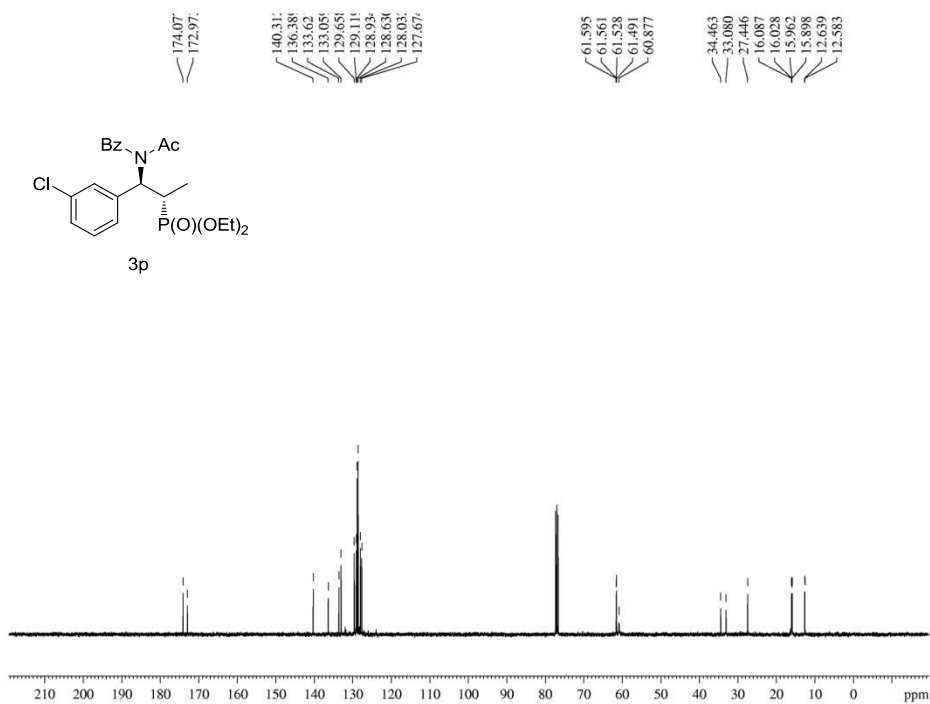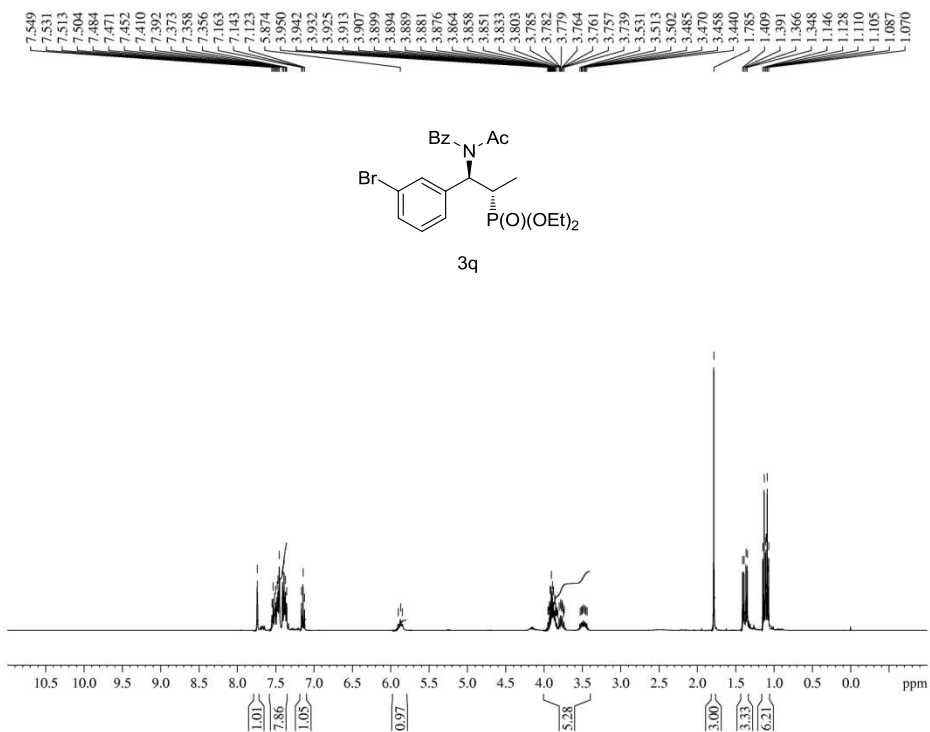

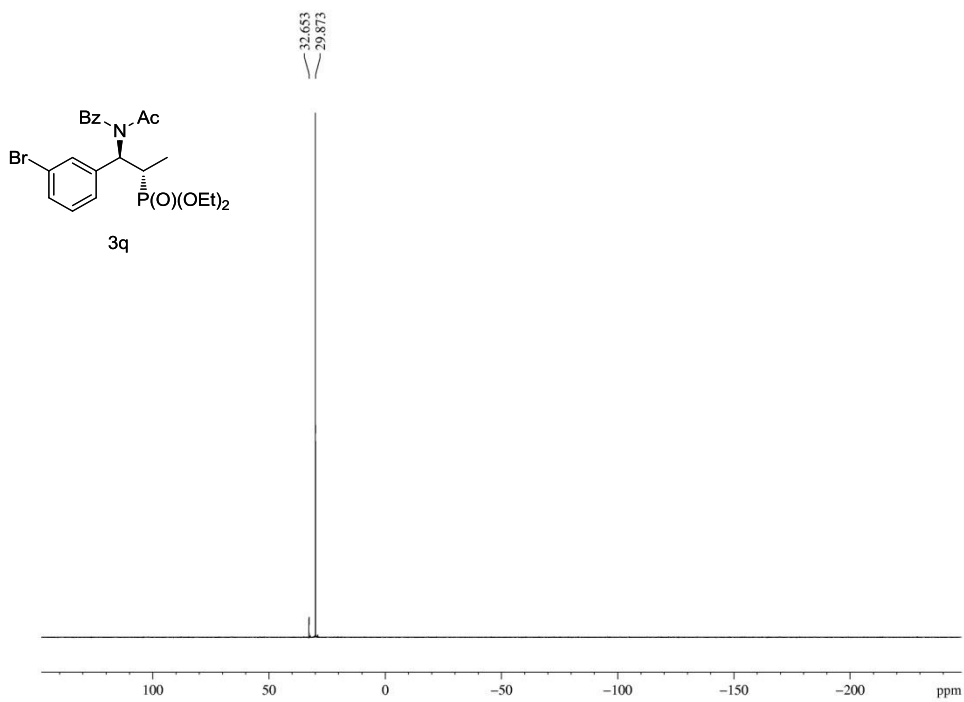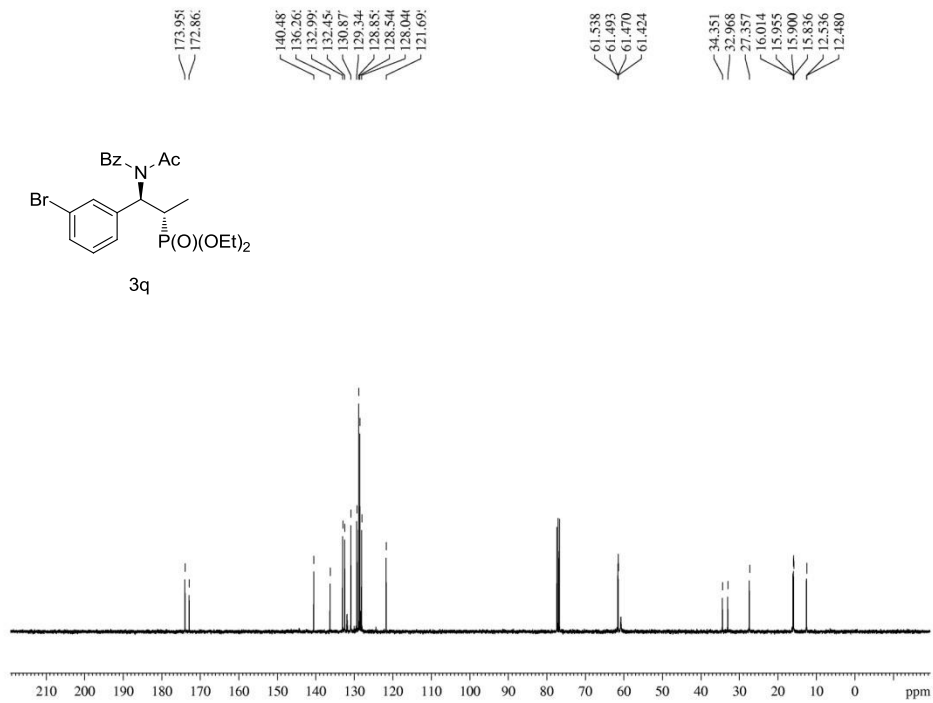

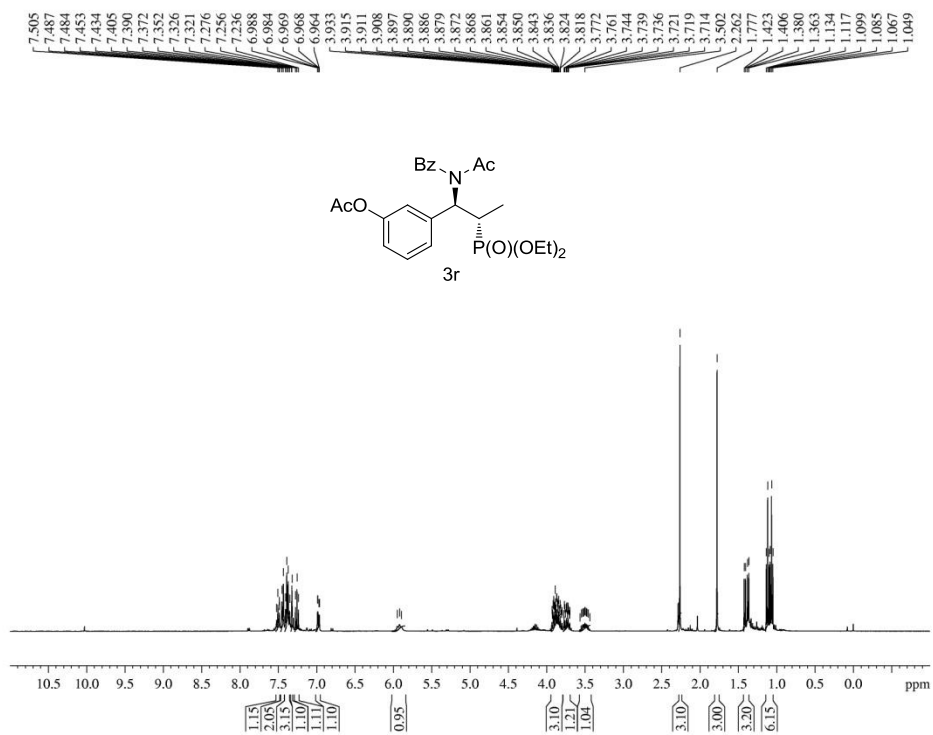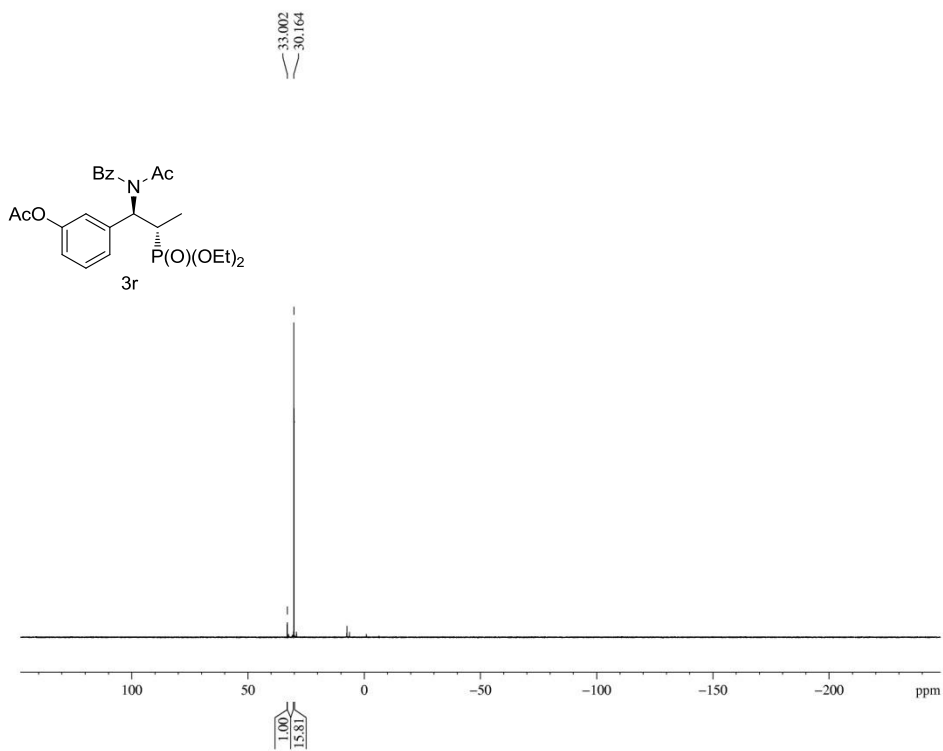



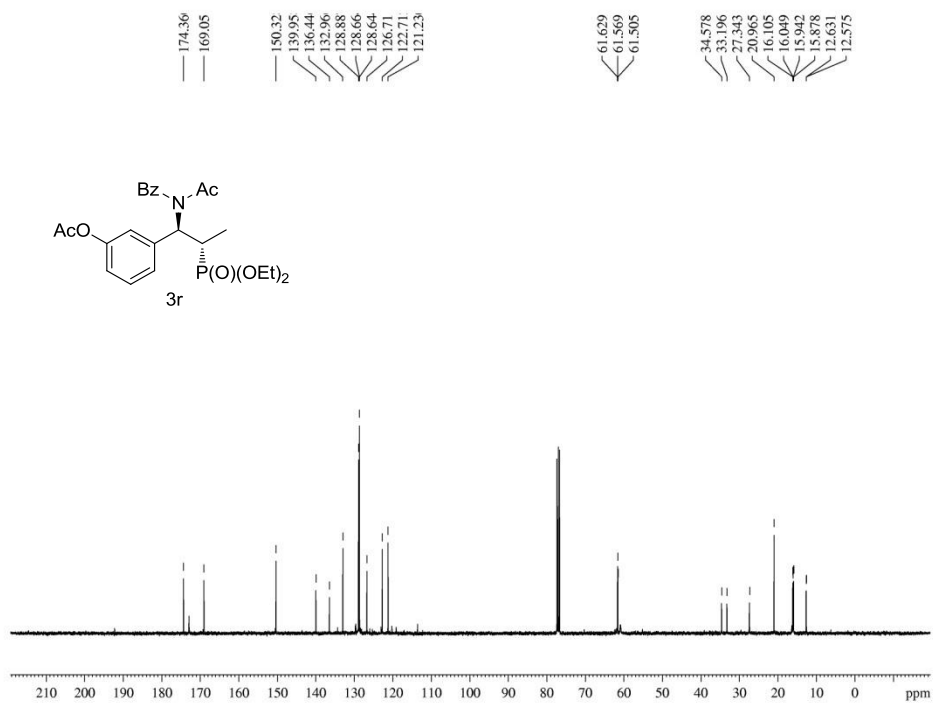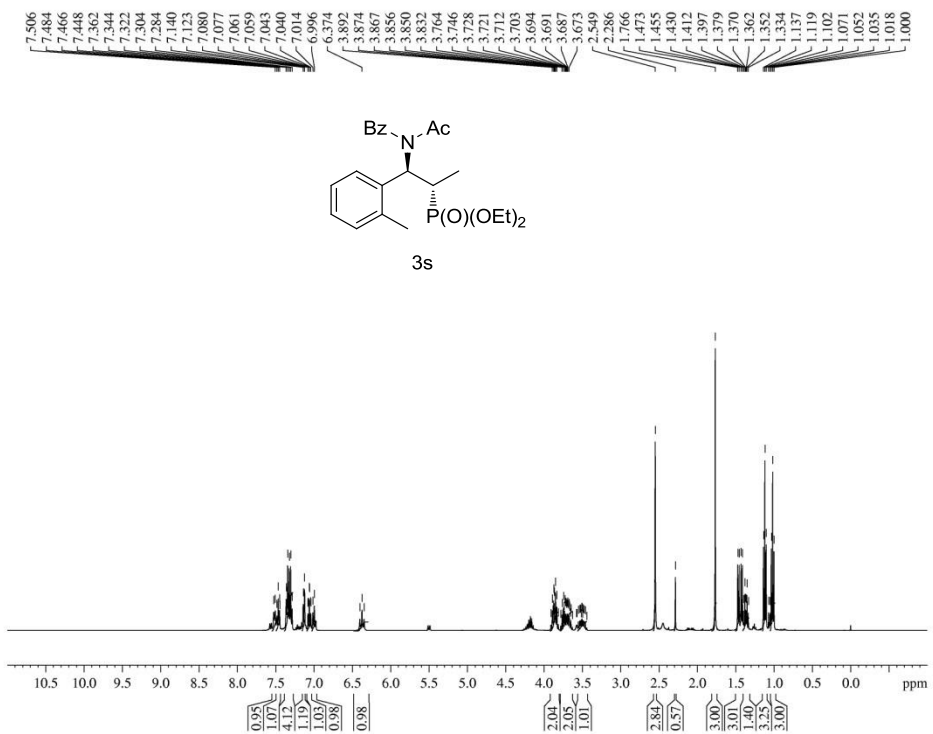

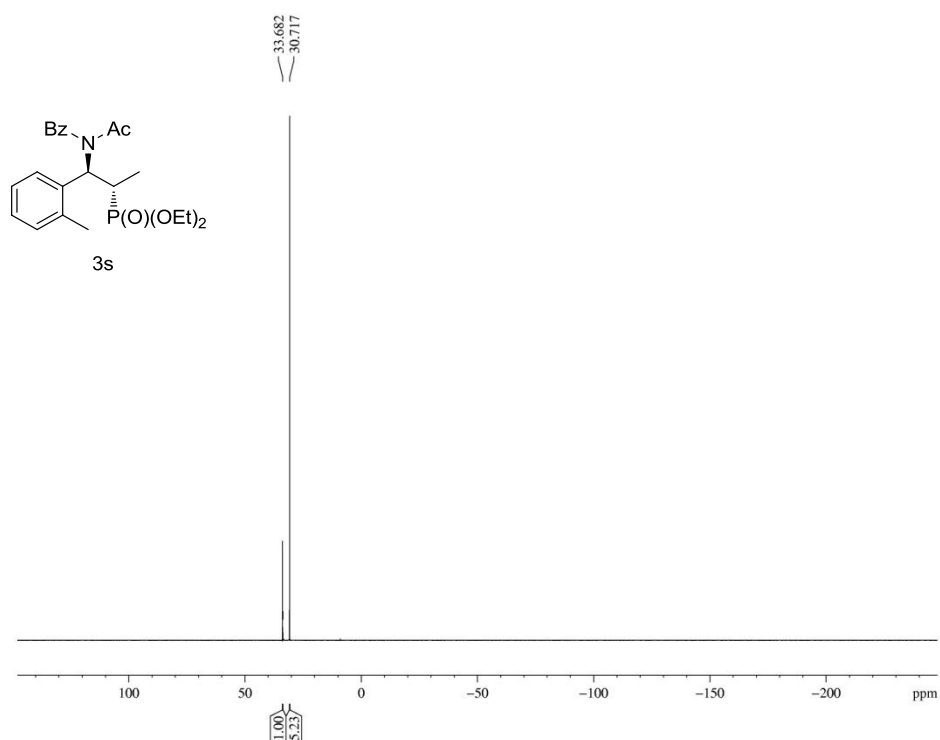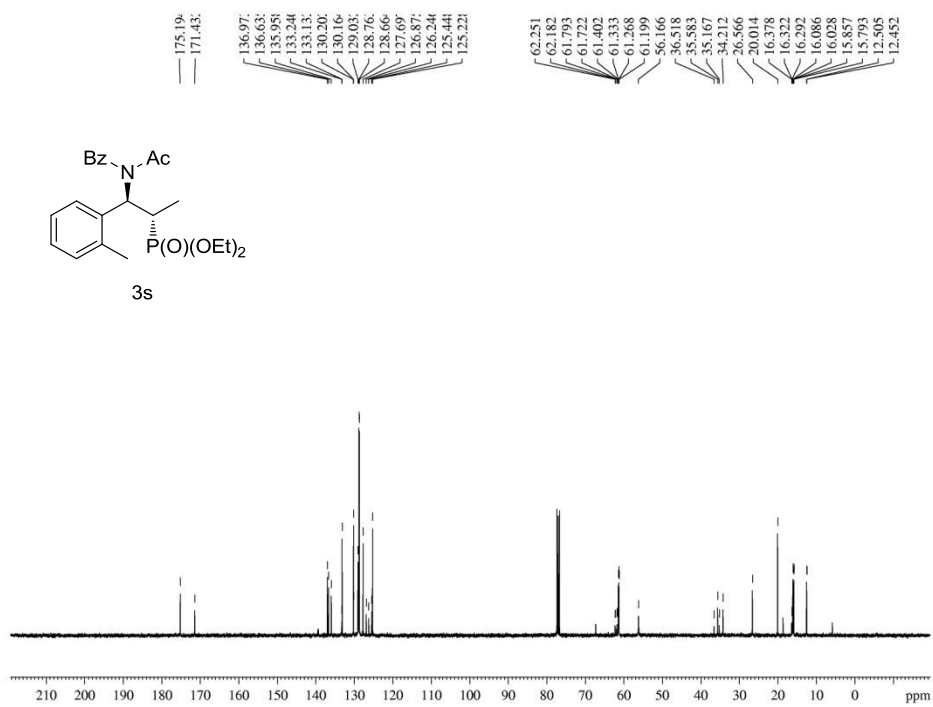

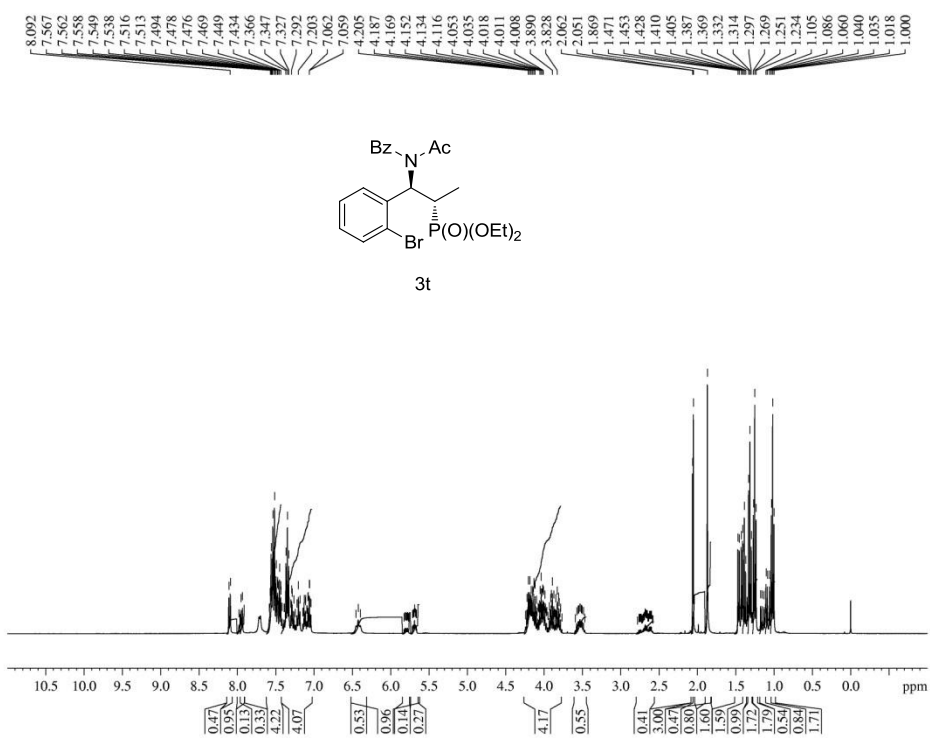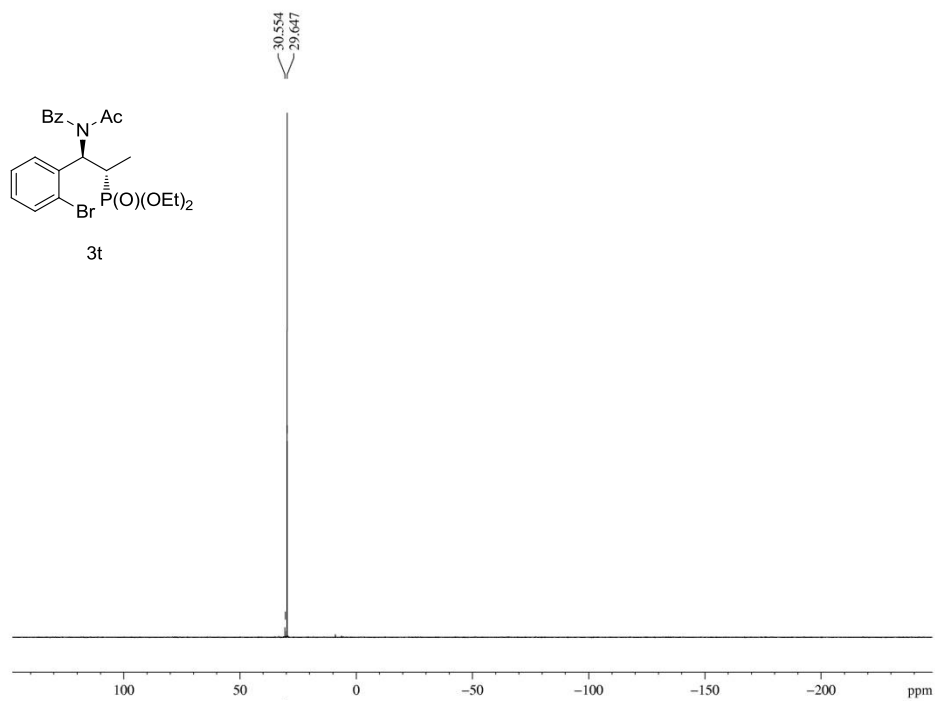

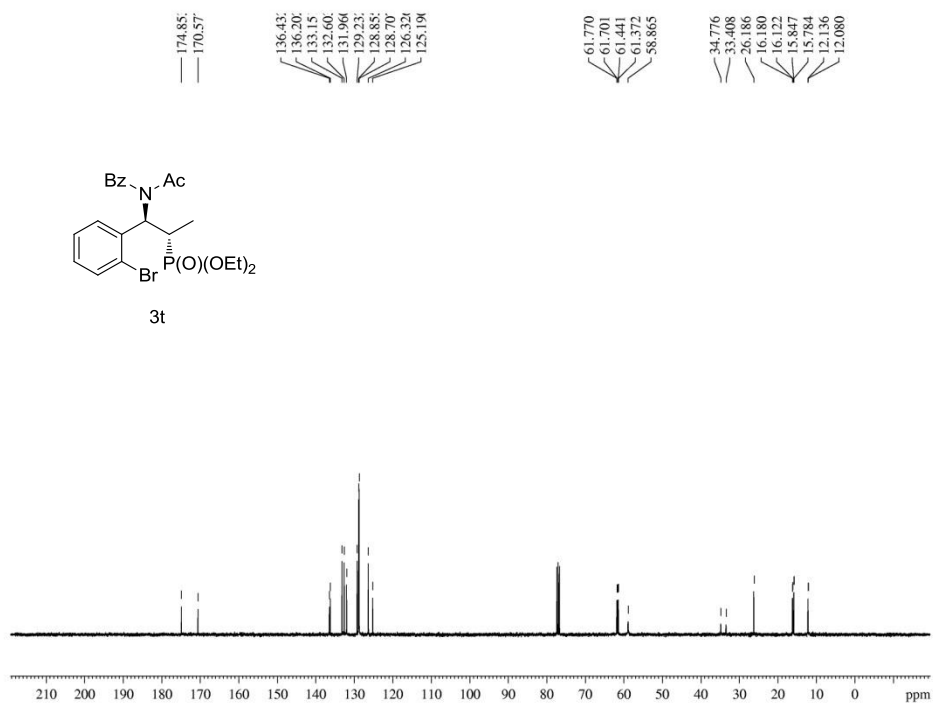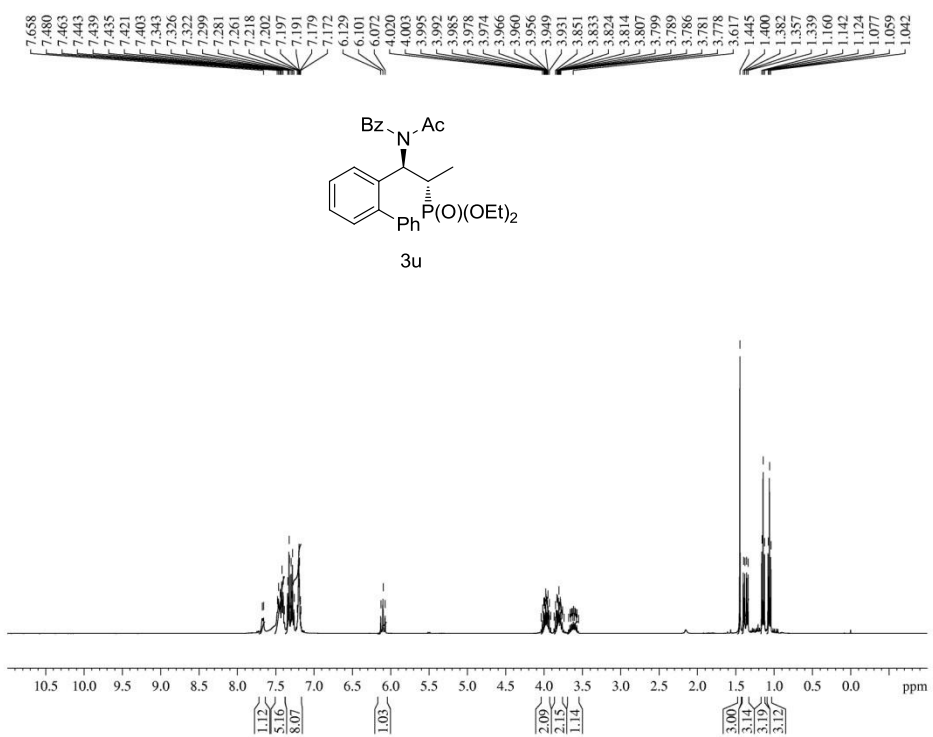

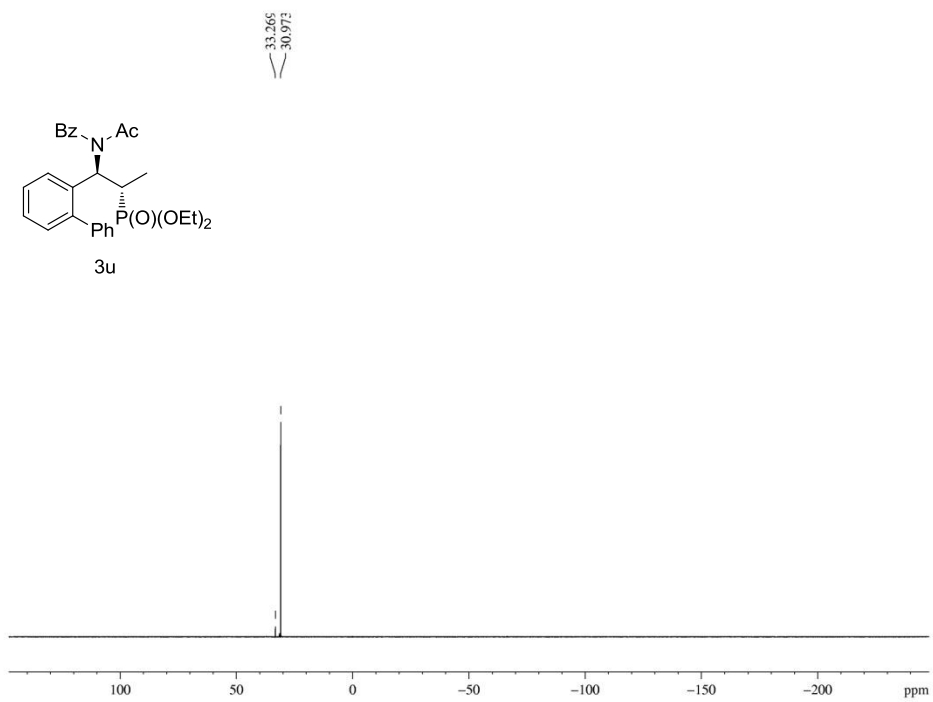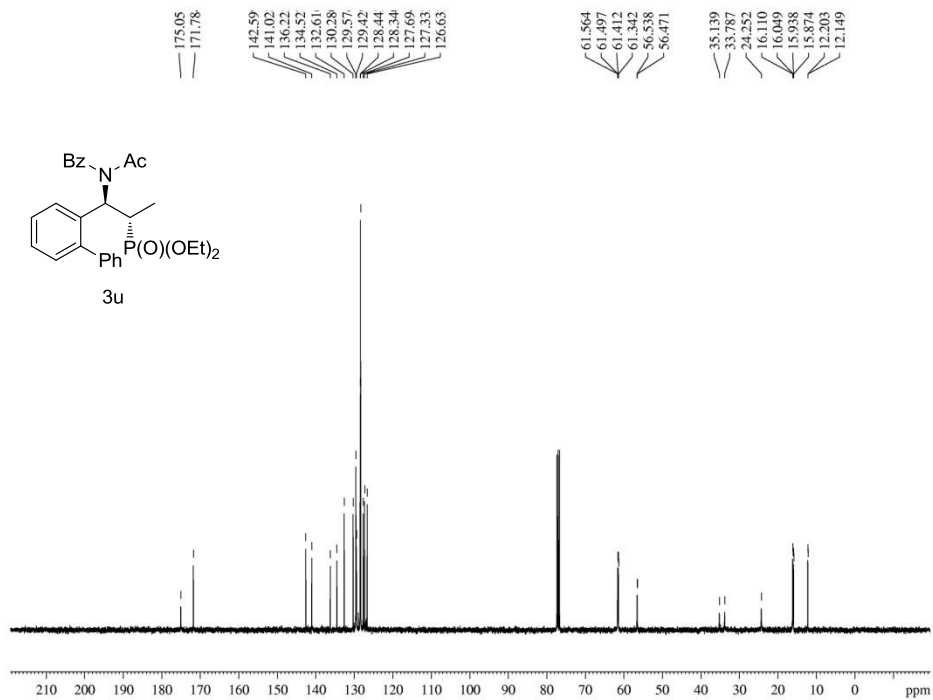

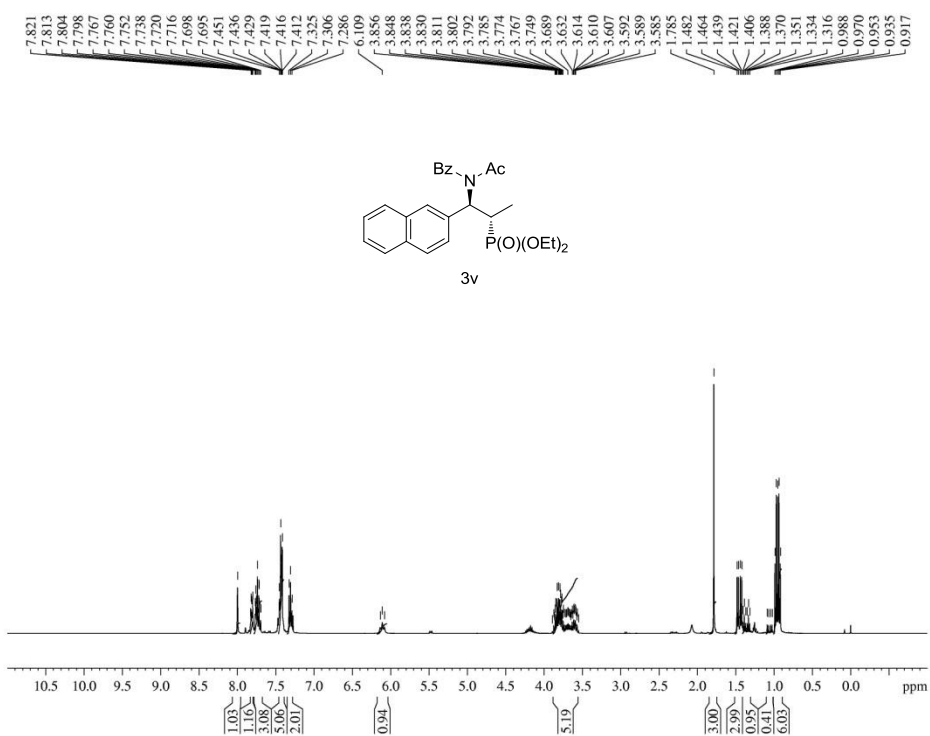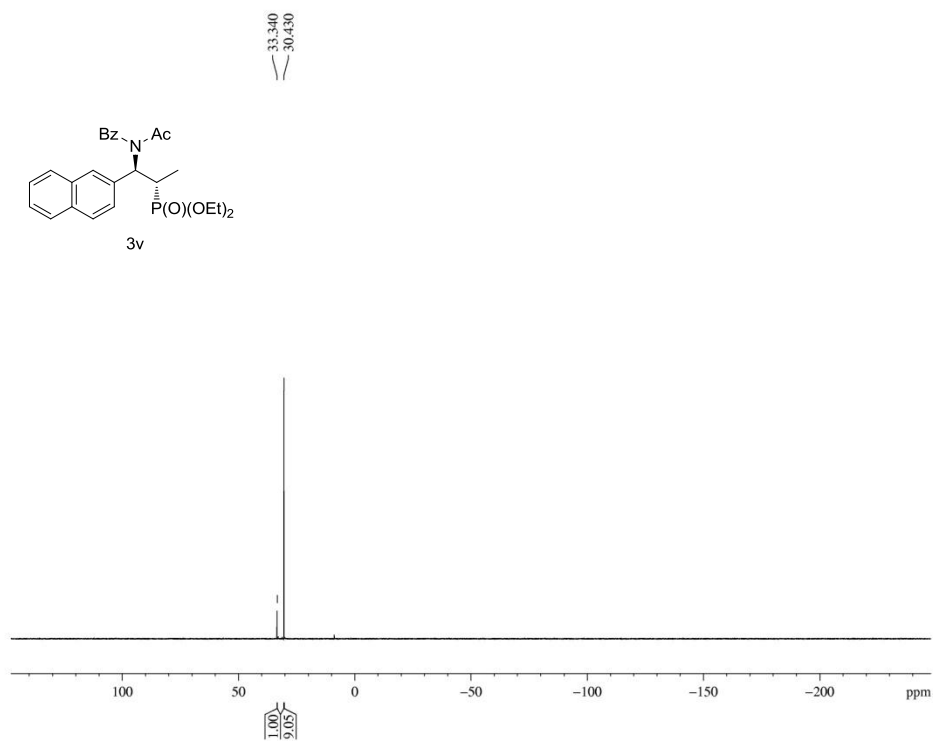

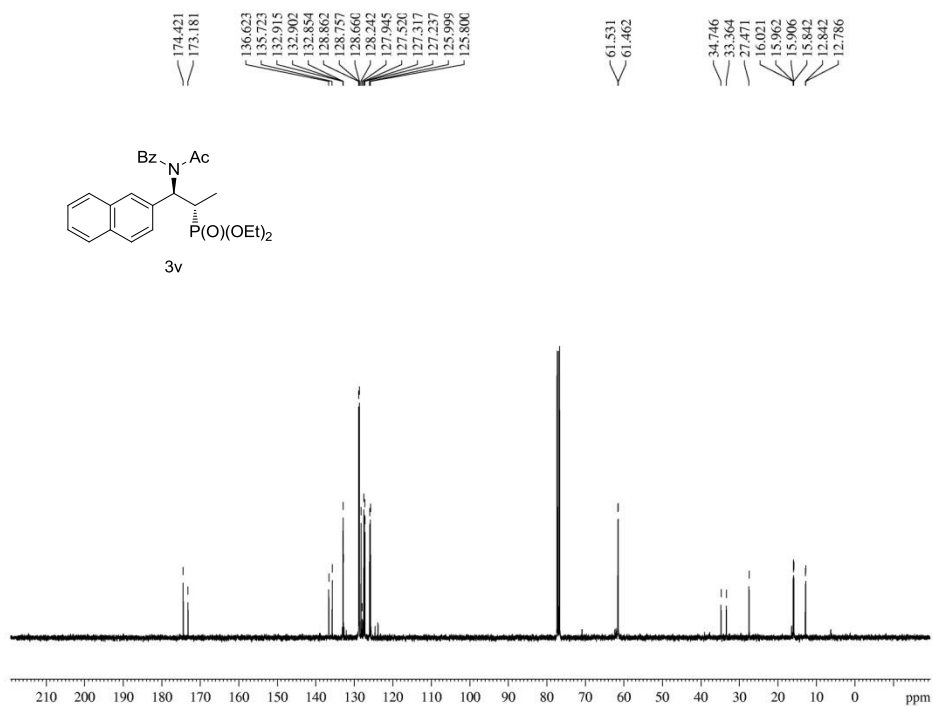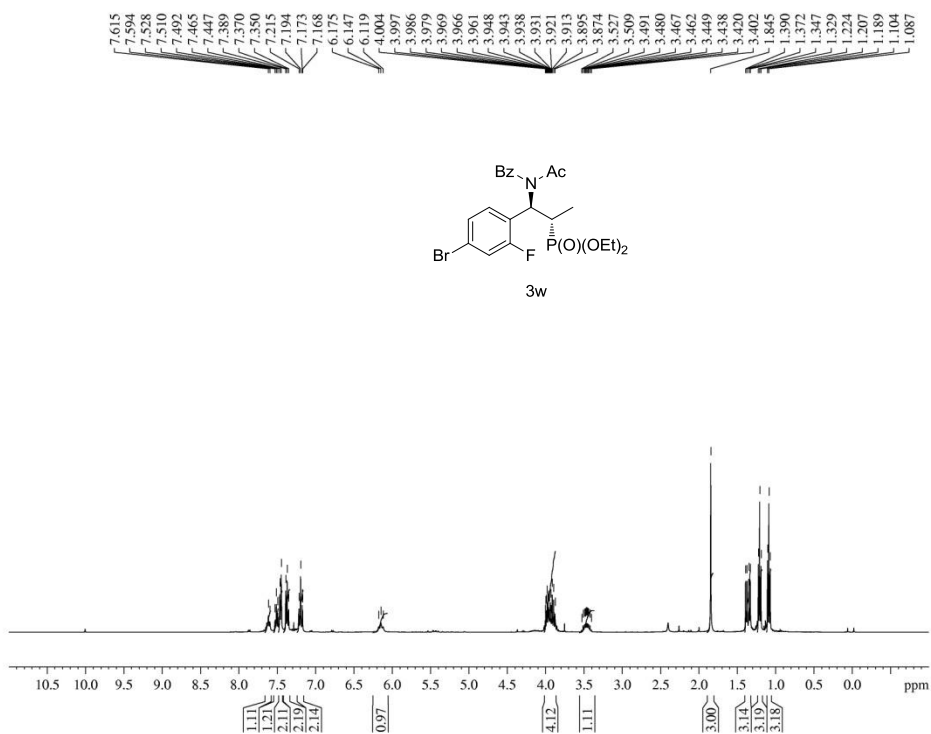

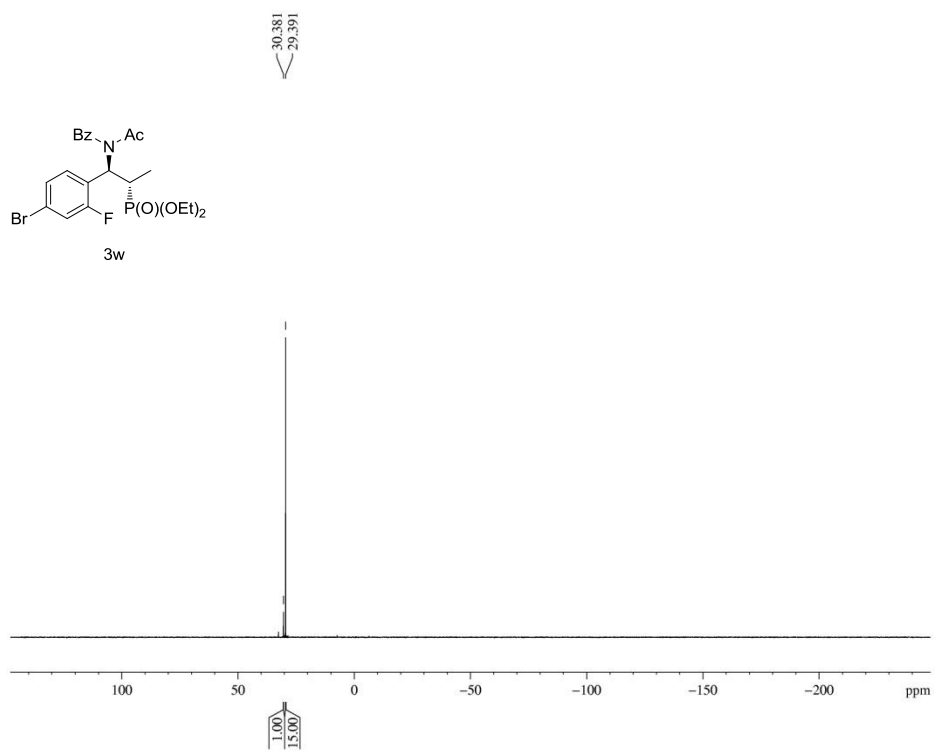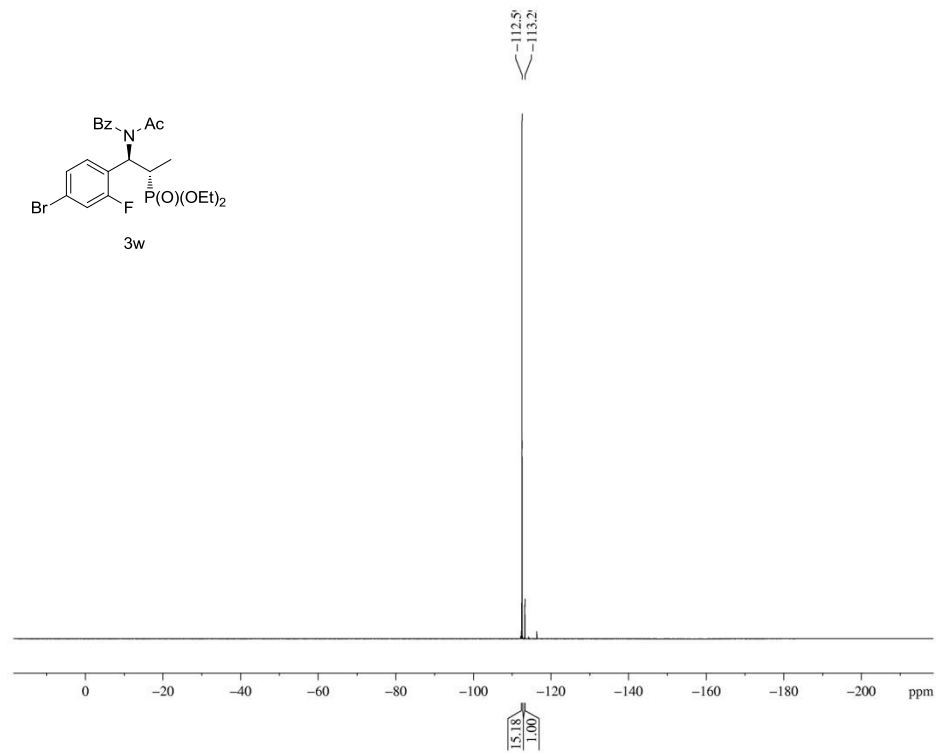



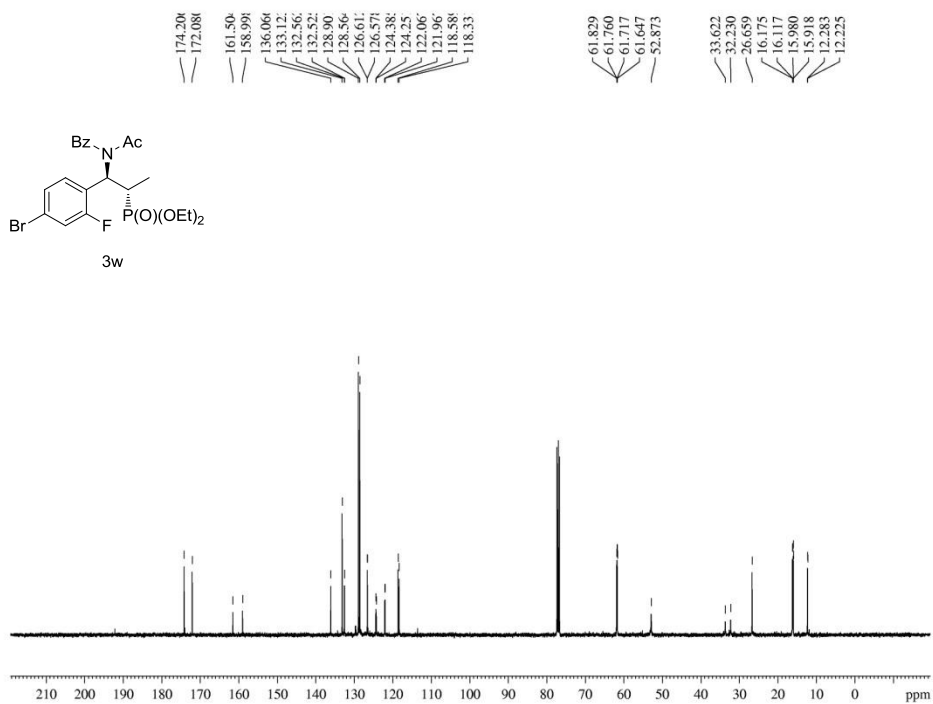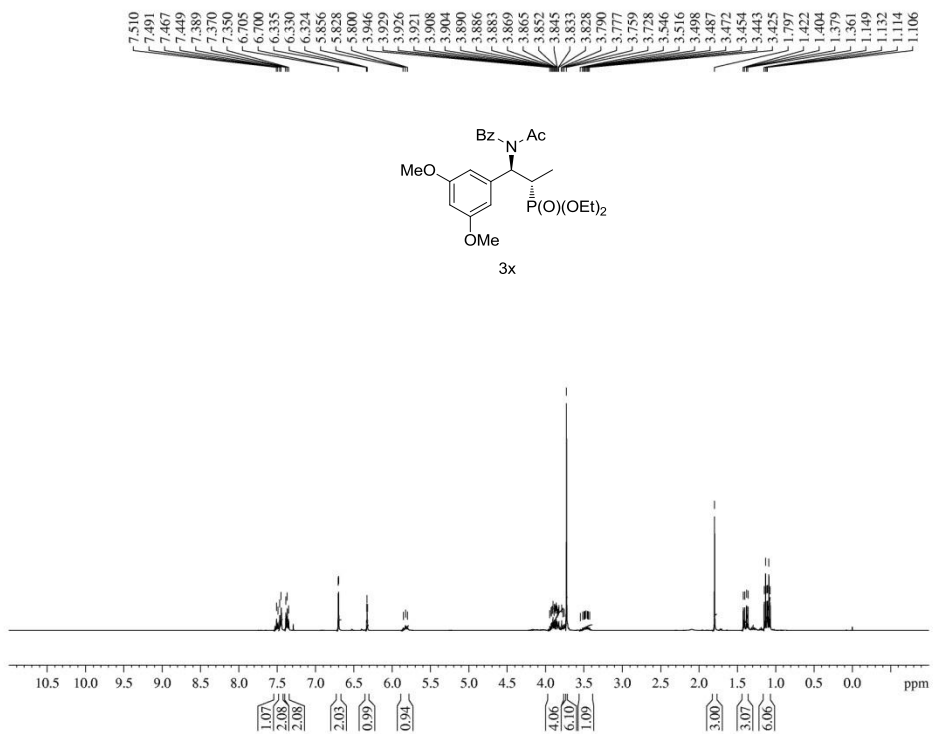

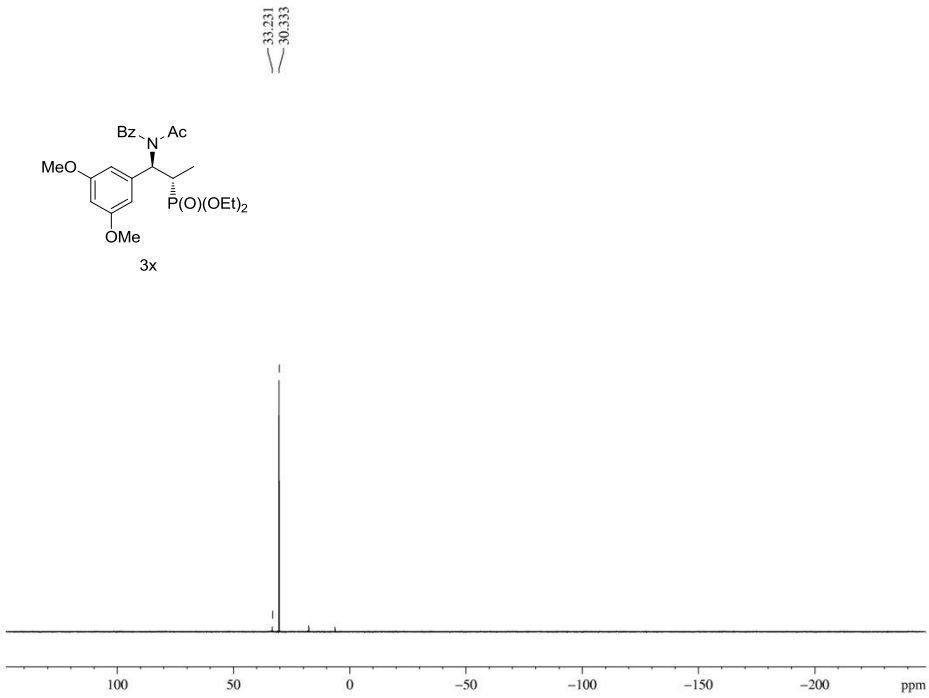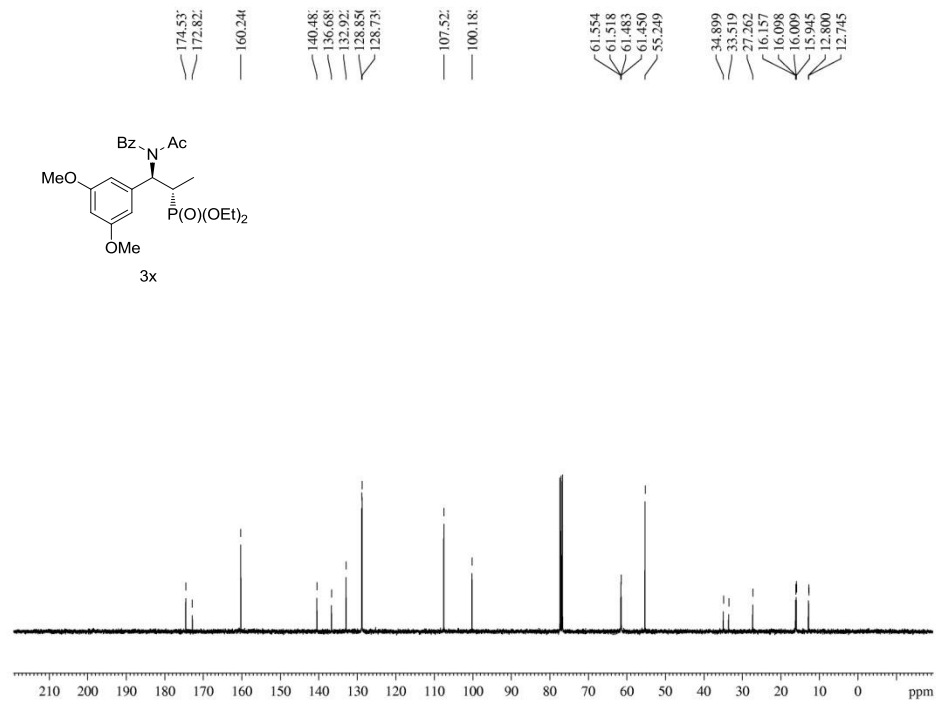

7.568, 7.564, 7.547, 7.522, 7.504, 7.486, 7.424, 7.416, 7.373, 7.355, 7.335, 7.310, 7.307, 7.303, 7.286, 7.282, 7.267, 7.252, 7.248, 7.245, 7.231, 5.969, 5.956, 5.941, 5.913, 3.636, 3.618, 3.606, 3.591, 3.589, 3.574, 3.562, 3.544, 3.488, 3.461, 3.360, 3.334, 1.783, 1.443, 1.425, 1.400, 1.382

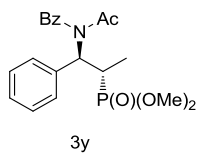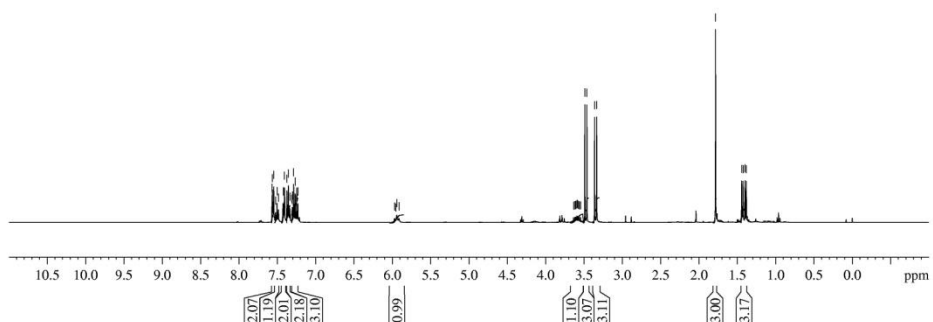

33.932, 33.147

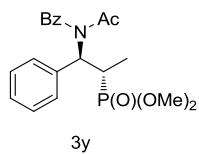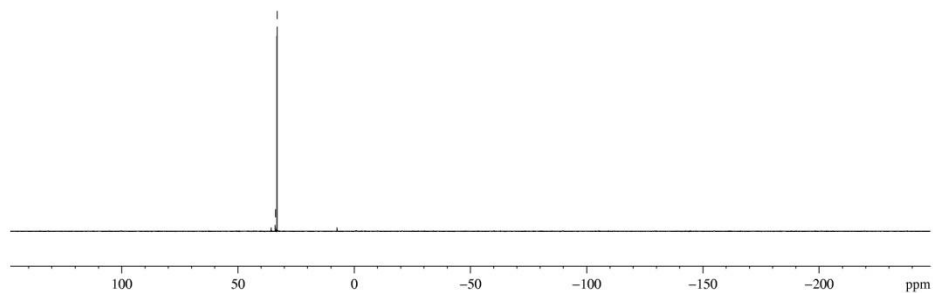

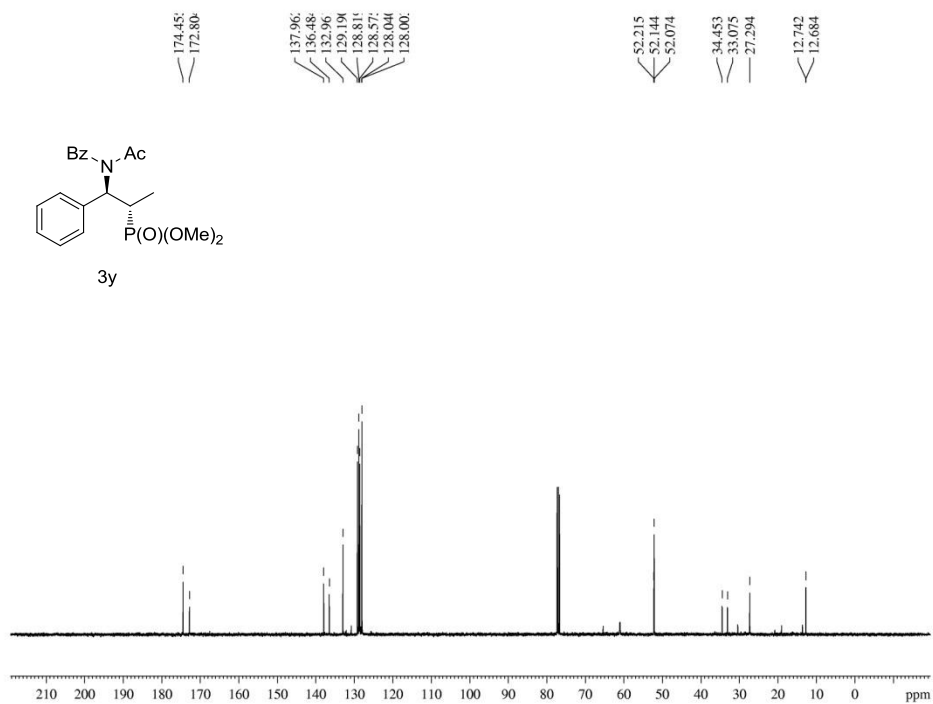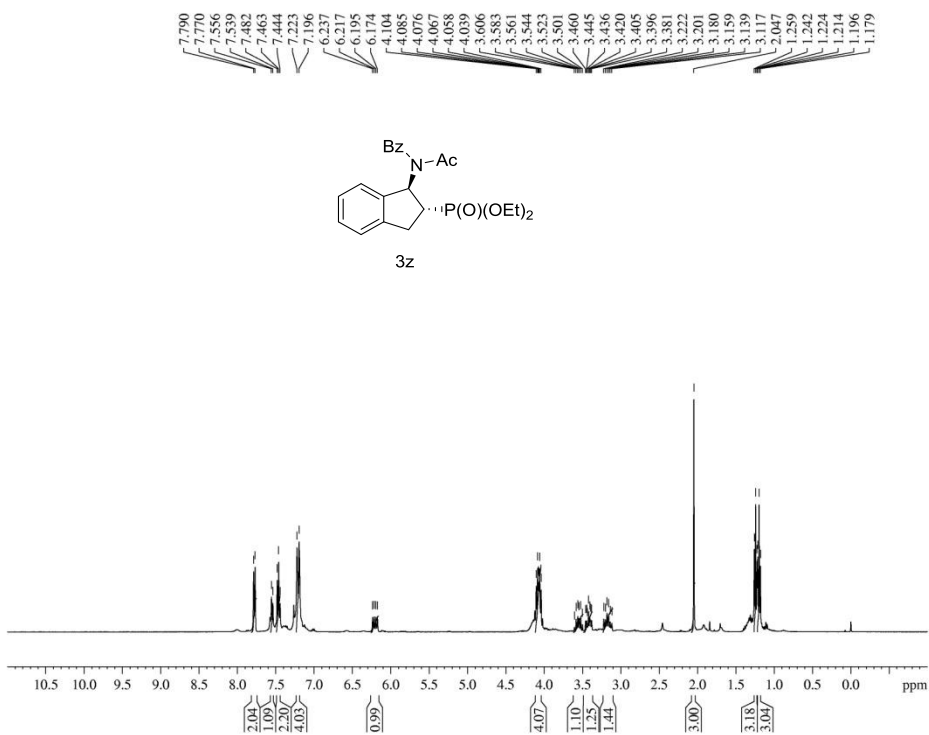

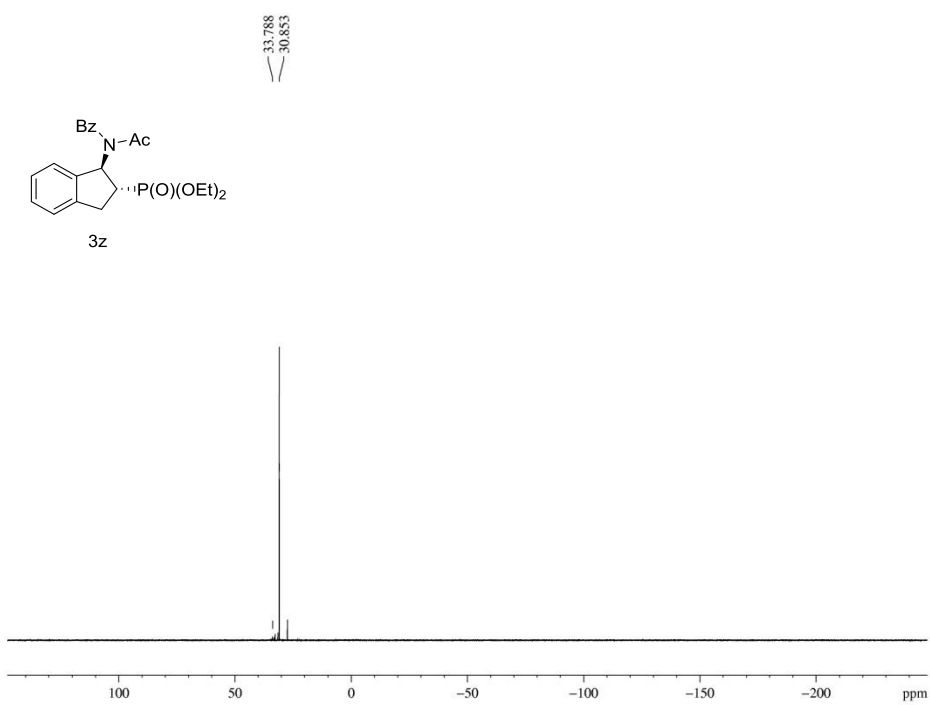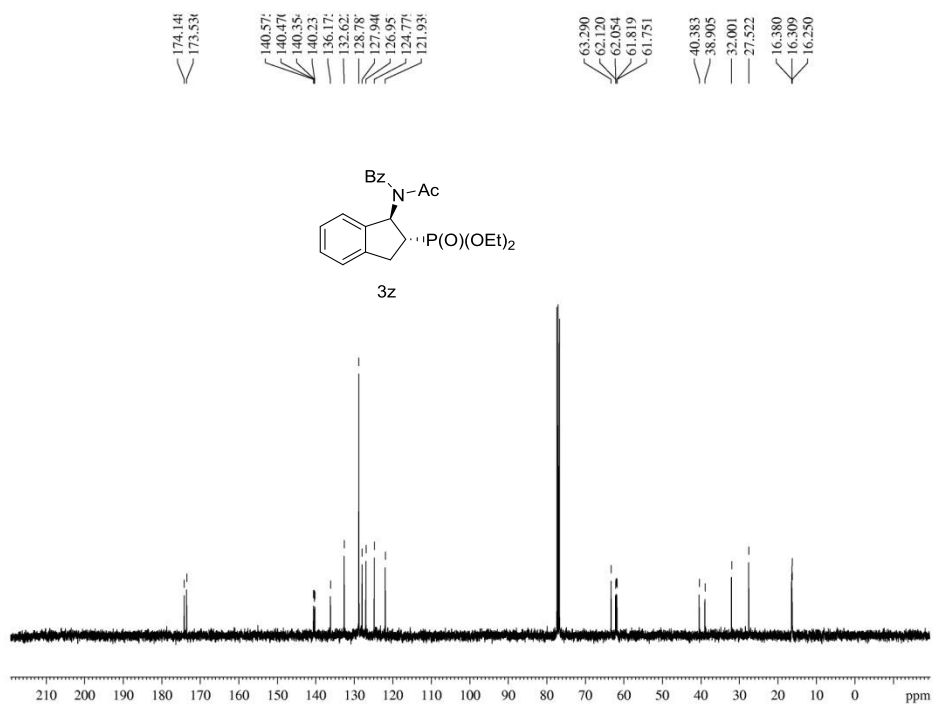

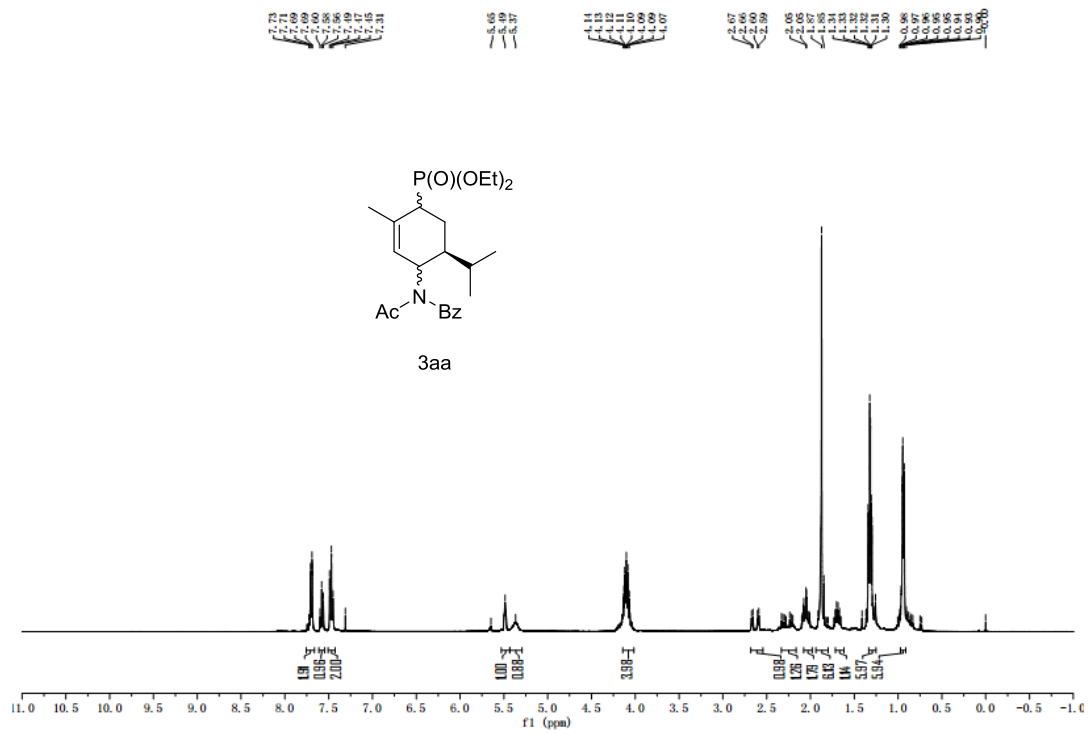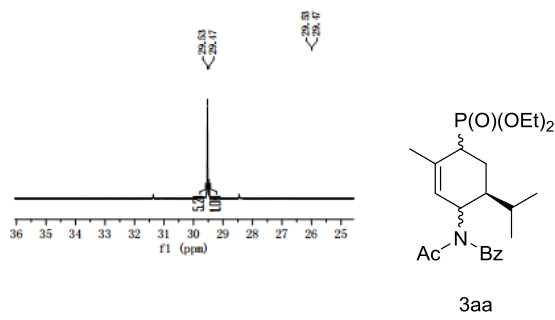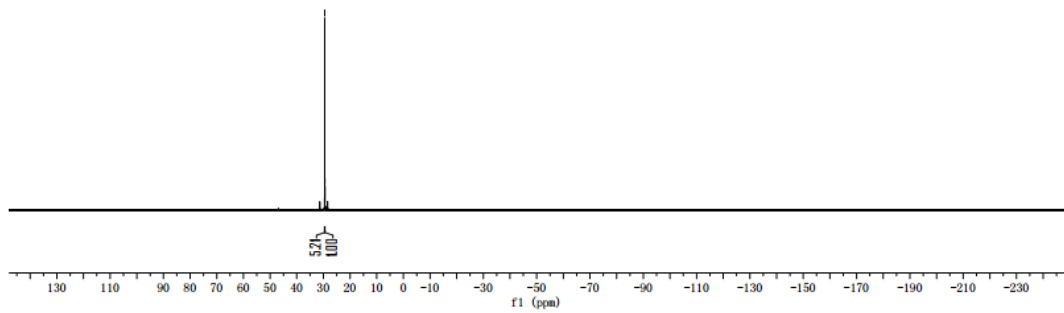

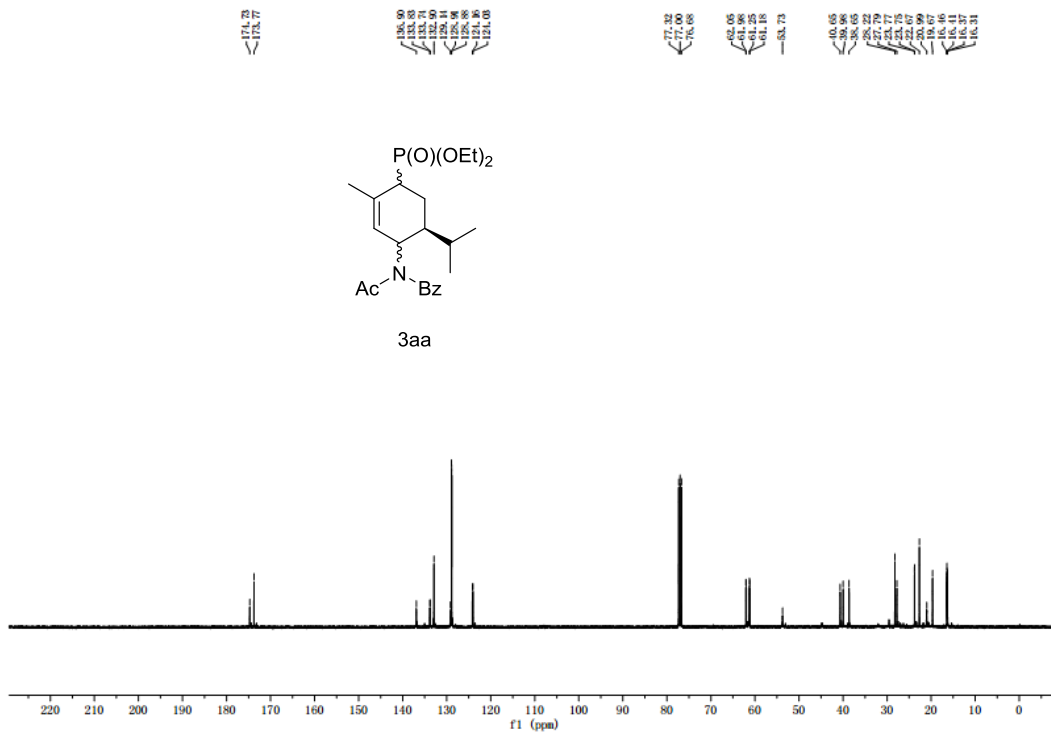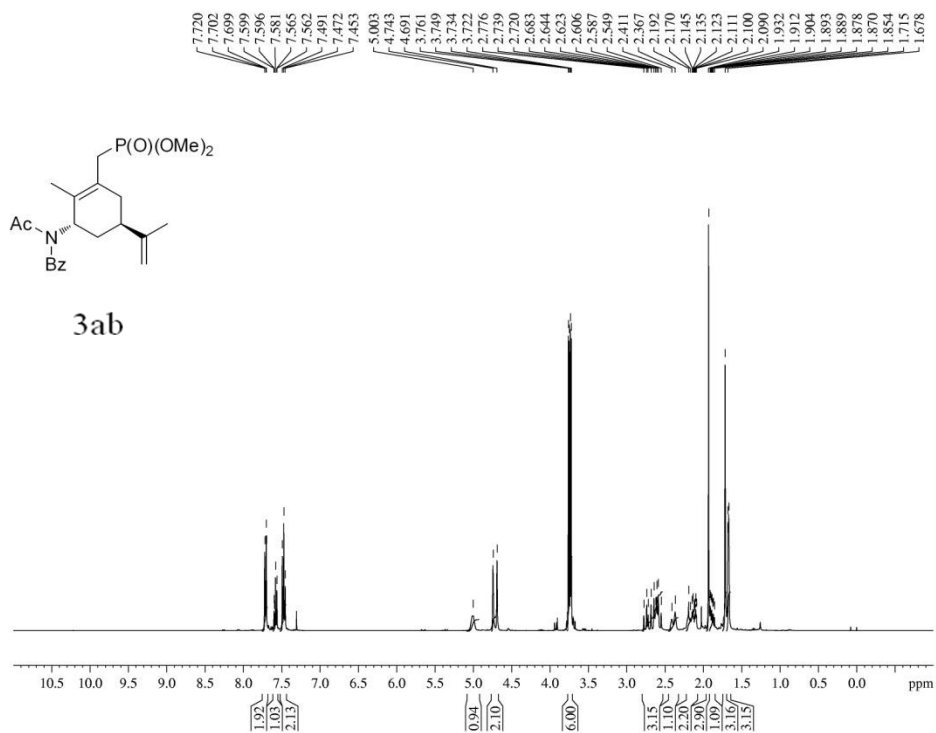

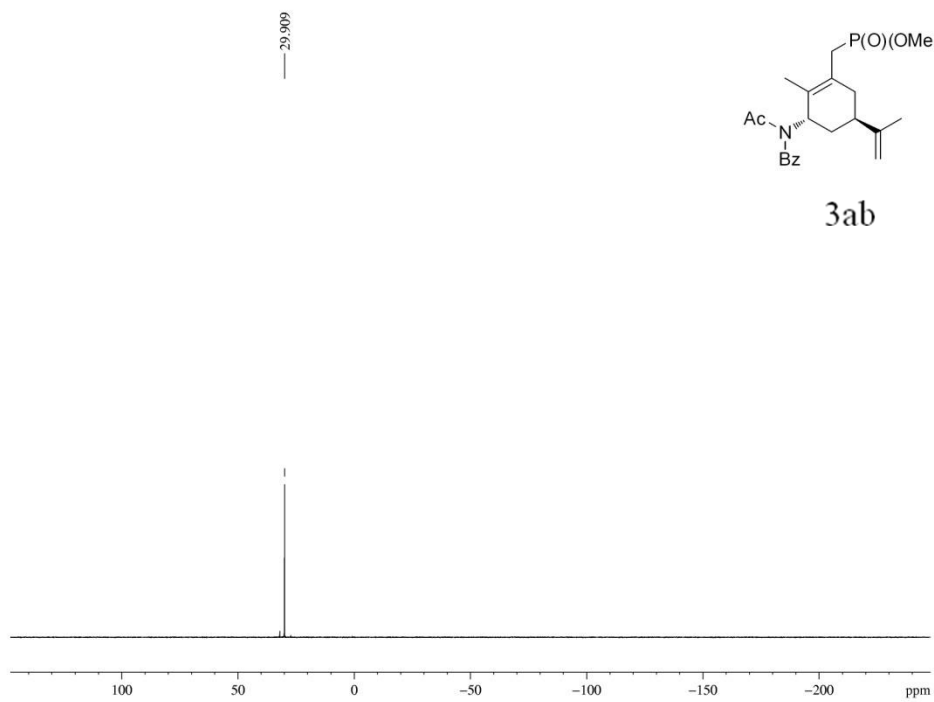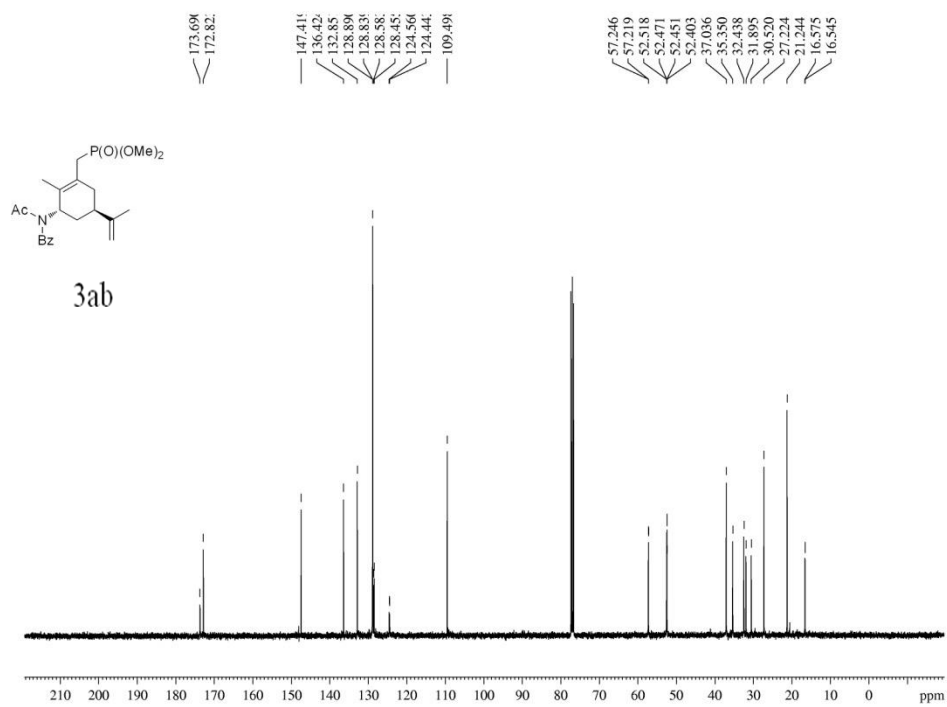



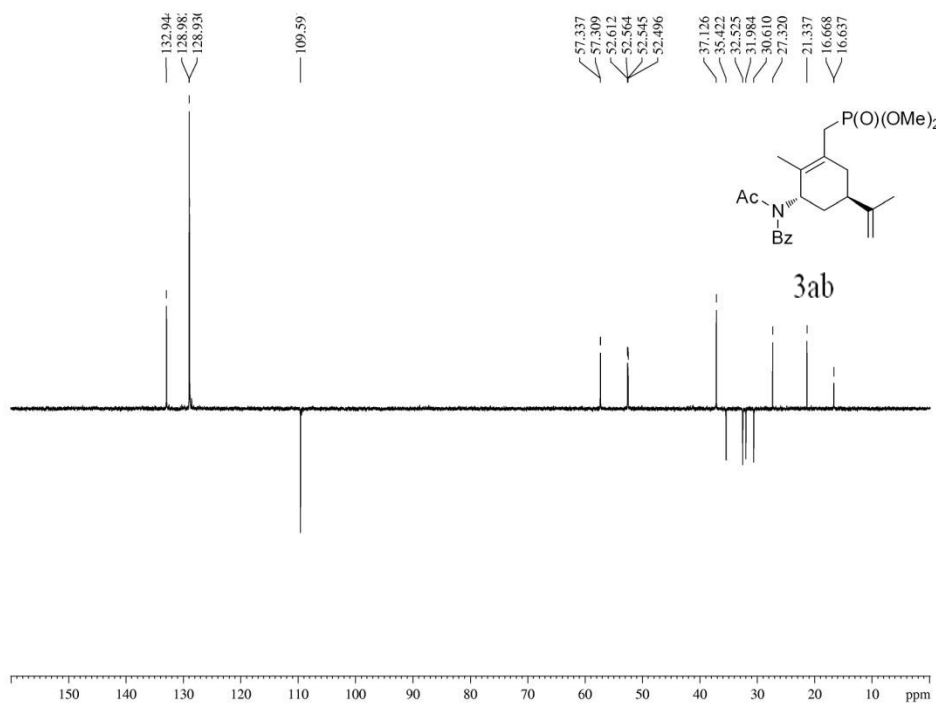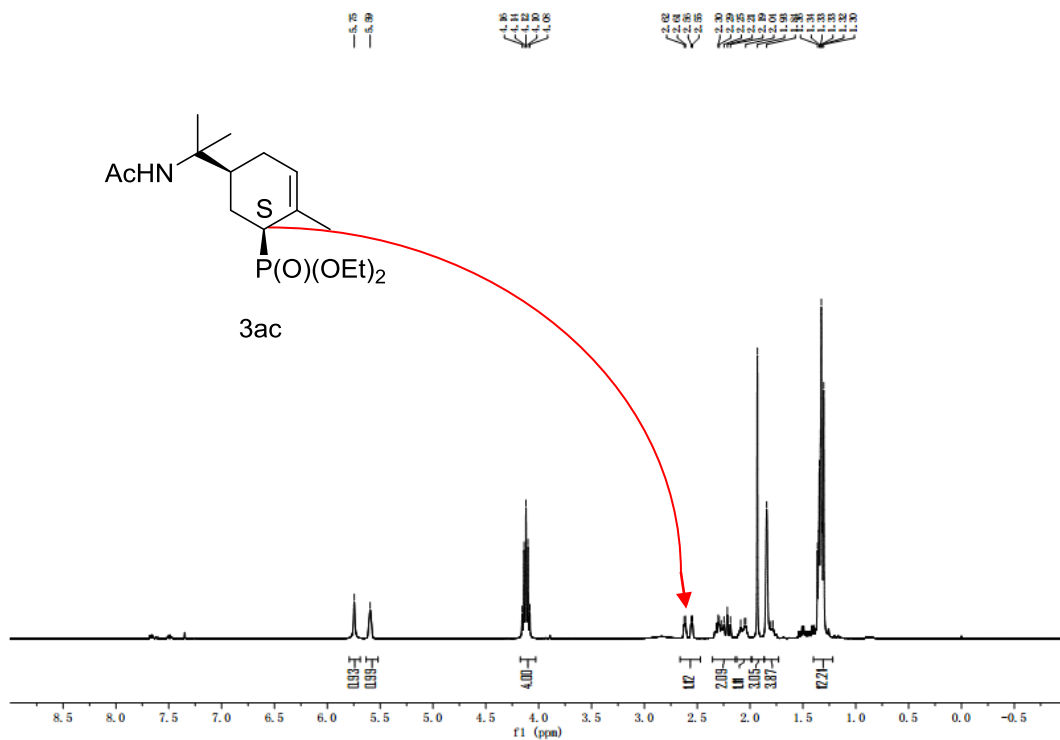

-31.0

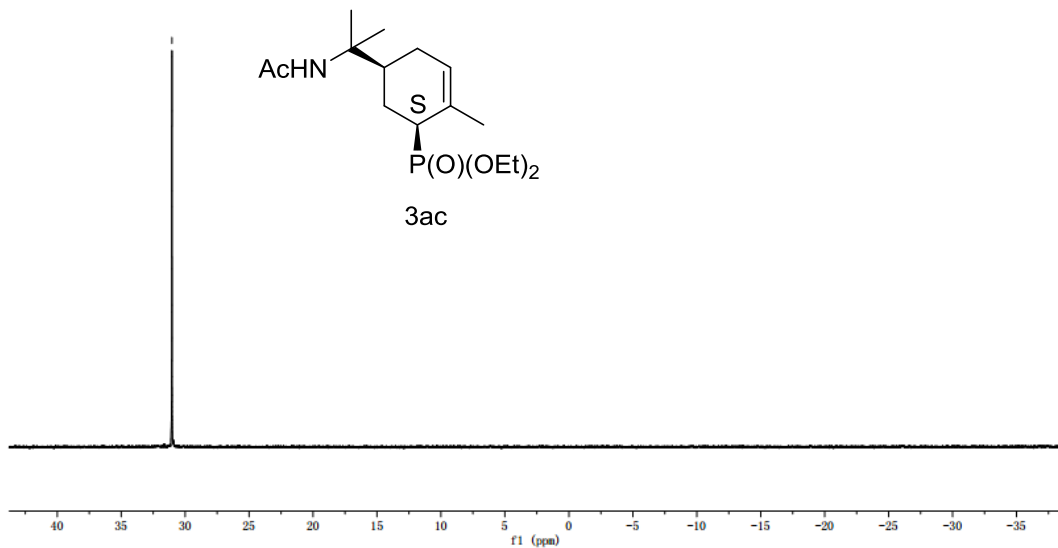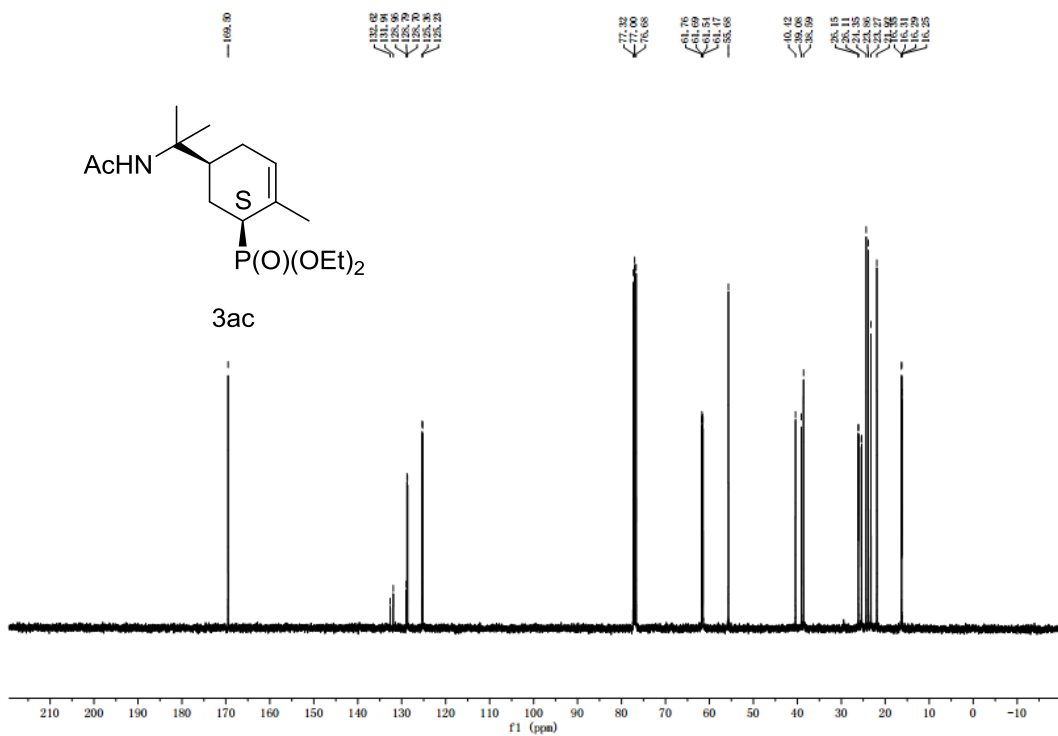

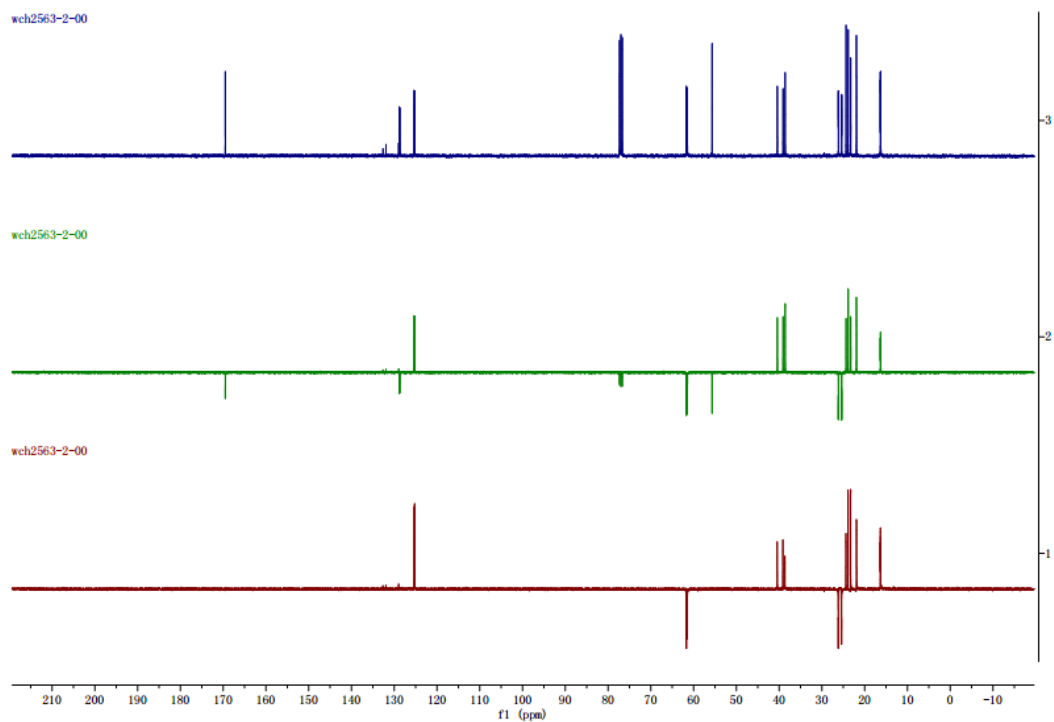

3ac  $^{13}\text{C}$ -APT-DEPT 135

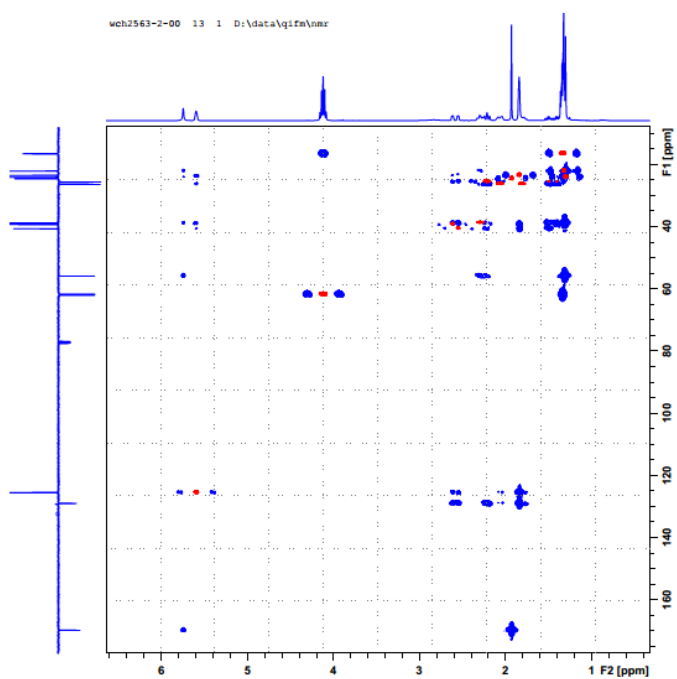

3ac HMBC-HMQC-APT

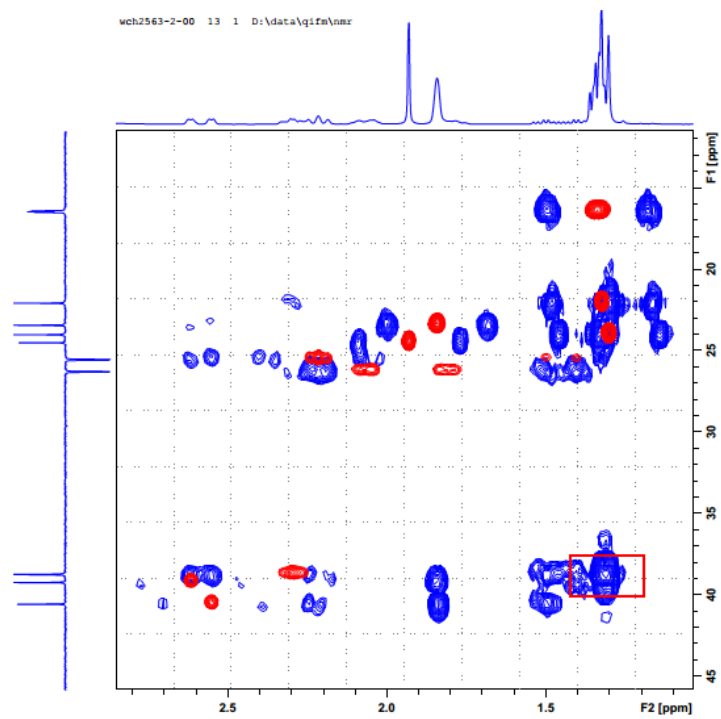

3ac HMBC-HMQC-APT

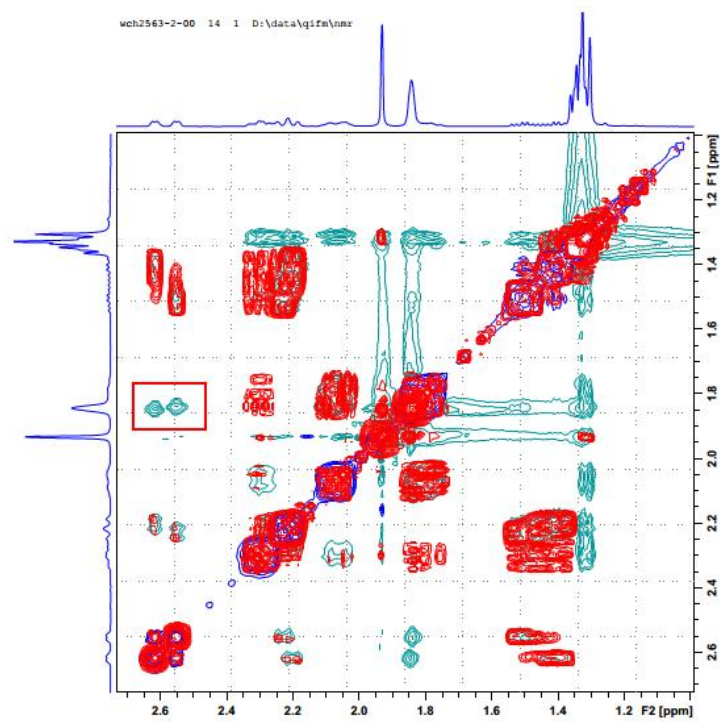

3ac NOESY-COSY

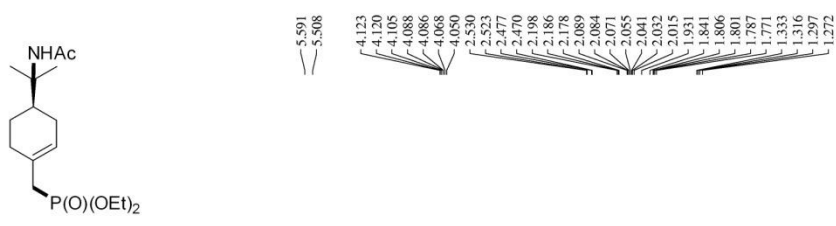

3ad

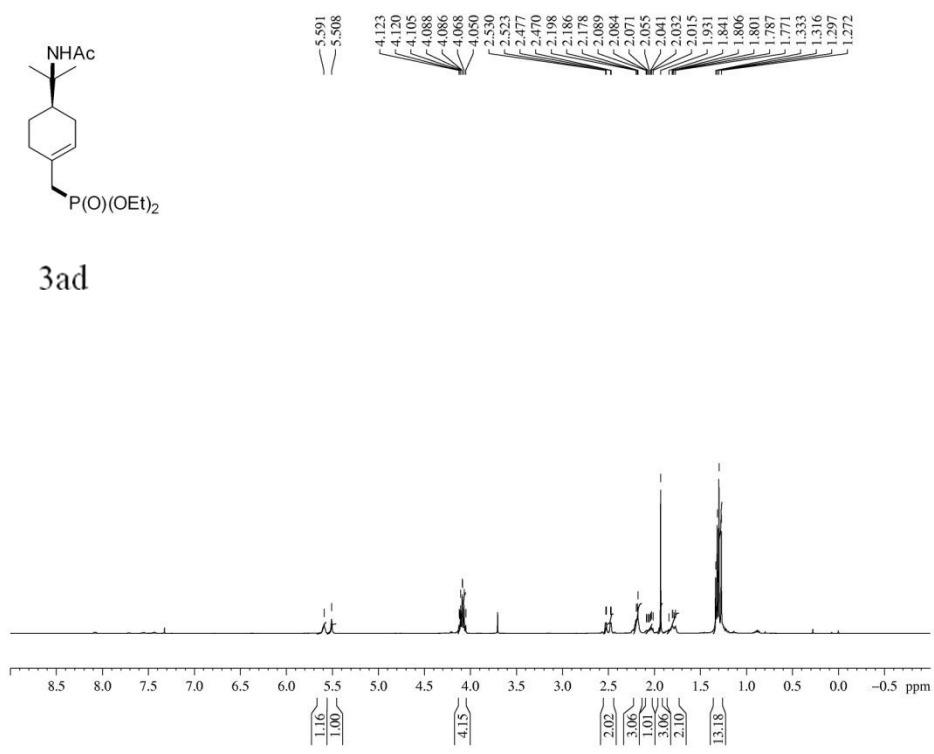

27.905

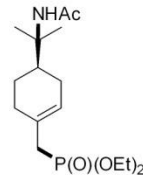

3ad

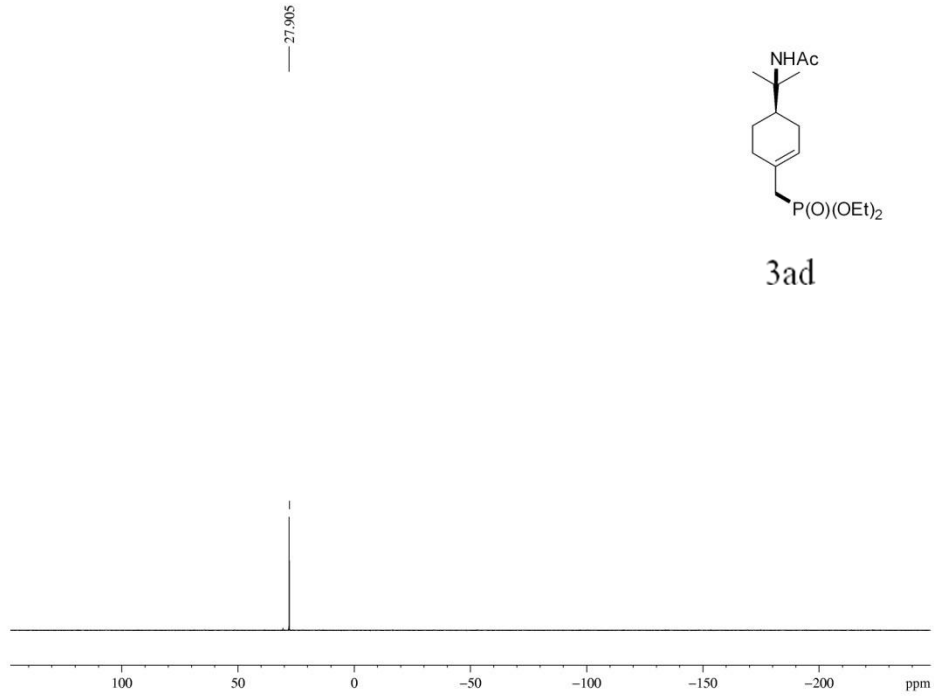

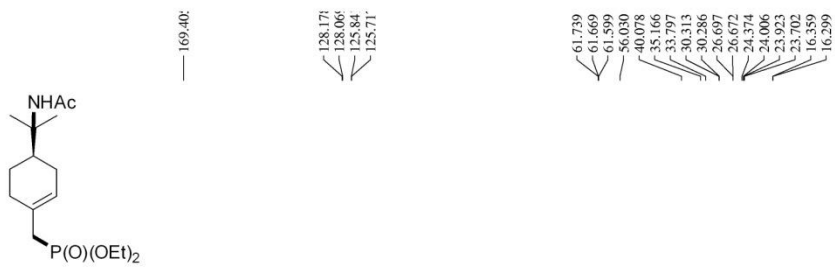

3ad

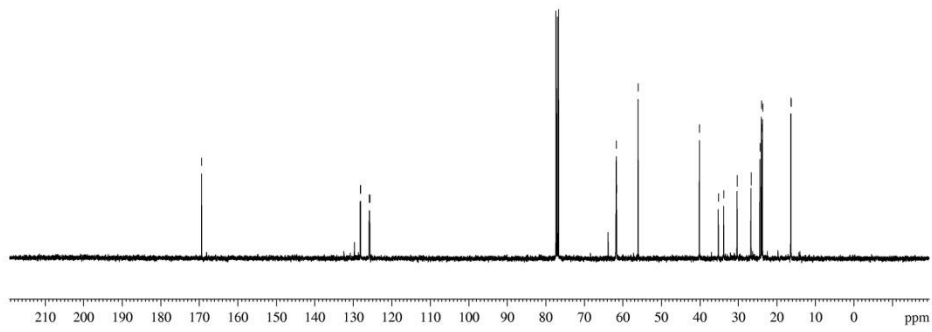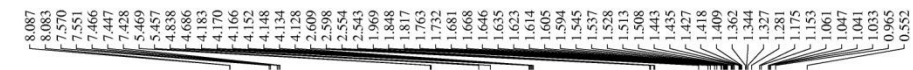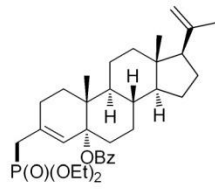

3af

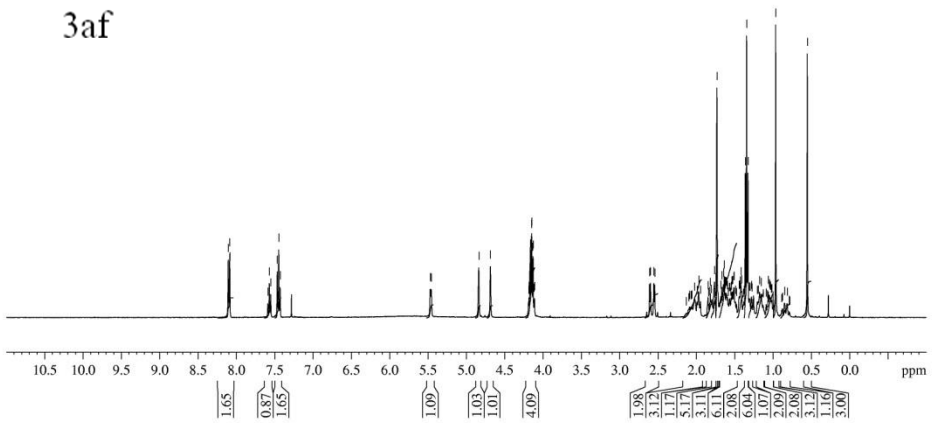

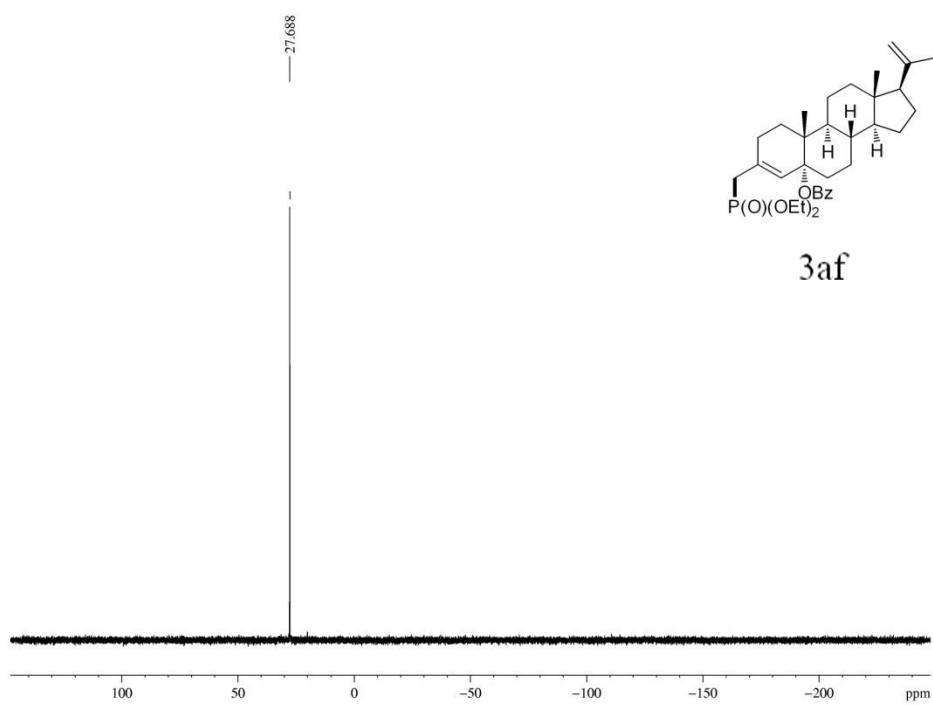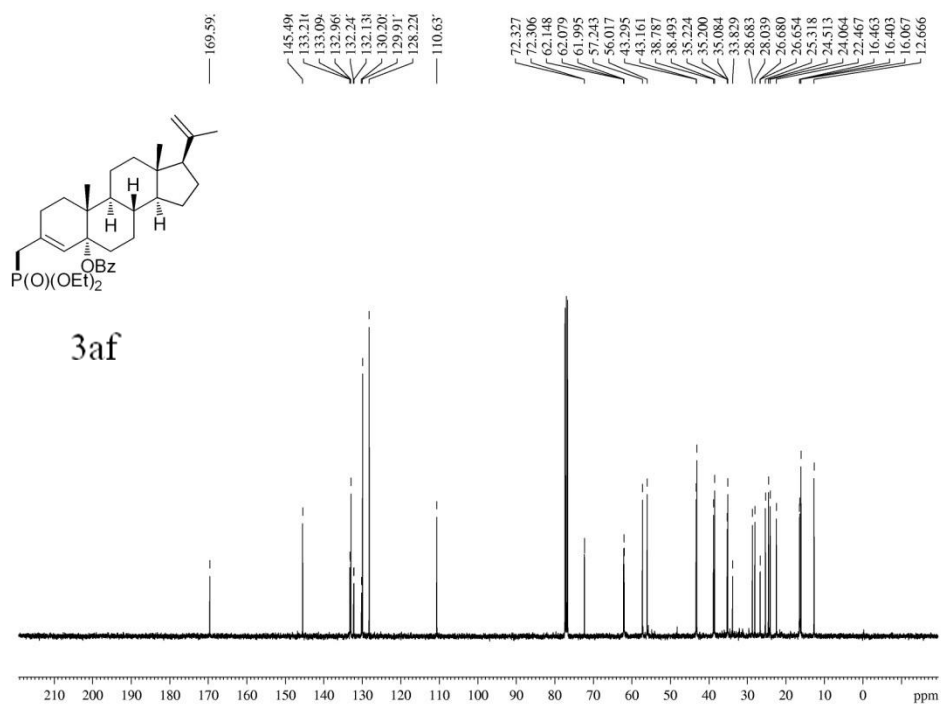

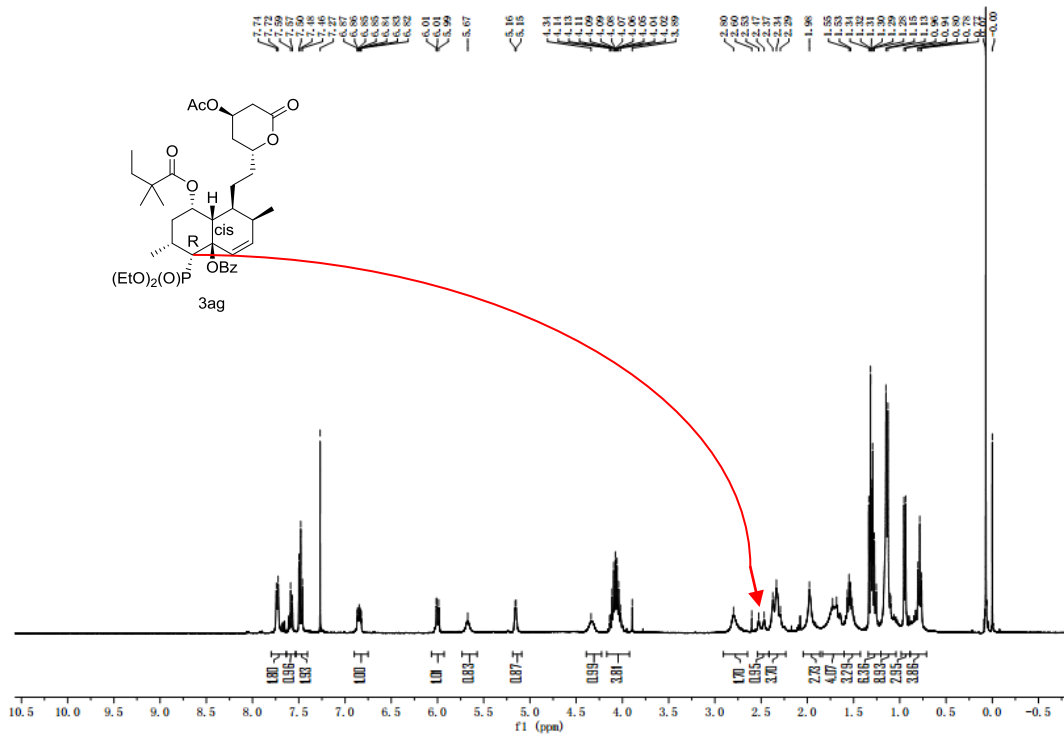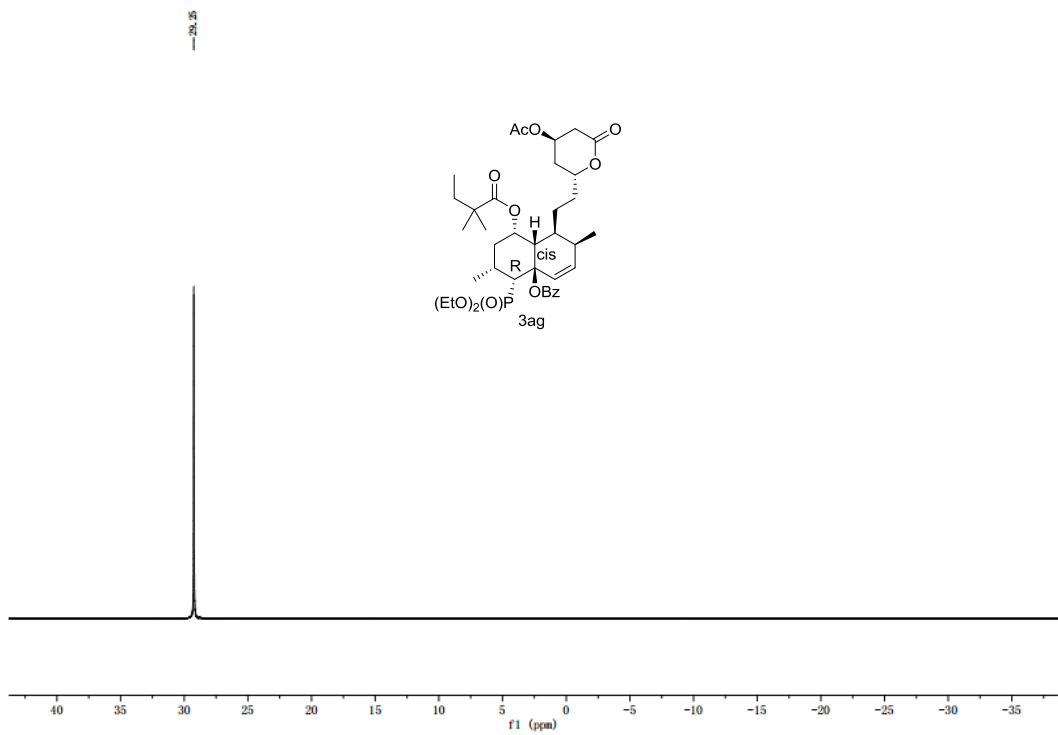



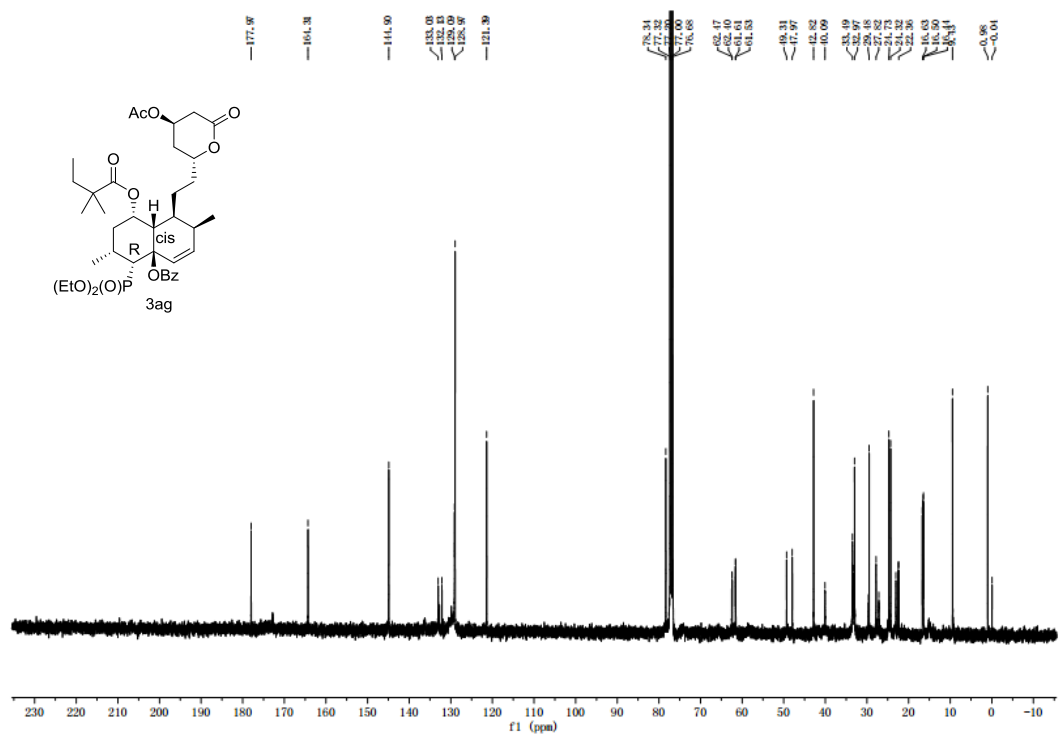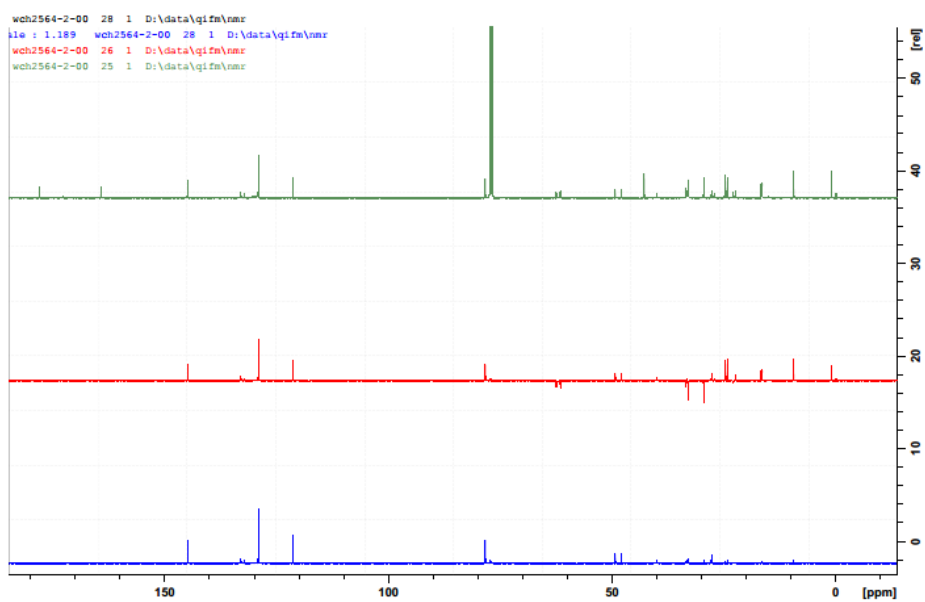

3ag  $^{13}\text{C}$ - DEPT 135- DEPT 90

wch2564-2-00 23 1 D:\data\qifm\nmr

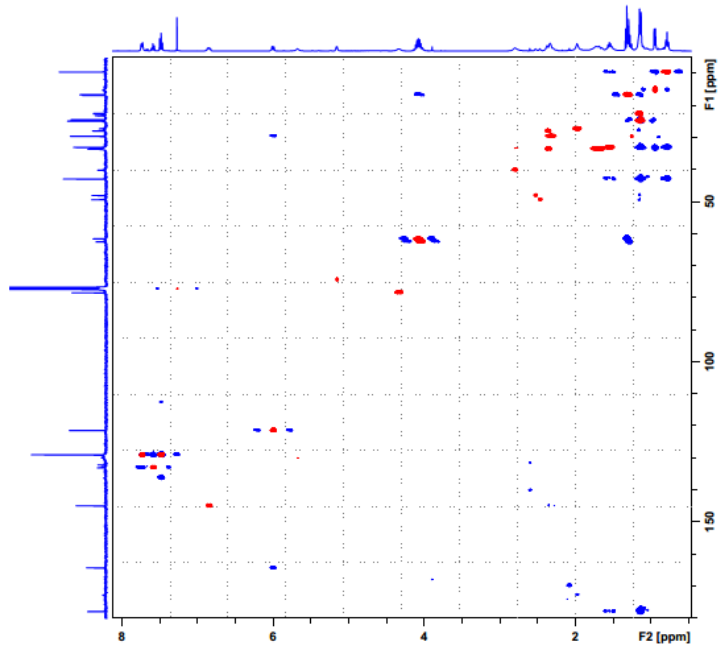

3ag HMBC-HMQC-<sup>13</sup>C

wch2564-2-00 23 1 D:\data\qifm\nmr

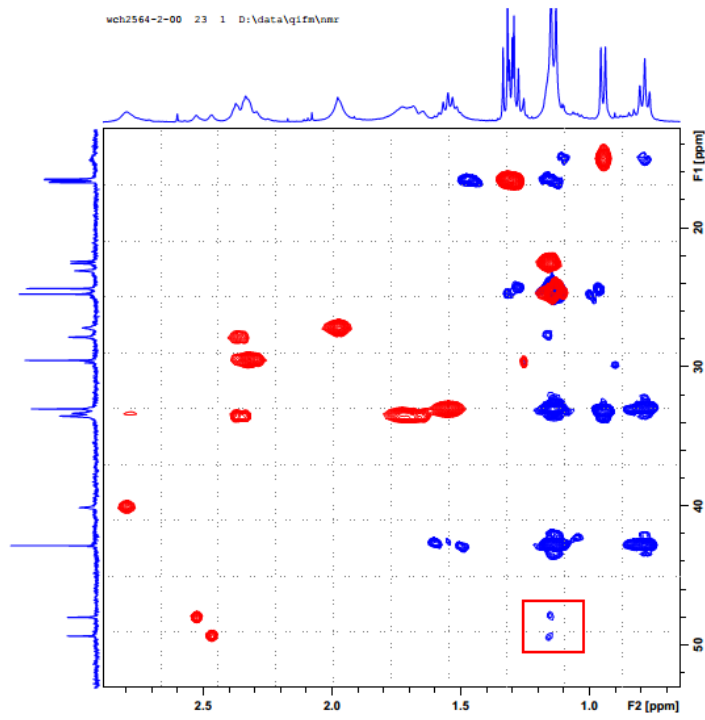

3ag HMBC-HMQC-<sup>13</sup>C

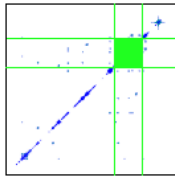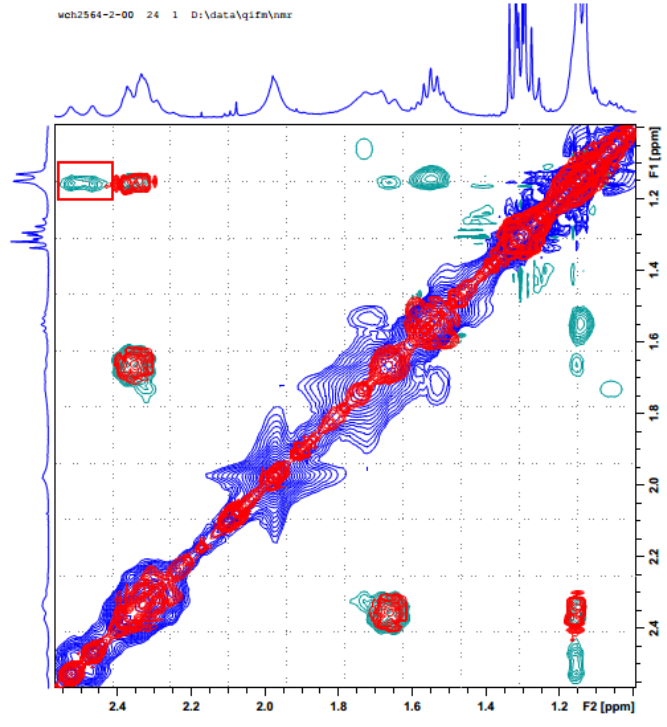

3g NOESY-COSY
